# Supplementary material for: Inefficiencies and Patient Burdens in the Development of the Targeted Cancer Drug Sorafenib: A Systematic Review
Source: PubMed Central journal article supplement (PMC5291369; doi:10.1371/journal.pbio.2000487), 2017-02-03

| Study                       | Events | Total       | Proportion   | 95%-CI                |
|-----------------------------|--------|-------------|--------------|-----------------------|
| <b>industry = 1</b>         |        |             |              |                       |
| Tolcher2011Phase            | 6      | 53          | 0.113        | [0.043; 0.230]        |
| Bianchi2009Phase            | 3      | 54          | 0.056        | [0.012; 0.154]        |
| Awada2005Phase              | 5      | 44          | 0.114        | [0.038; 0.246]        |
| Bengala2010Sorafenib        | 7      | 46          | 0.152        | [0.063; 0.289]        |
| Flaherty2011Interaction     | 4      | 21          | 0.190        | [0.054; 0.419]        |
| Furuse2008Phase             | 17     | 27          | 0.630        | [0.424; 0.806]        |
| Clark2005Safety             | 4      | 19          | 0.211        | [0.061; 0.456]        |
| Hoftijzer2009Beneficial     | 7      | 31          | 0.226        | [0.096; 0.411]        |
| Akaza2007Phase              | 41     | 131         | 0.313        | [0.235; 0.400]        |
| Abou2006Phase               | 14     | 137         | 0.102        | [0.057; 0.166]        |
| Blumenschein2009Phase       | 5      | 52          | 0.096        | [0.032; 0.210]        |
| Elser2007Phase              | 5      | 27          | 0.185        | [0.063; 0.381]        |
| Ratain2006Phase             | 71     | 202         | 0.351        | [0.286; 0.422]        |
| Strumberg2005Phase          | 6      | 69          | 0.087        | [0.033; 0.180]        |
| Cheng2009Efficacy           | 16     | 149         | 0.107        | [0.063; 0.169]        |
| Escudier2007Sorafenib       | 27     | 451         | 0.060        | [0.040; 0.086]        |
| Llovet2008Sorafenib         | 24     | 297         | 0.081        | [0.052; 0.118]        |
| Dingemans2013Phase          | 4      | 57          | 0.070        | [0.019; 0.170]        |
| Pressiani2013Sorafenib      | 44     | 297         | 0.148        | [0.110; 0.194]        |
| Santoro2013Phase            | 7      | 100         | 0.070        | [0.029; 0.139]        |
| Brose2014Sorafenib          | 43     | 207         | 0.208        | [0.155; 0.269]        |
| <b>Random effects model</b> |        | <b>2471</b> | <b>0.147</b> | <b>[0.106; 0.199]</b> |

Heterogeneity: I-squared=88.6%, tau-squared=0.6065, p<0.0001

|                             |    |             |              |                       |
|-----------------------------|----|-------------|--------------|-----------------------|
| <b>industry = 0</b>         |    |             |              |                       |
| Kelly2011Evaluation         | 6  | 37          | 0.162        | [0.062; 0.320]        |
| Jonasch2010Upfront          | 10 | 40          | 0.250        | [0.127; 0.412]        |
| Chi2007Phase                | 2  | 28          | 0.071        | [0.009; 0.235]        |
| Moore2005Phase              | 4  | 41          | 0.098        | [0.027; 0.231]        |
| Eisen2006Sorafenib          | 5  | 37          | 0.135        | [0.045; 0.288]        |
| Steinbild2007Clinical       | 3  | 55          | 0.055        | [0.011; 0.151]        |
| Dreicer2009Phase            | 5  | 27          | 0.185        | [0.063; 0.381]        |
| Dy2010Front                 | 5  | 25          | 0.200        | [0.068; 0.407]        |
| Von2012Phase                | 6  | 37          | 0.162        | [0.062; 0.320]        |
| Yau2009Phase                | 10 | 51          | 0.196        | [0.098; 0.331]        |
| Minami2008Phase             | 7  | 31          | 0.226        | [0.096; 0.411]        |
| Dahut2008Phase              | 2  | 22          | 0.091        | [0.011; 0.292]        |
| Ahmed2011Analysis           | 15 | 34          | 0.441        | [0.272; 0.621]        |
| Bodnar2011Sorafenib         | 1  | 11          | 0.091        | [0.002; 0.413]        |
| Nimeiri2010Phase            | 7  | 56          | 0.125        | [0.052; 0.241]        |
| Borthakur2011Phase          | 19 | 50          | 0.380        | [0.247; 0.528]        |
| EI2012Randomized            | 1  | 15          | 0.067        | [0.002; 0.319]        |
| Sridhar2011Phase            | 4  | 17          | 0.235        | [0.068; 0.499]        |
| Worns2009Safety             | 8  | 34          | 0.235        | [0.107; 0.412]        |
| Escudier2009Randomized      | 11 | 97          | 0.113        | [0.058; 0.194]        |
| Gupta2008Phase              | 5  | 30          | 0.167        | [0.056; 0.347]        |
| Kloos2009Phase              | 10 | 56          | 0.179        | [0.089; 0.304]        |
| Lam2010Phase                | 4  | 21          | 0.190        | [0.054; 0.419]        |
| Maki2009Phase               | 20 | 145         | 0.138        | [0.086; 0.205]        |
| Matei2011Activity           | 14 | 71          | 0.197        | [0.112; 0.309]        |
| Miller2009Phase             | 4  | 138         | 0.029        | [0.008; 0.073]        |
| Moreno2009Phase             | 1  | 23          | 0.043        | [0.001; 0.219]        |
| Williamson2010Phase         | 3  | 41          | 0.073        | [0.015; 0.199]        |
| Dubey2010Phase              | 13 | 50          | 0.260        | [0.146; 0.403]        |
| Gitlitz2010Sorafenib        | 23 | 83          | 0.277        | [0.184; 0.386]        |
| Crump2010Randomized         | 4  | 42          | 0.095        | [0.027; 0.226]        |
| Nabors2011Phase             | 5  | 47          | 0.106        | [0.035; 0.231]        |
| Ott2010Phase                | 2  | 35          | 0.057        | [0.007; 0.192]        |
| Chen2011Response            | 0  | 9           | 0.000        | [0.000; 0.336]        |
| Safarinejad2010Safety       | 4  | 64          | 0.062        | [0.017; 0.152]        |
| Pratz2010Pharmacodynamic    | 3  | 15          | 0.200        | [0.043; 0.481]        |
| Amato2012Phase2             | 30 | 44          | 0.682        | [0.524; 0.814]        |
| EI2012Swog                  | 5  | 31          | 0.161        | [0.055; 0.337]        |
| Grignani2011Phase           | 3  | 35          | 0.086        | [0.018; 0.231]        |
| Guidetti2012Phase           | 6  | 30          | 0.200        | [0.077; 0.386]        |
| Man2012Sorafenib            | 0  | 13          | 0.000        | [0.000; 0.247]        |
| Park2012Sorafenib           | 5  | 31          | 0.161        | [0.055; 0.337]        |
| Ray2012Sorafenib            | 6  | 39          | 0.154        | [0.059; 0.305]        |
| Semrad2012Feasibility       | 12 | 50          | 0.240        | [0.131; 0.382]        |
| Wakelee2012Double           | 54 | 333         | 0.162        | [0.124; 0.206]        |
| Widemann2012Phase           | 4  | 64          | 0.062        | [0.017; 0.152]        |
| Kim2011Battle               | 17 | 105         | 0.162        | [0.097; 0.247]        |
| Chevreau2013Sorafenib       | 3  | 15          | 0.200        | [0.043; 0.481]        |
| Greenwald2013Phase          | 5  | 14          | 0.357        | [0.128; 0.649]        |
| Papa2013Phase               | 8  | 53          | 0.151        | [0.067; 0.276]        |
| Savvides2013Phase           | 3  | 20          | 0.150        | [0.032; 0.379]        |
| Yordanova2013Sorafenib      | 1  | 11          | 0.091        | [0.002; 0.413]        |
| Schwandt2014Randomized      | 3  | 14          | 0.214        | [0.047; 0.508]        |
| <b>Random effects model</b> |    | <b>2517</b> | <b>0.164</b> | <b>[0.138; 0.194]</b> |

Heterogeneity: I-squared=66.1%, tau-squared=0.3342, p<0.0001

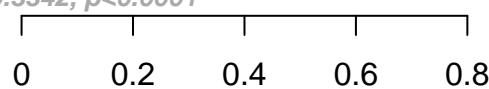

Supplement: pbio.2000487.s003.pdf [file pbio.2000487.s003.pdf]
