# Supplementary material for: Inefficiencies and Patient Burdens in the Development of the Targeted Cancer Drug Sorafenib: A Systematic Review
Source: PubMed Central journal article supplement (PMC5291369; doi:10.1371/journal.pbio.2000487), 2017-02-03

| Study                       | Events | Total      | Proportion   | 95%-CI                |
|-----------------------------|--------|------------|--------------|-----------------------|
| <b>phase_meta = p1</b>      |        |            |              |                       |
| Tolcher2011Phase            | 1      | 48         | 0.021        | [0.001; 0.111]        |
| Moore2005Phase              | 0      | 41         | 0.000        | [0.000; 0.086]        |
| Awada2005Phase              | 1      | 32         | 0.031        | [0.001; 0.162]        |
| Furuse2008Phase             | 1      | 27         | 0.037        | [0.001; 0.190]        |
| Minami2008Phase             | 2      | 29         | 0.069        | [0.008; 0.228]        |
| Clark2005Safety             | 0      | 19         | 0.000        | [0.000; 0.176]        |
| Miller2009Phase             | 4      | 138        | 0.029        | [0.008; 0.073]        |
| Strumberg2005Phase          | 1      | 66         | 0.015        | [0.000; 0.082]        |
| <b>Random effects model</b> |        | <b>400</b> | <b>0.030</b> | <b>[0.017; 0.054]</b> |

Heterogeneity: I-squared=0%, tau-squared=0, p=0.9237

| Study                       | Events | Total       | Proportion   | 95%-CI                |
|-----------------------------|--------|-------------|--------------|-----------------------|
| <b>phase_meta = p2</b>      |        |             |              |                       |
| Kelly2011Evaluation         | 2      | 34          | 0.059        | [0.007; 0.197]        |
| Jonasch2010Upfront          | 12     | 40          | 0.300        | [0.166; 0.465]        |
| Chi2007Phase                | 0      | 8           | 0.000        | [0.000; 0.369]        |
| Bianchi2009Phase            | 1      | 54          | 0.019        | [0.000; 0.099]        |
| Bengala2010Sorafenib        | 1      | 46          | 0.022        | [0.001; 0.115]        |
| Eisen2006Sorafenib          | 0      | 37          | 0.000        | [0.000; 0.095]        |
| Steinbild2007Clinical       | 0      | 55          | 0.000        | [0.000; 0.065]        |
| Dreicer2009Phase            | 0      | 22          | 0.000        | [0.000; 0.154]        |
| Dy2010Front                 | 3      | 25          | 0.120        | [0.025; 0.312]        |
| Von2012Phase                | 0      | 37          | 0.000        | [0.000; 0.095]        |
| Yau2009Phase                | 4      | 51          | 0.078        | [0.022; 0.189]        |
| Dahut2008Phase              | 0      | 22          | 0.000        | [0.000; 0.154]        |
| Ahmed2011Analysis           | 7      | 34          | 0.206        | [0.087; 0.379]        |
| Hoftijzer2009Beneficial     | 8      | 32          | 0.250        | [0.115; 0.434]        |
| Bodnar2011Sorafenib         | 0      | 11          | 0.000        | [0.000; 0.285]        |
| Nimeiri2010Phase            | 2      | 56          | 0.036        | [0.004; 0.123]        |
| El2012Randomized            | 0      | 13          | 0.000        | [0.000; 0.247]        |
| Sridhar2011Phase            | 0      | 14          | 0.000        | [0.000; 0.232]        |
| Akaza2007Phase              | 16     | 129         | 0.124        | [0.073; 0.194]        |
| Worns2009Safety             | 1      | 34          | 0.029        | [0.001; 0.153]        |
| Abou2006Phase               | 3      | 137         | 0.022        | [0.005; 0.063]        |
| Blumenschein2009Phase       | 0      | 51          | 0.000        | [0.000; 0.070]        |
| Elser2007Phase              | 1      | 27          | 0.037        | [0.001; 0.190]        |
| Escudier2009Randomized      | 14     | 97          | 0.144        | [0.081; 0.230]        |
| Gupta2008Phase              | 7      | 30          | 0.233        | [0.099; 0.423]        |
| Kloos2009Phase              | 6      | 56          | 0.107        | [0.040; 0.219]        |
| Lam2010Phase                | 2      | 21          | 0.095        | [0.012; 0.304]        |
| Maki2009Phase               | 6      | 122         | 0.049        | [0.018; 0.104]        |
| Matei2011Activity           | 2      | 59          | 0.034        | [0.004; 0.117]        |
| Moreno2009Phase             | 0      | 20          | 0.000        | [0.000; 0.168]        |
| Ratain2006Phase             | 8      | 202         | 0.040        | [0.017; 0.077]        |
| Williamson2010Phase         | 1      | 41          | 0.024        | [0.001; 0.129]        |
| Dubey2010Phase              | 3      | 50          | 0.060        | [0.013; 0.165]        |
| Gitlitz2010Sorafenib        | 1      | 83          | 0.012        | [0.000; 0.065]        |
| Ott2010Phase                | 1      | 36          | 0.028        | [0.001; 0.145]        |
| Chen2011Response            | 3      | 9           | 0.333        | [0.075; 0.701]        |
| Safarinejad2010Safety       | 5      | 64          | 0.078        | [0.026; 0.173]        |
| Amato2012Phase2             | 21     | 44          | 0.477        | [0.325; 0.633]        |
| El2012Swog                  | 0      | 25          | 0.000        | [0.000; 0.137]        |
| Grignani2011Phase           | 3      | 35          | 0.086        | [0.018; 0.231]        |
| Park2012Sorafenib           | 4      | 31          | 0.129        | [0.036; 0.298]        |
| Ray2012Sorafenib            | 5      | 36          | 0.139        | [0.047; 0.295]        |
| Semrad2012Feasibility       | 0      | 34          | 0.000        | [0.000; 0.103]        |
| Wakelee2012Double           | 11     | 299         | 0.037        | [0.019; 0.065]        |
| Kim2011Battle               | 2      | 98          | 0.020        | [0.002; 0.072]        |
| Chevreau2013Sorafenib       | 2      | 13          | 0.154        | [0.019; 0.454]        |
| Dingemans2013Phase          | 5      | 57          | 0.088        | [0.029; 0.193]        |
| Papa2013Phase               | 3      | 53          | 0.057        | [0.012; 0.157]        |
| Santoro2013Phase            | 11     | 76          | 0.145        | [0.075; 0.244]        |
| Savvides2013Phase           | 2      | 20          | 0.100        | [0.012; 0.317]        |
| Schwandt2014Randomized      | 2      | 13          | 0.154        | [0.019; 0.454]        |
| <b>Random effects model</b> |        | <b>2693</b> | <b>0.074</b> | <b>[0.055; 0.099]</b> |

Heterogeneity: I-squared=71%, tau-squared=0.7696, p<0.0001

| Study                       | Events | Total       | Proportion   | 95%-CI                |
|-----------------------------|--------|-------------|--------------|-----------------------|
| <b>phase_meta = p3</b>      |        |             |              |                       |
| Cheng2009Efficacy           | 5      | 149         | 0.034        | [0.011; 0.077]        |
| Escudier2007Sorafenib       | 44     | 451         | 0.098        | [0.072; 0.129]        |
| Llovet2008Sorafenib         | 7      | 297         | 0.024        | [0.010; 0.048]        |
| Brose2014Sorafenib          | 24     | 196         | 0.122        | [0.080; 0.177]        |
| <b>Random effects model</b> |        | <b>1093</b> | <b>0.061</b> | <b>[0.031; 0.117]</b> |

Heterogeneity: I-squared=86%, tau-squared=0.4242, p<0.0001

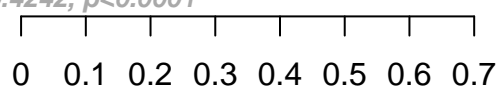

Supplement: pbio.2000487.s004.pdf [file pbio.2000487.s004.pdf]
