# Supplementary material for: Inefficiencies and Patient Burdens in the Development of the Targeted Cancer Drug Sorafenib: A Systematic Review
Source: PubMed Central journal article supplement (PMC5291369; doi:10.1371/journal.pbio.2000487), 2017-02-03
Supplement: pbio.2000487.s008.pdf [file pbio.2000487.s008.pdf]

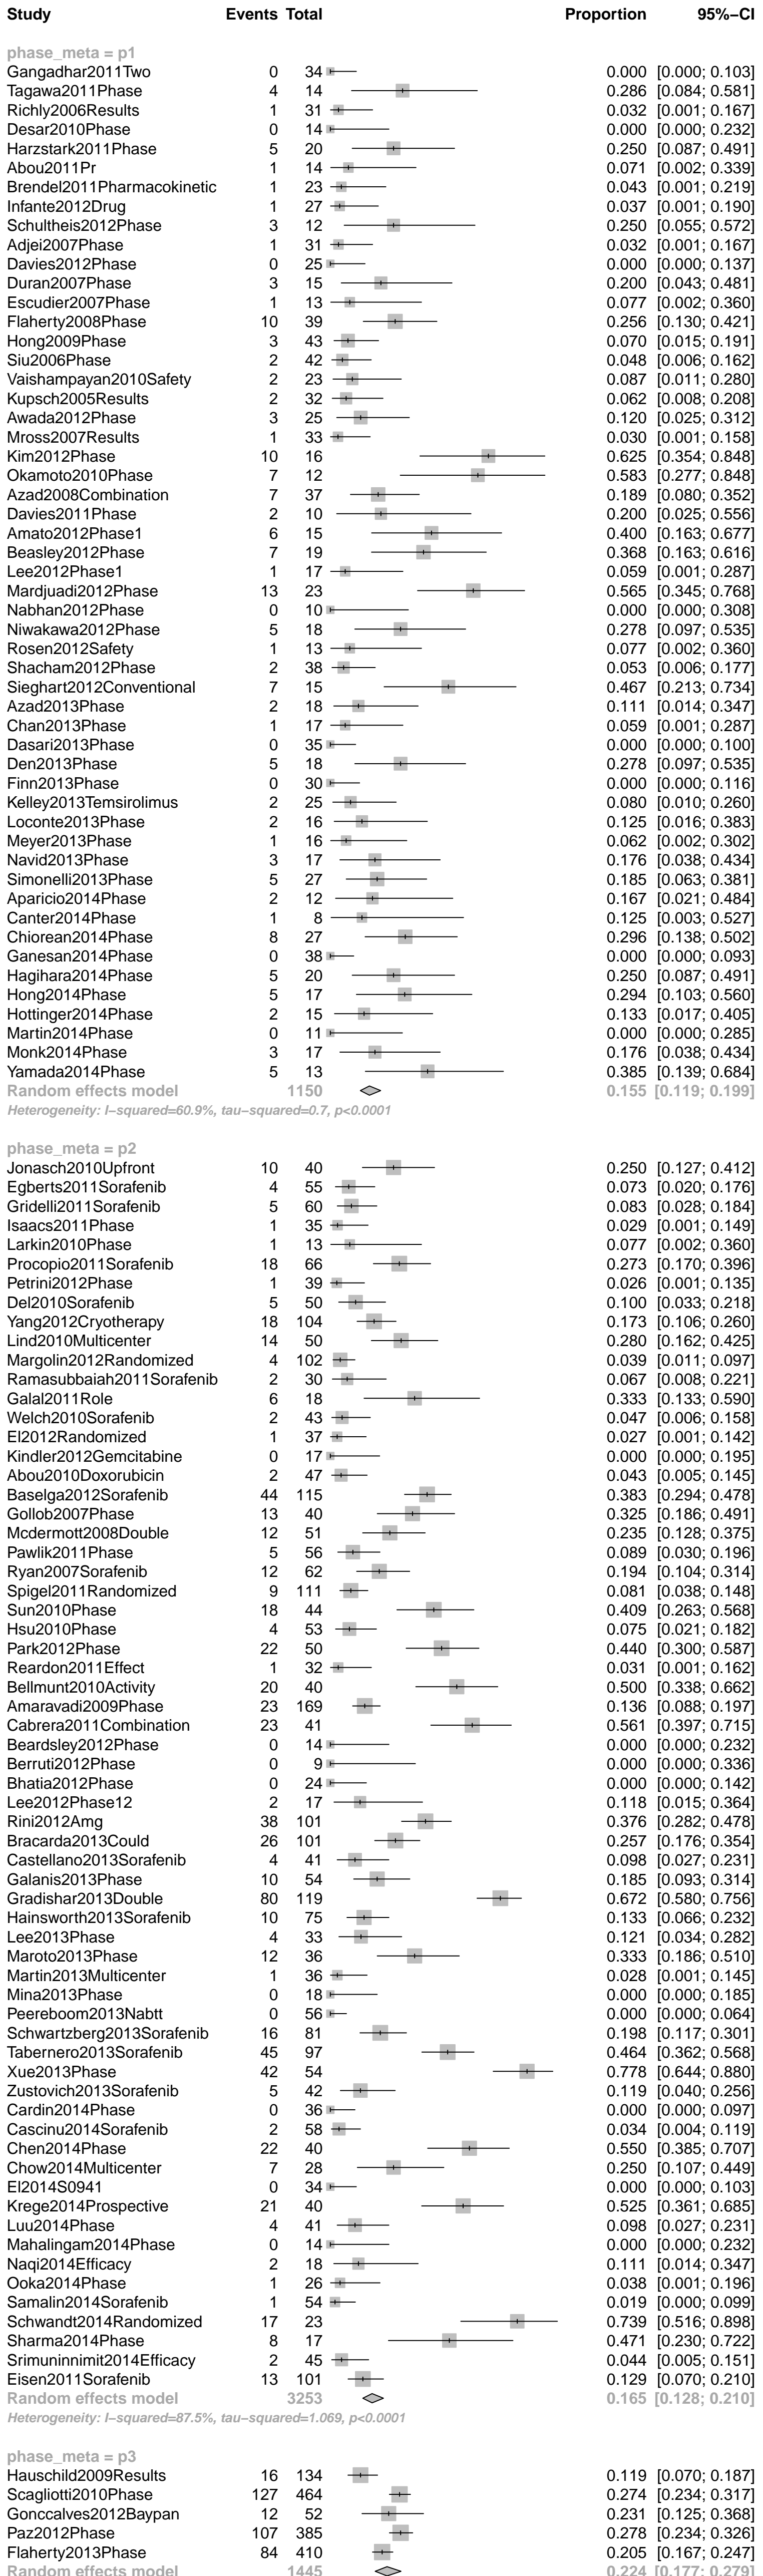

0 0.2 0.4 0.6 0.8
