# Supplementary material for: Inefficiencies and Patient Burdens in the Development of the Targeted Cancer Drug Sorafenib: A Systematic Review
Source: PLoS Biol. 2017 Feb 3;15(2):e2000487. doi: 10.1371/journal.pbio.2000487 (PMC5291369; doi:10.1371/journal.pbio.2000487)
Supplement: S1 Data — (XLSX) [file pbio.2000487.s016.xlsx]

## Sheet: Dataset
id	title	authors	year	pub_month	journal	abstract	databaseid	indication	Primary 1	Primary 2	Primary 3	monotherapy	combination_therapy	phase	sponsor	single_or_multi_centre	location_of_corr_author	continent	primary_endpoint	toxicity_described	monotherapy	combination_therapy	comparator	combination_1	combination_2	comparator_1	comparator_2	comparator_3	mono_and_combo	drug_n	drug_n_monotherapy	drug_n_combination_therapy	orr_n	orr_monotherapy	orr_combination_therapy	include_orr	marginal_check	duplicative	lack_follow_up	accrual_failure	subindication	random	double_blind	date_of_enrolment_all	date_of_closure_all	earliest_date	duration_of_enrolment_all	g5_sorafenib	g5_mono_sorafenib
157	Two drug interaction studies of sirolimus in combination with sorafenib or sunitinib in patients with advanced malignancies	T. C. Gangadhar, E. E. W. Cohen, K. Wu, L. Janisch, D. Geary, M. Kocherginsky, L. K. House, J. Ramirez, S. D. Undevia, M. L. Maitland, G. F. Fleming and M. J. Ratain	2011	2011-03-01	Clinical Cancer Research	PURPOSE: Sirolimus is the prototypical mTOR inhibitor. Sorafenib and sunitinib are small molecule inhibitors of multiple kinases including VEGF receptor (VEGFR) kinases. These agents have different mechanisms of action, providing a strong rationale for combination. EXPERIMENTAL DESIGN: Patients with advanced cancer were assigned to receive either sirolimus or the VEGFR inhibitor alone for a 2-wee…	21447721	Mixed	PK profile			0	1	p1	non-industry	not_stated	United States	N America	positive	acceptable	0	1	0	Sirolimus						34		34	0		0	1					Pathologically confirmed advanced solid tumors and progressive disease after standard therapy	no	no	NULL	NULL	2011-03-01	8	0
647	A phase I open-label study evaluating the cardiovascular safety of sorafenib in patients with advanced cancer	A. W. Tolcher, L. J. Appleman, G. I. Shapiro, A. C. Mita, F. Cihon, A. Mazzu and P. R. Sundaresan	2011	2010-06-01	Cancer Chemotherapy & Pharmacology	PURPOSE: To characterize the cardiovascular profile of sorafenib, a multitargeted kinase inhibitor, in patients with advanced cancer. METHODS: Fifty-three patients with advanced cancer received oral sorafenib 400 mg bid in continuous 28-day cycles in this open-label study. Left ventricular ejection fraction (LVEF) was evaluated using multigated acquisition scanning at baseline and after 2 and 4 c…	20521052	Mixed	LVEF, QT/QTc interval, BP, and HR (cardiovascular)			1	0	p1	industry	multi	United States	N America	positive	acceptable	1	0	0							48	48		1	1		1					RCC, Squamous cell carcinoma, Duct cell adenocarcinoma, Papillary carcinoma (thyroid), Mesothelioma, Bone sarcoma, Non–small cell lung carcinoma, Prostate cancer	no	no	2005-08-01	2007-02-01	2005-08-01	16	0	0
650	Evaluation of KRAS mutations, angiogenic biomarkers, and DCE-MRI in patients with advanced non-small-cell lung cancer receiving sorafenib	R. J. Kelly, A. Rajan, J. Force, A. Lopez-Chavez, C. Keen, L. Cao, Y. Yu, P. Choyke, B. Turkbey, M. Raffeld, L. Xi, S. M. Steinberg, J. J. Wright, S. Kummar, M. Gutierrez and G. Giaccone	2011	2011-01-01	Clinical Cancer Research	PURPOSE: Sorafenib, a multikinase inhibitor targeting Raf and VEGFR, has shown activity in unselected patients with non-small-cell lung cancer (NSCLC). At present there are no validated biomarkers indicative of sorafenib activity. EXPERIMENTAL DESIGN: Patients received sorafenib 400 mg BID daily to determine activity and tolerability and to measure its biological effects. KRAS mutation status (N …	21224376	NSCLC	ORR	Safety		1	0	p2	non-industry	single	United States	N America	negative	acceptable	1	0	0							34	34		2	2		1					Advanced Non–Small-Cell Lung Cancer	no	no	2005-01-01	2009-12-01	2005-01-01	14	0	0
673	Upfront, randomized, phase 2 trial of sorafenib versus sorafenib and low-dose interferon alfa in patients with advanced renal cell carcinoma: clinical and biomarker analysis	E. Jonasch, P. Corn, L. C. Pagliaro, C. L. Warneke, M. M. Johnson, P. Tamboli, C. Ng, A. Aparicio, R. G. Ashe, J. J. Wright and N. M. Tannir	2010	2009-10-01	Cancer	BACKGROUND: The objective of this study was to independently evaluate the objective response rate of sorafenib and sorafenib plus low-dose interferon-alfa 2b (IFN) as frontline therapy in patients with metastatic renal cell carcinoma (mRCC). METHODS: Untreated patients with clear cell mRCC were randomized to receive sorafenib 400 mg orally twice daily or sorafenib 400 mg orally twice daily plus s…	19862815	RCC	ORR	Safety		1	1	p2	non-industry	single	United States	N America	positive	acceptable	1	1	0	IFN-a2b					1	80	40	40	22	12	10	1	1	1			Advanced RCC	yes	no	2005-06-01	2007-06-01	2005-06-01	24	0	0
680	A phase I trial of sorafenib plus gemcitabine and capecitabine for patients with advanced renal cell carcinoma: New York Cancer Consortium Trial NCI 6981	S. T. Tagawa, M. I. Milowsky, S. Jeske, M. Mazumdar, S. Kung, M. Sung, D. Lehrer, D. Matulich, J. Selzer, J. J. Wright and D. M. Nanus	2011	2011-10-01	American Journal of Clinical Oncology	OBJECTIVE: To define the safety [dose limiting toxicity (DLT)] and recommended phase II dose of the combination of sorafenib plus gemcitabine and capecitabine for advanced renal cell carcinoma (RCC). METHODS: In this phase I dose-escalation study, cohorts of 3 to 6 patients with metastatic RCC received sorafenib (200 or 400 mg po BID), gemcitabine (750 or 1000 mg/m(2) intravenous on days 1 and 8)…	20881475	RCC	RP2D	Safety		0	1	p1	non-industry	multi	United States	N America	positive	acceptable	0	1	0	Capecitabine + Gemcitabine						14		14	4		4	1					Advanced RCC	no	no	2005-06-01	2007-08-01	2005-06-01	21	0
681	A phase II study of sorafenib in patients with chemo-naive castration-resistant prostate cancer	K. N. Chi, S. L. Ellard, S. J. Hotte, P. Czaykowski, M. Moore, J. D. Ruether, A. J. Schell, S. Taylor, C. Hansen, I. Gauthier, W. Walsh and L. Seymour	2008	2007-12-01	Annals of Oncology	BACKGROUND: The purpose of this trial was to evaluate the antitumor activity of sorafenib, a multikinase inhibitor of cell proliferation and angiogenesis, in patients with castration-resistant prostate cancer. PATIENTS AND METHODS: This was a multicenter, two-stage, phase II study. Sorafenib 400 mg was administered orally twice daily continuously. Primary end point was prostate-specific antigen (…	18056648	Prostate	PSA response			1	0	p2	non-industry	multi	Canada	N America	negative	acceptable	1	0	0							8	8		0	0		1					Castration-resistant prostate cancer	no	no	2004-07-01	2005-12-01	2004-07-01	8	0	0
682	Sorafenib and pegylated interferon-alpha2b in advanced metastatic melanoma: a multicenter phase II DeCOG trial	F. Egberts, R. Gutzmer, S. Ugurel, J. C. Becker, U. Trefzer, A. Degen, F. Schenck, L. Frey, T. Wilhelm, J. C. Hassel, D. Schadendorf, E. Livingstone, C. Mauch, C. Garbe, C. Berking, K. Rass, P. Mohr, K. C. Kaehler, M. Weichenthal and A. Hauschild	2011	2011-01-01	Annals of Oncology	BACKGROUND: The combination of sorafenib, a multikinase inhibitor, and pegylated interferon-alpha2b (Peg-IFN-alpha2b) could potentially lead to an improved antitumoral response. Previously, combinations of interferon and sorafenib have been used in renal cell cancer. PATIENTS AND METHODS: Patients with stage IV metastatic melanoma and no previous systemic therapies apart from adjuvant immunothera…	21220519	Melanoma	DCR-8			0	1	p2	industry	multi	Germany	Europe	negative	unacceptable	0	1	0	IFN-a2b						55		55	4		4	1					advanced, metastatic, SSM, NM, LMM, ALM	no	no	2008-02-01	2009-02-01	2008-02-01	8	4
683	Sorafenib in combination with erlotinib or with gemcitabine in elderly patients with advanced non-small-cell lung cancer: a randomized phase II study	C. Gridelli, F. Morgillo, A. Favaretto, F. de Marinis, A. Chella, G. Cerea, R. Mattioli, G. Tortora, A. Rossi, M. Fasano, G. Pasello, S. Ricciardi, P. Maione, M. Di Maio and F. Ciardiello	2011	2011-01-01	Annals of Oncology	BACKGROUND: Sorafenib is a small-molecule multitargeted kinase inhibitor that blocks the activation of C-RAF, B-RAF, c-KIT, FLT-3, RET, vascular endothelial growth factor receptor 2 (VEGFR-2), VEGFR-3 and platelet-derived growth factor receptor beta. The aim of this multicenter, randomized phase II study was to evaluate clinical activity and safety of sorafenib in combination with erlotinib or ge…	21212155	NSCLC	OS-12			0	1	p2	non-industry	multi	Italy	Europe	positive	acceptable	0	1	0	Gemcitabine	Erlotinib					60		60	5		5	1	1		1		Advanced NSCLC	yes	no	2007-09-01	2009-05-01	2007-09-01	52	2
684	Phase I study to determine the safety and pharmacokinetics of the novel Raf kinase and VEGFR inhibitor BAY 43-9006, administered for 28 days on/7 days off in patients with advanced, refractory solid tumors	M. Moore, H. W. Hirte, L. Siu, A. Oza, S. J. Hotte, O. Petrenciuc, F. Cihon, C. Lathia and B. Schwartz	2005	2005-07-01	Annals of Oncology	BACKGROUND: BAY 43--9006, an oral multi-kinase inhibitor, targets serine-threonine kinases and receptor tyrosine kinases, and affects the tumor and vasculature in preclinical models. Based on its pharmacologic effect, it may be a useful cancer treatment. This study determined the maximum tolerated dose (MTD) of BAY 43-9006 in 42 patients with advanced, refractory metastatic or recurrent solid tum…	16006586	Mixed	MTD			1	0	p1	ns	multi	Canada	N America	positive	acceptable	1	0	0							41	41		0	0		1					Refractory Colon, Ovarian, Peritoneal, Pancreatic, Kidney, Cervical, Breast Uterine, Pharynx cancer	no	no	2000-12-01	2003-01-01	2000-12-01	10	0	0
685	Results of a Phase I trial of sorafenib (BAY 43-9006) in combination with doxorubicin in patients with refractory solid tumors	H. Richly, B. F. Henning, P. Kupsch, K. Passarge, M. Grubert, R. A. Hilger, O. Christensen, E. Brendel, B. Schwartz, M. Ludwig, C. Flashar, R. Voigtmann, M. E. Scheulen, S. Seeber and D. Strumberg	2006	2006-02-01	Annals of Oncology	BACKGROUND: Sorafenib (BAY 43-9006), a novel, oral multi-kinase inhibitor, blocks serine/threonine and receptor tyrosine kinases in the tumor and vasculature. Sorafenib demonstrated single-agent activity in Phase I studies, and was tolerated and inhibited tumor growth in combination with doxorubicin in preclinical studies. This Phase I dose-escalation study determined the safety, pharmacokinetics…	16500908	Mixed	Safety			0	1	p1	ns	not_stated	Germany	Europe	positive	acceptable	0	1	0	Doxorubicin						31		31	1		1	1					Refractory Colon, Pancreatic, Hepatic, Lung, Breast, Renal carcinomas	no	no	NULL	NULL	2006-02-01	20	0
686	Phase II multicenter, uncontrolled trial of sorafenib in patients with metastatic breast cancer	G. Bianchi, S. Loibl, C. Zamagni, S. Salvagni, G. Raab, S. Siena, N. Laferriere, C. Pena, C. Lathia, L. Bergamini and L. Gianni	2009	2009-08-01	Anti-Cancer Drugs	This trial was conducted to assess the efficacy and safety of sorafenib in patients with metastatic breast cancer. In this multinational, open-label phase II study, patients with metastatic breast cancer that had progressed after at least one prior chemotherapy regimen were continuously treated with oral sorafenib, 400 mg twice daily. The primary endpoint was overall best response; a secondary en…	19739318	Breast	ORR			1	0	p2	industry	multi	Italy	Europe	negative	acceptable	1	0	0							54	54		1	1		1					MBC	no	no	2004-02-01	2004-07-01	2004-02-01	9	0	0
692	Phase I/II study of sorafenib with anastrozole in patients with hormone receptor positive aromatase inhibitor resistant metastatic breast cancer	C. Isaacs, P. Herbolsheimer, M. C. Liu, M. Wilkinson, Y. Ottaviano, G. G. Chung, R. Warren, J. Eng-Wong, P. Cohen, K. L. Smith, K. Creswell, A. Novielli and R. Slack	2011	2010-10-01	Breast Cancer Research & Treatment	We evaluated the use of sorafenib to overcome resistance to aromatase inhibitors (AIs) in patients with metastatic breast cancer who had disease recurrence or progression while on AIs. We performed a multi-institution phase I/II study of sorafenib and anastrozole 1 mg daily in 35 postmenopausal females with hormone receptor positive metastatic breast cancer resistant to AIs. Primary objectives we…	20976541	Breast	CBR	MTD		0	1	p1-2	non-industry	multi	United States	N America	inconclusive	unacceptable	0	1	0	Anastrozole						35		35	1		1	1					Hormone receptor positive aromatase inhibitor resistant metastatic breast cancer	no	no	2005-07-01	2009-05-01	2005-07-01	24	0
693	Phase I safety and pharmacokinetics of BAY 43-9006 administered for 21 days on/7 days off in patients with advanced, refractory solid tumours	A. Awada, A. Hendlisz, T. Gil, S. Bartholomeus, M. Mano, D. de Valeriola, D. Strumberg, E. Brendel, C. G. Haase, B. Schwartz and M. Piccart	2005	2005-05-01	British Journal of Cancer	BAY 43-9006 is a novel dual-action Raf kinase and vascular endothelial growth factor receptor (VEGFR) inhibitor that targets tumour cell proliferation and tumour angiogenesis. This Phase I study was undertaken to determine the safety profile, maximum tolerated dose (MTD), dose-limiting toxicities (DLTs), pharmacokinetics, and tumour response profile of oral BAY 43-9006 in patients with advanced, …	15870716	Mixed	MTD			1	0	p1	industry	single	Belgium	Europe	positive	acceptable	1	0	0							32	32		1	1		1					Advanced, refractory solid tumors: Colon, Breast, Kidney, Ovary, Liver, Gastrointestinal (other), Head and Neck, Lung, Melanoma	no	no	2000-12-01	2002-12-01	2000-12-01	6	0	0
694	Sorafenib in patients with advanced biliary tract carcinoma: a phase II trial	C. Bengala, F. Bertolini, N. Malavasi, C. Boni, E. Aitini, C. Dealis, S. Zironi, R. Depenni, A. Fontana, C. Del Giovane, G. Luppi and P. Conte	2010	2009-11-01	British Journal of Cancer	BACKGROUND: Advanced biliary tract carcinoma has a very poor prognosis, with chemotherapy being the mainstay of treatment. Sorafenib, a multikinase inhibitor of VEGFR-2/-3, PDGFR-beta, B-Raf, and C-Raf, has shown to be active in preclinical models of cholangiocarcinoma. METHODS: We conducted a phase II trial of single-agent sorafenib in patients with advanced biliary tract carcinoma. Sorafenib wa…	19935794	Biliary tract	DCR-12 weeks			1	0	p2	industry	multi	Italy	Europe	inconclusive	acceptable	1	0	0							46	46		1	1		1					Advanced or unresectable biliary tract carcinoma	no	no	2006-08-01	2007-12-01	2006-08-01	12	0	0
695	A phase I dose-escalation study to evaluate safety and tolerability of sorafenib combined with sirolimus in patients with advanced solid cancer	I. M. E. Desar, J. N. H. Timmer-Bonte, D. M. Burger, W. T. A. van der Graaf and C. M. L. van Herpen	2010	2010-11-01	British Journal of Cancer	BACKGROUND: The combination of sorafenib (vascular endothelial growth factor receptor 2 inhibitor) and sirolimus (mammalian target of rapamycin inhibitor) might work synergistically. METHODS: A phase I dose-escalation study with sorafenib twice a day (b.i.d.) and sirolimus once daily (q.d.) was performed to determine the recommended dose of the combination in patients with solid tumours. Secondar…	21045832	Mixed	RP2D			0	1	p1	ns	not_stated	Netherlands	Europe	negative	unacceptable	0	1	0	Sirolimus						14		14	0		0	1					Refractory, advanced solid tumors	no	no	2007-07-01	2009-05-01	2007-07-01	8	0
696	Sorafenib in advanced melanoma: a Phase II randomised discontinuation trial analysis	T. Eisen, T. Ahmad, K. T. Flaherty, M. Gore, S. Kaye, R. Marais, I. Gibbens, S. Hackett, M. James, L. M. Schuchter, K. L. Nathanson, C. Xia, R. Simantov, B. Schwartz, M. Poulin-Costello, P. J. O'Dwyer and M. J. Ratain	2006	2006-08-01	British Journal of Cancer	The effects of sorafenib--an oral multikinase inhibitor targeting the tumour and tumour vasculature--were evaluated in patients with advanced melanoma enrolled in a large multidisease Phase II randomised discontinuation trial (RDT). Enrolled patients received a 12-week run-in of sorafenib 400 mg twice daily (b.i.d.). Patients with changes in bi-dimensional tumour measurements <25% from baseline w…	16880785	Melanoma	PFS-24 weeks			1	0	p2	ns	multi	United Kingdom	Europe	negative	acceptable	1	0	1			Placebo				37	37		0	0		1					advanced unresectable or metastatic melanoma	yes	yes	2002-09-01	NULL	2002-09-01	24	0	0
697	A phase I/II trial of sorafenib and infliximab in advanced renal cell carcinoma	J. M. G. Larkin, T. R. Ferguson, L. M. Pickering, K. Edmonds, M. G. James, K. Thomas, U. Banerji, B. Berns, C. de Boer and M. E. Gore	2010	2010-09-01	British Journal of Cancer	BACKGROUND: There is clinical evidence to suggest that tumour necrosis factor-alpha (TNF-alpha) may be a therapeutic target in renal cell carcinoma (RCC). Multi-targeted kinase inhibitors, such as sorafenib and sunitinib, have become standard of care in advanced RCC. The anti-TNF-alpha monoclonal antibody infliximab and sorafenib have differing cellular mechanisms of action. We conducted a phase …	20842130	RCC	PFS-6			0	1	p1-2	industry	single	United Kingdom	Europe	negative	unacceptable	0	1	0	Infliximab						13		13	1		1	1					Advanced RCC	no	no	2007-06-01	2009-02-01	2007-06-01	26	0
699	Sorafenib with interleukin-2 vs sorafenib alone in metastatic renal cell carcinoma: the ROSORC trial	G. Procopio, E. Verzoni, S. Bracarda, S. Ricci, C. Sacco, L. Ridolfi, C. Porta, R. Miceli, N. Zilembo and E. Bajetta	2011	2011-03-01	British Journal of Cancer	BACKGROUND: Preclinical investigations support combining sorafenib with IL-2 in the treatment of metastatic renal cell carcinoma (mRCC). METHODS: In this open-label, phase II study, 128 patients with mRCC were randomised to receive oral sorafenib, 400[THIN SPACE]mg twice daily, plus subcutaneous IL-2, 4.5 million international units (MIU) five times per week for 6 in every 8 weeks, or sorafenib a…	21448165	RCC	PFS			0	1	p2	industry	multi	Italy	Europe	negative	na	0	1	0	IL-2					1	66		66	18		18	1					Untreated patients with unresectable or metastatic RCC	yes	no	2006-10-01	2008-02-01	2006-10-01	32	0
700	A clinical phase II study with sorafenib in patients with progressive hormone-refractory prostate cancer: a study of the CESAR Central European Society for Anticancer Drug Research-EWIV	S. Steinbild, K. Mross, A. Frost, R. Morant, S. Gillessen, C. Dittrich, D. Strumberg, A. Hochhaus, A. R. Hanauske, L. Edler, I. Burkholder and M. Scheulen	2007	2007-11-01	British Journal of Cancer	Sorafenib is a multi-kinase inhibitor with antiangiogenic and antiproliferative activity. The activity of sorafenib in progressive hormone-refractory prostate cancer (HRPC) patients was investigated in a phase II clinical study. Progressive HRPC patients received sorafenib 400 mg bid p.o. continuously. Only patients with no prior chemotherapy, and either one-unidimensional measurable lesion accor…	18040273	Prostate	PFS-12 weeks			1	0	p2	non-industry	multi	Germany	Europe	positive	acceptable	1	0	0							55	55		0	0		1	1	1			Progressive HRPC	no	no	2004-08-01	2005-06-01	2004-08-01	12	0	0
701	Phase 2 trial of sorafenib in patients with advanced urothelial cancer: a trial of the Eastern Cooperative Oncology Group	R. Dreicer, H. Li, M. Stein, R. DiPaola, M. Eleff, B. J. Roth and G. Wilding	2009	2009-06-01	Cancer	BACKGROUND: There is no effective second-line systemic chemotherapy for patients with disease progression after cisplatin-based chemotherapy. A phase 2 trial of sorafenib was performed to determine the activity and toxicity of this agent in a multi-institutional setting in patients previously treated with 1 prior chemotherapy regimen. METHODS: Twenty-seven patients with advanced urothelial carcin…	19536901	Urothelial	PFS-4			1	0	p2	non-industry	multi	United States	N America	negative	acceptable	1	0	0							22	22		0	0		1					histologically confirmed transitional cell carcinoma (or mixed histologies containing a compo- nent of transitional cell carcinoma) of the urothelium with evidence of progressive, bidimensionally meas	no	no	2005-10-01	2006-10-01	2005-10-01	8	0	0
702	A front-line window of opportunity phase 2 study of sorafenib in patients with advanced nonsmall cell lung cancer: North Central Cancer Treatment Group Study N0326	G. K. Dy, S. L. Hillman, K. M. Rowland, Jr., J. R. Molina, P. D. Steen, D. B. Wender, S. Nair, S. Mandrekar, S. E. Schild, A. A. Adjei and N. North Central Cancer Treatment Group Study	2010	2010-08-01	Cancer	BACKGROUND: The current study was conducted to assess the efficacy and toxicity of sorafenib as front-line therapy in patients with stage IIIB (pleural effusion) or IV nonsmall cell lung cancer (NSCLC). METHODS: Patients received sorafenib 400 mg twice daily by mouth continuously, and were evaluated every 2 weeks during the first 8 weeks. Patients who manifested clinical progression during this p…	21218460	NSCLC	ORR			1	0	p2	non-industry	multi	United States	N America	negative	acceptable	1	0	0							25	25		3	3		1					Advanced NSCLC	no	no	2004-12-01	2005-06-01	2004-12-01	12	0	0
705	A phase 1 study of everolimus and sorafenib for metastatic clear cell renal cell carcinoma	A. L. Harzstark, E. J. Small, V. K. Weinberg, J. Sun, C. J. Ryan, A. M. Lin, L. Fong, D. R. Brocks and J. E. Rosenberg	2011	2011-03-01	Cancer	BACKGROUND: The current study was conducted to assess the maximum tolerated dose (MTD), safety, pharmacokinetics, and preliminary antitumor effect of everolimus, a mammalian target of rapamycin inhibitor, in combination with sorafenib, a tyrosine kinase inhibitor, in patients with metastatic clear cell renal cell carcinoma. METHODS: Sequential cohorts of patients received escalating doses of ever…	21387258	RCC	Safety profile			0	1	p1	industry	not_stated	United States	N America	positive	acceptable	0	1	0	Everolimus						20		20	5		5	1					Metastatic clear cell RCC	no	no	NULL	NULL	2011-03-01	16	0
707	Phase 2 Southwest Oncology Group-directed intergroup trial (S0505) of sorafenib in advanced soft tissue sarcomas	M. von Mehren, C. Rankin, J. R. Goldblum, G. D. Demetri, V. Bramwell, C. W. Ryan and E. Borden	2012	2011-07-01	Cancer	BACKGROUND: Patients with advanced soft tissue sarcomas (STS) have limited therapeutic options. Sorafenib (BAY 43-9006) is a multitargeted tyrosine kinase inhibitor of raf, vascular endothelial growth factor receptors 1 (VEGFR1) through 3, platelet-derived growth factor B, fms-like tyrosine kinase 3, and c-kit, and some of these may be relevant in STS. METHODS: The authors tested sorafenib at a d…	21751200	Soft tissue sarcoma	ORR			1	0	p2	non-industry	multi	United States	N America	negative	acceptable	1	0	0							37	37		0	0		1	1			1	residual, recurrent, or metastatic vascular sarcomas (cutaneous or visceral angiosarcoma, malignant hemangiosarcoma, solitary fibrous tumor), or grade 3/4 liposarcoma or leiomyosarcoma	no	no	2006-03-01	2007-02-01	2006-03-01	14	0	0
708	Phase 2 open-label study of single-agent sorafenib in treating advanced hepatocellular carcinoma in a hepatitis B-endemic Asian population: presence of lung metastasis predicts poor response	T. Yau, P. Chan, K. K. Ng, S. H. Chok, T. T. Cheung, S. T. Fan and R. T. Poon	2009	2008-12-01	Cancer	BACKGROUND: The current study was a phase 2 open-label study to evaluate the efficacy and tolerability of single-agent sorafenib in the treatment of advanced HCC patients in a hepatitis B-endemic Asian population. METHODS: Patients with advanced hepatocellular carcinoma (HCC) received sorafenib at a dose of 400 mg twice daily in 4-week cycles. Tumor response was assessed every 3 cycles using Resp…	19107763	HCC	OS			1	0	p2	non-industry	single	China	Asia	positive	acceptable	1	0	0							51	51		4	4		1					Hepatocellular Carcinoma in a Hepatitis B–endemic Asian Population	no	no	2006-11-01	2008-01-01	2006-11-01	13	0	0
709	PR-104 plus sorafenib in patients with advanced hepatocellular carcinoma	G. K. Abou-Alfa, S. L. Chan, C.-C. Lin, E. G. Chiorean, R. F. Holcombe, M. F. Mulcahy, W. D. Carter, K. Patel, W. R. Wilson, T. J. Melink, J. C. Gutheil and C.-J. Tsao	2011	2011-05-01	Cancer Chemotherapy & Pharmacology	PURPOSE: PR-104 is activated by reductases under hypoxia or by aldo-keto reductase 1C3 (AKR1C3) to form cytotoxic nitrogen mustards. Hepatocellular carcinoma (HCC) displays extensive hypoxia and expresses AKR1C3. This study evaluated the safety and efficacy of PR-104 plus sorafenib in HCC. METHODS: Patients with advanced-stage HCC, Child-Pugh A cirrhosis, and adequate organ function, were assigne…	21594722	HCC	ORR	Safety		0	1	p1	ns	multi	United States	N America	negative	unacceptable	0	1	0	PR-104						14		14	1		1	1					Advanced HCC	no	no	2009-04-01	2009-12-01	2009-04-01	8	0
710	Pharmacokinetic results of a phase I trial of sorafenib in combination with dacarbazine in patients with advanced solid tumors	E. Brendel, M. Ludwig, C. Lathia, C. Robert, S. Ropert, J.-C. Soria and J.-P. Armand	2011	2010-09-01	Cancer Chemotherapy & Pharmacology	PURPOSE: Sorafenib, a multikinase inhibitor of Raf and several growth factor receptors, is under investigation in combination with dacarbazine, a commonly used chemotherapeutic agent for the treatment of many cancers. The current phase I study investigates the effects of sorafenib on the pharmacokinetic (PK) profile of dacarbazine and its metabolite 5-amino-imidazole-4-carboxamide (AIC). (AIC is …	20821331	Mixed	PK profile			0	1	p1	industry	single	Germany	Europe	positive	acceptable	0	1	0	Dacarbazine						23		23	1		1	1					Advanced Melanoma, Leiomyosarcoma, Adenocarcinoma, Epithelioid mesothelioma, Neuroendocrine carcinoma, Carcinoid tumor, Hepatocarcinoma, Sarcoma, Hemangiopericytoma, Nesidioblastoma	no	no	2005-09-01	2006-08-01	2005-09-01	15	0
711	Interaction of sorafenib and cytochrome P450 isoenzymes in patients with advanced melanoma: a phase I/II pharmacokinetic interaction study	K. T. Flaherty, C. Lathia, R. F. Frye, L. Schuchter, M. Redlinger, M. Rosen and P. J. O'Dwyer	2011	2011-02-01	Cancer Chemotherapy & Pharmacology	BACKGROUND: In vitro data indicate that the sorafenib is a moderate inhibitor of cytochrome P450 (CYP) enzymes, including CYP3A4, CYP2C19, and CYP2D6. This phase I/II study in patients with advanced melanoma evaluated the potential effect of sorafenib on the pharmacokinetics of midazolam, omeprazole, and dextromethorphan, specific substrates of CYP3A4, CYP2C19, and CYP2D6, respectively. METHODS: …	21350850	Melanoma	PK profile			1	0	p1-2	industry	single	United States	N America	positive	acceptable	1	0	0							18			0			NO-ORR	1	1			Biopsy-amenable metastatic melanoma	no	no	2003-11-01	2008-12-01	2003-11-01	4	0	0
712	A drug interaction study evaluating the pharmacokinetics and toxicity of sorafenib in combination with capecitabine	J. R. Infante, S. F. Jones, J. C. Bendell, F. A. Greco, D. A. Yardley, C. M. Lane, D. R. Spigel, J. D. Hainsworth and H. A. Burris, 3rd	2012	2011-05-01	Cancer Chemotherapy & Pharmacology	PURPOSE: To address tolerability and a possible pharmacologic interaction of capecitabine with sorafenib. METHODS: Patients with advanced solid tumors (ECOG PS 0-1) were included. Cohort A received capecitabine 750[NON-BREAKING SPACE]mg/m(2) BID and Cohort B received capecitabine 1,000[NON-BREAKING SPACE]mg/m(2) BID, both for 14[NON-BREAKING SPACE]days of a 21-day cycle. Steady-state PK was obtai…	21626051	Mixed	PK profile	Safety		0	1	p1	industry	single	United States	N America	negative	unacceptable	0	1	0	Capecitabine						27		27	1		1	1					Advanced solid tumors	yes	no	2008-02-01	2009-04-01	2008-02-01	6	0
713	Phase II trial of sorafenib in combination with 5-fluorouracil infusion in advanced hepatocellular carcinoma	I. Petrini, M. Lencioni, M. Ricasoli, M. Iannopollo, C. Orlandini, F. Oliveri, C. Bartolozzi and S. Ricci	2012	2011-10-01	Cancer Chemotherapy & Pharmacology	PURPOSE: Sorafenib improves overall survival and time to progression of advanced hepatocellular (aHCC) patients such as demonstrated in 2 phase III trials. However, aHCC patients' outcome is still poor despite these results. In order to improve the efficacy of systemic treatment for aHCC, we evaluated the combination of sorafenib plus 5-fluorouacil infusion in a phase II trial. METHODS: Patients …	22033636	HCC	DCR			0	1	p2	industry	single	Italy	Europe	negative	acceptable	0	1	0	5-FU						39		39	1		1	1	1			1	Advanced HCC	no	no	2006-10-01	2008-11-01	2006-10-01	20	1
714	Sorafenib in combination with carboplatin and paclitaxel as neoadjuvant chemotherapy in patients with advanced ovarian cancer	M. Polcher, M. Eckhardt, C. Coch, M. Wolfgarten, K. Kubler, G. Hartmann, W. Kuhn and C. Rudlowski	2010	2010-03-01	Cancer Chemotherapy & Pharmacology	PURPOSE: Sorafenib is a novel oral anticancer agent targeting signal transduction and angiogenic pathways through inhibitory effects against MAP kinases and vascular endothelial growth factor receptor-2. The objectives of this neoadjuvant phase II-trial in patients with advanced epithelial ovarian cancer were to assess the activity and tolerability of the combination therapy of carboplatin/paclit…	20204367	Ovarian/Peritoneal	PFS			0	1	p2	ns	not_stated	Germany	Europe	negative	unacceptable	0	1	0	Carboplatin + Paclitaxel						4		4	0		0	OTHER					Advanced epithelial ovarian cancer	no	no	2007-07-01	2007-11-01	2007-07-01	12	0
715	Sorafenib plus octreotide is an effective and safe treatment in advanced hepatocellular carcinoma: multicenter phase II So.LAR. study	S. D. Prete, L. Montella, M. Caraglia, L. Maiorino, G. Cennamo, V. Montesarchio, G. Piai, A. Febbraro, L. Tarantino, E. Capasso, G. Palmieri, R. Guarrasi, M. Bianco, R. Mamone, C. Savastano, A. Pisano, B. Vincenzi, A. Sabia, A. D'Agostino, V. Faiola and R. Addeo	2010	2009-12-01	Cancer Chemotherapy & Pharmacology	PURPOSE: Advanced hepatocellular carcinoma (HCC) not eligible for local therapies has limited chances of cure. Sorafenib is a multikinase inhibitor with proven activity in advanced HCC. Octreotide is used in this setting with conflicting results. Treatment with sorafenib and long-acting octreotide was tested in advanced HCC to evaluate safety and activity. METHODS: Fifty patients with advanced HC…	20041325	HCC	ORR			0	1	p2	ns	multi	Italy	Europe	inconclusive	acceptable	0	1	0	Octreotide						50		50	5		5	1					Advanced HCC	no	no	2007-07-01	2008-07-01	2007-07-01	22	0
716	Phase IB study of sorafenib in combination with gemcitabine and cisplatin in patients with refractory solid tumors	B. Schultheis, G. Kummer, M. Zeth, E. Brendel, C. Xia, M. Kornacker and D. Strumberg	2012	2011-07-01	Cancer Chemotherapy & Pharmacology	PURPOSE: Sorafenib (BAY 43-9006), a multikinase inhibitor, has been shown to inhibit tumor growth and tumor angiogenesis by targeting Raf kinase, vascular endothelial growth factor receptor, and platelet-derived growth factor receptor. This study investigated the safety, pharmacokinetics, and preliminary efficacy of sorafenib in combination with gemcitabine and cisplatin. METHODS: Patients with a…	21735354	Mixed	Safety profile			0	1	p1	ns	single	Germany	Europe	positive	acceptable	0	1	0	Cisplatin + Gemcitabine						12		12	3		3	1					stage IIIB or stage IV NSCLC or other advanced solid tumors	no	no	2006-11-07	2007-09-26	2006-11-07	9	1
717	Phase I study of sorafenib in Japanese patients with hepatocellular carcinoma	J. Furuse, H. Ishii, K. Nakachi, E. Suzuki, S. Shimizu and K. Nakajima	2008	2007-10-01	Cancer Science	Sorafenib is an orally active multikinase inhibitor that targets serine and threonine, and tyrosine kinases that are involved in tumor-cell signal transduction and tumor angiogenesis. This phase I trial was conducted to evaluate the pharmacokinetics (PK), safety, and preliminary efficacy of sorafenib in Japanese patients with hepatocellular carcinoma (HCC) with underlying liver dysfunction. Patie…	17953709	HCC	PK Profile			1	0	p1	industry	single	Japan	Asia	positive	acceptable	1	0	0							27	27		1	1		1					HCC with underlying liver dysfunction	no	no	2004-04-01	2005-01-01	2004-04-01	20	0	0
718	Phase I and pharmacokinetic study of sorafenib, an oral multikinase inhibitor, in Japanese patients with advanced refractory solid tumors	H. Minami, K. Kawada, H. Ebi, K. Kitagawa, Y.-i. Kim, K. Araki, H. Mukai, M. Tahara, H. Nakajima and K. Nakajima	2008	2008-05-01	Cancer Science	Sorafenib is a novel oral multikinase inhibitor that targets Raf serine/threonine and receptor tyrosine kinases, and inhibits tumor cell proliferation and angiogenesis. We have conducted a phase I study of sorafenib to determine the safety, tolerability, pharmacokinetics, and potential efficacy of this agent in 31 Japanese patients with advanced refractory solid tumors. Sorafenib (100-600 mg) was…	18477034	Mixed	PK profile	Safety		1	0	p1	ns	not_stated	Japan	Asia	positive	acceptable	1	0	0							29	29		2	2		1					Advanced NSCLC, Colorectal, Renal, Gastric cancer	no	no	2002-05-24	2004-02-25	2002-05-24	6	0	0
719	Cryotherapy is Associated with Improved Clinical Outcomes of Sorafenib Therapy for Advanced Hepatocellular Carcinoma	Y. Yang, Y. Lu, C. Wang, W. Bai, J. Qu, Y. Chen, X. Chang, L. An, L. Zhou, Z. Zeng, M. Lou and J. Lv	2012	2012-04-01	Cell Biochemistry & Biophysics	We assessed the safety and efficacy of sorafenib with cryotherapy (cryoRx) in advanced hepatocellular carcinoma (HCC). One hundred four HCC patients were enrolled, who met the following criteria: (i) Barcelona Clinic Liver Cancer stage C; (ii) HCC without distant metastasis; (iii) the presence of portal vein thrombosis (PVT); (iv) Child-Pugh class A or B; and (v) life expectancy of at least 12[NO…	22477032	HCC	TTP			0	1	p2	non-industry	not_stated	China	Asia	positive	acceptable	0	1	0	Cryotherapy						104		104	18		18	1	1		1		Advanced HCC	yes	no	2008-07-01	2010-07-01	2008-07-01	33	0
722	Phase I trial of sorafenib in combination with gefitinib in patients with refractory or recurrent non-small cell lung cancer	A. A. Adjei, J. R. Molina, S. J. Mandrekar, R. Marks, J. R. Reid, G. Croghan, L. J. Hanson, J. R. Jett, C. Xia, C. Lathia and R. Simantov	2007	2007-05-01	Clinical Cancer Research	PURPOSE: To evaluate the combination of sorafenib and gefitinib in patients with advanced non-small cell lung cancer. EXPERIMENTAL DESIGN: In this dose-escalation trial, patients received oral sorafenib (200-400 mg) twice daily with gefitinib (250 mg orally) once daily to identify the recommended dose for phase II trials (RDP; part A). The pharmacokinetics of the RDP were characterized further in…	17473200	NSCLC	RP2D	Safety		0	1	p1	ns	single	United States	N America	positive	acceptable	0	1	0	Gefitinib						31		31	1		1	1					Refractory or recurrent NSCLC	yes	no	2004-02-01	2004-12-01	2004-02-01	15	0
724	Safety and pharmacokinetics of the dual action Raf kinase and vascular endothelial growth factor receptor inhibitor, BAY 43-9006, in patients with advanced, refractory solid tumors	J. W. Clark, J. P. Eder, D. Ryan, C. Lathia and H.-J. Lenz	2005	2005-08-01	Clinical Cancer Research	PURPOSE: BAY 43-9006, a novel multikinase inhibitor, prevents tumor growth by combining two antitumor activities: inhibition of both tumor cell proliferation and tumor angiogenesis. This phase I, open-label, nonrandomized, noncontrolled, single-arm, dose escalation study was done to determine the maximum tolerated dose (MTD), safety profile, pharmacokinetic variables, effect on biomarkers, and tu…	16061863	Mixed	MTD			1	0	p1	industry	multi	United States	N America	positive	acceptable	1	0	0							19	19		0	0		1					Colon, Sigmoid, Pancreas, Abdomen cancer	no	no	2000-12-01	NULL	2000-12-01	5	0	0
725	A phase II clinical trial of sorafenib in androgen-independent prostate cancer	W. L. Dahut, C. Scripture, E. Posadas, L. Jain, J. L. Gulley, P. M. Arlen, J. J. Wright, Y. Yu, L. Cao, S. M. Steinberg, J. B. Aragon-Ching, J. Venitz, E. Jones, C. C. Chen and W. D. Figg	2008	2008-01-01	Clinical Cancer Research	PURPOSE: To determine if sorafenib is associated with a 4-month probability of progression-free survival, which is consistent with 50%, as determined by clinical, radiographic, and prostate-specific antigen (PSA) criteria in patients with metastatic androgen-independent prostate cancer (AIPC). EXPERIMENTAL DESIGN: Patients with progressive metastatic AIPC were enrolled in an open-label, single-ar…	18172272	Prostate	PFS-4			1	0	p2	non-industry	single	United States	N America	negative	acceptable	1	0	0							22	22		0	0		1					Androgen-independent prostate cancer	no	no	2004-09-01	2005-04-01	2004-09-01	17	0	0
726	Phase I study of the combination of sorafenib and temsirolimus in patients with metastatic melanoma	M. A. Davies, P. S. Fox, N. E. Papadopoulos, A. Y. Bedikian, W.-J. Hwu, A. J. Lazar, V. G. Prieto, K. S. Culotta, T. L. Madden, Q. Xu, S. Huang, W. Deng, C. S. Ng, S. Gupta, W. Liu, J. E. Dancey, J. J. Wright, R. L. Bassett, P. Hwu and K. B. Kim	2012	2012-01-01	Clinical Cancer Research	PURPOSE: This phase I clinical trial was conducted to determine the safety, efficacy, and molecular effects of sorafenib with temsirolimus in patients with advanced melanoma. Patients and Methods: Patients with stage IV or unresectable or recurrent stage III melanoma and Eastern Cooperative Oncology Group performance status of 0 to 1 were eligible. Sorafenib was given orally once or twice daily a…	22223528	Melanoma	MTD	Safety		0	1	p1	non-industry	not_stated	United States	N America	negative	unacceptable	0	1	0	Temsirolimus						25		25	0		0	1					histologically confirmed stage IV or recurrent or unresectable stage III melanoma of nonuveal origin	no	no	2009-06-01	NULL	2009-06-01	8	0
727	Phase I targeted combination trial of sorafenib and erlotinib in patients with advanced solid tumors	I. Duran, S. J. Hotte, H. Hirte, E. X. Chen, M. MacLean, S. Turner, L. Duan, G. R. Pond, C. Lathia, S. Walsh, J. J. Wright, J. Dancey and L. L. Siu	2007	2007-08-01	Clinical Cancer Research	PURPOSE: Sorafenib and erlotinib are potent, orally administered receptor tyrosine kinase inhibitors with antiproliferative and antiangiogenic activities. Given their inhibitory target profile and efficacy as single agents, the combination of these drugs is of considerable interest in solid malignancies. This study aimed to determine the recommended phase II dose of this targeted combination, the…	17699864	Mixed	ORR	RP2D	PK	0	1	p1	non-industry	multi	Canada	N America	positive	acceptable	0	1	0	Erlotinib						15		15	3		3	1					Advanced solid tumors (mixed malignancies)	no	no	2005-09-01	2011-05-01	2005-09-01	8	0
728	Phase I trial of sorafenib in combination with IFN alpha-2a in patients with unresectable and/or metastatic renal cell carcinoma or malignant melanoma	B. Escudier, N. Lassau, E. Angevin, J. C. Soria, L. Chami, M. Lamuraglia, E. Zafarana, V. Landreau, B. Schwartz, E. Brendel, J.-P. Armand and C. Robert	2007	2007-03-01	Clinical Cancer Research	PURPOSE: To determine the safety, maximum tolerated dose, pharmacokinetics, and efficacy, and to evaluate biomarkers, of the multikinase inhibitor sorafenib plus IFN alpha-2a in advanced renal cell carcinoma (RCC) or melanoma. EXPERIMENTAL DESIGN: Patients received 28-day cycles of continuous, oral sorafenib twice daily and s.c. IFN thrice weekly: sorafenib 200 mg twice daily plus IFN 6 million I…	17363536	Mixed	MTD/RP2D	Safety		0	1	p1	ns	single	France	Europe	positive	acceptable	0	1	0	IFN-a2a						13		13	1		1	1					Histologically or cytologically confirmed unresectable and/or metastatic RCC or malignant melanoma, refractory to standard treatment	no	no	2004-11-01	2005-03-01	2004-11-01	12	0
729	A phase I trial of the oral, multikinase inhibitor sorafenib in combination with carboplatin and paclitaxel	K. T. Flaherty, J. Schiller, L. M. Schuchter, G. Liu, D. A. Tuveson, M. Redlinger, C. Lathia, C. Xia, O. Petrenciuc, S. R. Hingorani, M. A. Jacobetz, P. A. Van Belle, D. Elder, M. S. Brose, B. L. Weber, M. R. Albertini and P. J. O'Dwyer	2008	2008-08-01	Clinical Cancer Research	PURPOSE: This study evaluated the safety, maximum tolerated dose, pharmacokinetics, and antitumor activity of sorafenib, a multikinase inhibitor, combined with paclitaxel and carboplatin in patients with solid tumors. Patients and Methods: Thirty-nine patients with advanced cancer (24 with melanoma) received oral sorafenib 100, 200, or 400 mg twice daily on days 2 to 19 of a 21-day cycle. All pat…	18676756	Mixed	MTD	Safety		0	1	p1	non-industry	multi	United States	N America	positive	acceptable	0	1	0	Carboplatin + Paclitaxel						39		39	10		10	1					Malignant melanoma (n=24), Colon, NSCLC, Renal cancer	no	no	2002-05-01	2007-11-01	2002-05-01	35	0
730	Phase I trial of a combination of the multikinase inhibitor sorafenib and the farnesyltransferase inhibitor tipifarnib in advanced malignancies	D. S. Hong, S. M. Sebti, R. A. Newman, M. A. Blaskovich, L. Ye, R. F. Gagel, S. Moulder, J. J. Wheler, A. Naing, N. M. Tannir, C. S. Ng, S. I. Sherman, A. K. El Naggar, R. Khan, J. Trent, J. J. Wright and R. Kurzrock	2009	2009-11-01	Clinical Cancer Research	PURPOSE: We evaluated the safety, maximum tolerated dose, pharmacokinetics, and biological effects of the combination of the Raf-1, RET, KIT, platelet-derived growth factor receptor, and vascular endothelial growth factor receptor 2 kinase inhibitor sorafenib and the farnesyltransferase inhibitor tipifarnib. EXPERIMENTAL DESIGN: A standard 3 + 3 phase I dose-escalation design was used with a 28-d…	19903778	Mixed	MTD	PD	PK	0	1	p1	non-industry	not_stated	United States	N America	positive	acceptable	0	1	0	Tipifarnib						43		43	3		3	1					Advanced mixed malignancies	no	no	2005-11-01	2007-12-01	2005-11-01	8	0
731	A multicenter phase II study of erlotinib and sorafenib in chemotherapy-naive patients with advanced non-small cell lung cancer	J. S. W. Lind, A.-M. C. Dingemans, H. J. M. Groen, F. B. Thunnissen, O. Bekers, D. A. M. Heideman, R. J. Honeywell, E. Giovannetti, G. J. Peters, P. E. Postmus, R. J. van Suylen and E. F. Smit	2010	2010-04-01	Clinical Cancer Research	PURPOSE: This multicenter, phase II study evaluates the efficacy and safety of erlotinib, an epidermal growth factor receptor (EGFR) inhibitor, plus sorafenib, a multityrosine kinase inhibitor against vascular endothelial growth factor receptors, in patients with previously untreated advanced non-small cell lung cancer (NSCLC). EXPERIMENTAL DESIGN: Chemotherapy-naive patients with stage IIIB/IV N…	20395213	NSCLC	PFS-6 weeks			0	1	p2	industry	multi	Netherlands	Europe	positive	acceptable	0	1	0	Erlotinib						50		50	14		14	1	1	1	1		pathologically documented, inoperable, locally advanced, recurrent, or metastatic (stage IIIB or IV) NSCLC	no	no	2007-12-01	2008-10-01	2007-12-01	6	1
732	Randomized phase II trial of sorafenib with temsirolimus or tipifarnib in untreated metastatic melanoma (S0438)	K. A. Margolin, J. Moon, L. E. Flaherty, C. D. Lao, W. L. Akerley, 3rd, M. Othus, J. A. Sosman, J. M. Kirkwood and V. K. Sondak	2012	2012-01-01	Clinical Cancer Research	PURPOSE: Signaling pathway stimulation by activating mutations of oncogenes occurs in most melanomas and can provide excellent targets for therapy, but the short-term therapeutic success is limited by intrinsic and acquired resistance. The mitogen-activated protein kinase and phosphoinositide 3-kinase/AKT/mTOR pathways are activated in most cutaneous melanomas. The purpose of this trial was to pr…	22228638	Melanoma	ORR	PFS-4		0	1	p2	non-industry	multi	United States	N America	negative	acceptable	0	1	0	Temsirolimus	Tipifarnib					102		102	4		4	1					Metastatic melanoma	yes	no	2008-05-01	2009-11-01	2008-05-01	17	2
733	Phase I trial of sorafenib and gemcitabine in advanced solid tumors with an expanded cohort in advanced pancreatic cancer	L. L. Siu, A. Awada, C. H. Takimoto, M. Piccart, B. Schwartz, T. Giannaris, C. Lathia, O. Petrenciuc and M. J. Moore	2006	2006-01-01	Clinical Cancer Research	BACKGROUND: With its potent inhibitory effects against Raf-1 kinase and vascular endothelial growth factor receptor-2, sorafenib is a novel oral anticancer agent targeting signal transduction and angiogenic pathways. This study is designed to combine sorafenib and gemcitabine due to their compatibility in preclinical models and nonoverlapping clinical toxicities. EXPERIMENTAL DESIGN: An initial d…	16397036	Mixed	MTD			0	1	p1	industry	multi	Canada	N America	positive	acceptable	0	1	0	Gemcitabine						42		42	2		2	1					Pancreas, Ovary, Colorectal, Kidney cancer	no	no	2002-05-21	2003-07-23	2002-05-21	17	3
734	Safety, efficacy, pharmacokinetics, and pharmacodynamics of the combination of sorafenib and tanespimycin	U. N. Vaishampayan, A. M. Burger, E. A. Sausville, L. K. Heilbrun, J. Li, M. N. Horiba, M. J. Egorin, P. Ivy, S. Pacey and P. M. Lorusso	2010	2010-06-01	Clinical Cancer Research	PURPOSE: Heat shock protein (Hsp) 90 inhibition affects the Raf kinase signaling pathway and could enhance antitumor effects of sorafenib, a Raf kinase inhibitor. The combination of sorafenib and tanespimycin [17-allyl-amino-geldanamycin (17-AAG); NSC 330507/KOS-953] was evaluated in a phase I trial with the primary objective of defining a phase II dose. Patients and Methods: The dose cohorts con…	20525756	Mixed	RP2D			0	1	p1	non-industry	multi	United States	N America	positive	acceptable	0	1	0	Tanespimycin						23		23	2		2	1					Kidney, Melanoma, Adrenal, Colorectal, Thyroid, Cervix, Pancreas, Tongue	no	no	2005-04-01	2008-03-01	2005-04-01	16	1
735	Results of a phase I trial of sorafenib (BAY 43-9006) in combination with oxaliplatin in patients with refractory solid tumors, including colorectal cancer	P. Kupsch, B. F. Henning, K. Passarge, H. Richly, K. Wiesemann, R. A. Hilger, M. E. Scheulen, O. Christensen, E. Brendel, B. Schwartz, E. Hofstra, R. Voigtmann, S. Seeber and D. Strumberg	2005	2005-09-01	Clinical Colorectal Cancer	BACKGROUND: Sorafenib (BAY 43-9006), a multiple kinase inhibitor, has been shown to inhibit tumor growth and tumor angiogenesis by targeting Raf kinase, vascular endothelial growth factor receptor, and platelet-derived growth factor receptor. In phase I studies, sorafenib demonstrated single-agent activity in patients with advanced solid tumors and was successfully combined with oxaliplatin in pr…	16197622	Mixed	Safety			0	1	p1	ns	not_stated	Germany	Europe	positive	acceptable	0	1	0	Oxaliplatin						32		32	2		2	1					Refractory Colorectal, Uveal melanoma, Renal cancer	no	no	NULL	NULL	2005-09-01	9	0
736	Phase I trial to investigate the safety, pharmacokinetics and efficacy of sorafenib combined with docetaxel in patients with advanced refractory solid tumours	A. Awada, A. Hendlisz, O. Christensen, C. D. Lathia, S. Bartholomeus, F. Lebrun, D. de Valeriola, E. Brendel, M. Radtke, T. Delaunoit, M. Piccart-Gebhart and T. Gil	2012	2012-01-01	European Journal of Cancer	AIM: The safety, pharmacokinetics and efficacy of sorafenib plus docetaxel in patients with advanced refractory cancer were investigated in a phase I, dose-escalation trial. METHODS: Twenty-seven patients in four cohorts received docetaxel on day 1 (cohorts 1 and 4: 75 mg/m2; cohorts 2 and 3: 100 mg/m2) plus sorafenib on days 2-19 (cohorts 1 and 2: 200 mg twice-daily (bid); cohorts 3 and 4: 400 m…	22285181	Mixed	Safety			0	1	p1	industry	single	Belgium	Europe	positive	acceptable	0	1	0	Docetaxel						25		25	3		3	1					Advanced Breast, Prostate, Ovary, Pancreas, Oesophagus, Kidney, Skin cancer	no	no	NULL	NULL	2012-01-01	8	0
738	Results from an in vitro and a clinical/pharmacological phase I study with the combination irinotecan and sorafenib	K. Mross, S. Steinbild, F. Baas, D. Gmehling, M. Radtke, D. Voliotis, E. Brendel, O. Christensen and C. Unger	2007	2006-11-01	European Journal of Cancer	PURPOSE: This single-centre, open-label, phase I dose-escalation study was performed to investigate the safety, pharmacokinetics (PK) and efficacy of sorafenib, a multi-kinase inhibitor, combined with irinotecan, a cytotoxic agent, in patients with advanced, refractory solid tumours. PATIENTS AND METHODS: In an initial dose-escalation phase, patients received irinotecan 125 mg/m(2) and sorafenib …	17095207	Mixed	Safety			0	1	p1	industry	single	Germany	Europe	positive	acceptable	0	1	0	Irinotecan						33		33	1		1	1					refractory or metastatic CRC, OC, PC	no	no	2002-10-28	2004-06-04	2002-10-28	16	0
739	Analysis of the efficacy and toxicity of sorafenib in thyroid cancer: a phase II study in a UK based population	M. Ahmed, Y. Barbachano, A. Riddell, J. Hickey, K. L. Newbold, A. Viros, K. J. Harrington, R. Marais and C. M. Nutting	2011	2011-05-01	European Journal of Endocrinology	AIM: To evaluate the tolerability and efficacy of sorafenib in patients with thyroid carcinoma. METHODS: Patients with progressive locally advanced/metastatic medullary thyroid carcinoma (MTC), or differentiated thyroid carcinoma (DTC) with non-radioiodine-avid disease, were treated with sorafenib 400[HAIR SPACE]mg twice daily until disease progression. The primary endpoint was the radiological r…	21566072	Thyroid	ORR-6			1	0	p2	non-industry	not_stated	United Kingdom	Europe	inconclusive	acceptable	1	0	0							34	34		7	7		1					Progressive locally advanced/metastatic medullary thyroid carcinoma	no	no	2007-02-23	ongoing according to EU registry	2007-02-23	26	0	0
741	Beneficial effects of sorafenib on tumor progression, but not on radioiodine uptake, in patients with differentiated thyroid carcinoma	H. Hoftijzer, K. A. Heemstra, H. Morreau, M. P. Stokkel, E. P. Corssmit, H. Gelderblom, K. Weijers, A. M. Pereira, M. Huijberts, E. Kapiteijn, J. A. Romijn and J. W. Smit	2009	2009-09-01	European Journal of Endocrinology	OBJECTIVE: Treatment options for patients with radioactive iodine (RaI) refractory metastases of differentiated thyroid carcinoma (DTC) are limited. We studied the effects of the multitarget tyrosine kinase inhibitor sorafenib on the reinduction of RaI uptake and tumor progression. DESIGN: Open, single center, single arm 26-week prospective phase II study with open-ended extension. METHODS: We tr…	19773371	Thyroid	Reinduction of RaI uptake at 26 weeks			1	0	p2	industry	single	Netherlands	Europe	negative	acceptable	1	0	0							32	32		8	8		1					Differentiated thyroid carcinoma	no	no	2007-10-01	2008-10-01	2007-10-01	26	0	0
744	Sorafenib as a third line therapy in patients with epithelial ovarian cancer or primary peritoneal cancer: a phase II study	L. Bodnar, M. Gornas and C. Szczylik	2011	2011-07-01	Gynecologic Oncology	PURPOSE: New agents are required for the patients with epithelial ovarian cancer (EOC) who progress after first and second line of the treatment. Tumor vasculature targeted agents are potentially active in EOC. We aimed to assess the activity of sorafenib in patients with recurrent EOC who had received two prior therapies. PATIENTS AND METHODS: A phase II non-randomized, open-label, single-arm st…	21723597	Ovarian/Peritoneal	PFS			1	0	p2	ns	single	Poland	Europe	negative	acceptable	1	0	0							11	11		0	0		1					Epithelial ovarian cancer or primary peritoneal cancer	no	no	2008-12-01	2009-09-01	2008-12-01	8	0	0
745	A phase II study of sorafenib in advanced uterine carcinoma/carcinosarcoma: a trial of the Chicago, PMH, and California Phase II Consortia	H. S. Nimeiri, A. M. Oza, R. J. Morgan, D. Huo, L. Elit, J. A. Knost, J. L. Wade, 3rd, E. Agamah, E. E. Vokes and G. F. Fleming	2010	2010-02-01	Gynecologic Oncology	OBJECTIVES: To determine the efficacy and safety of single agent sorafenib, an oral multi-targeted tyrosine kinase inhibitor, in patients with advanced uterine carcinoma and carcinosarcoma. METHODS: This multi-institutional non-randomized phase II trial enrolled two cohorts: patients with uterine carcinoma (cohort A) and uterine carcinosarcoma (cohort B). Eligibility criteria included measurable …	20117828	Uterine	ORR			1	0	p2	ns	multi	United States	N America	negative	acceptable	1	0	0							56	56		2	2		1					advanced uterine carcinoma/carcinosarcoma	no	no	2005-03-01	2007-08-01	2005-03-01	12	0	0
746	Sorafenib in combination with weekly topotecan in recurrent ovarian cancer, a phase I/II study of the Hoosier Oncology Group	R. Ramasubbaiah, S. M. Perkins, J. Schilder, C. Whalen, C. S. Johnson, M. Callahan, T. Jones, G. Sutton and D. Matei	2011	2011-09-01	Gynecologic Oncology	OBJECTIVE: This trial determined the efficacy and tolerability of sorafenib and weekly topotecan in patients with platinum-resistant ovarian cancer (OC) or primary peritoneal carcinomatosis (PPC). METHODS: Primary endpoints were maximum tolerated dose of sorafenib with weekly topotecan (phase I) and response rate (phase II). Secondary endpoints were progression free survival (PFS), overall surviv…	21955480	Ovarian/Peritoneal	ORR	MTD		0	1	p1-2	industry	multi	United States	N America	negative	unacceptable	0	1	0	Topotecan						30		30	2		2	1					Platinum-resistant ovarian cancer or primary peritoneal carcinomatosis	no	no	2007-10-01	2009-05-01	2007-10-01	10	0
747	Phase I study of sorafenib in patients with refractory or relapsed acute leukemias	G. Borthakur, H. Kantarjian, F. Ravandi, W. Zhang, M. Konopleva, J. J. Wright, S. Faderl, S. Verstovsek, S. Mathews, M. Andreeff and J. E. Cortes	2011	2010-10-01	Haematologica	Background Sorafenib is a multi-kinase inhibitor with activity against fms-like tyrosine kinase 3 with internal tandem duplication mutation and Raf kinase among others. A phase I dose escalation study of sorafenib was conducted in patients with advanced myelodysplastic syndrome and relapsed or refractory acute leukemias. DESIGN AND METHODS: Fifty patients received one of two different schedules; …	20952518	Leukaemia	MTD			1	0	p1	non-industry	not_stated	United States	N America	positive	acceptable	1	0	0							50			0			NON-SOLID					Relapsed or refractory AML, CMML-2, Biphenotypic acute leukemia	no	no	2006-08-01	2009-12-01	2006-08-01	3	0	0
748	Role of cetuximab and sorafenib in treatment of metastatic colorectal cancer	K. M. Galal, Z. Khaled and A. M. M. Mourad	2011	2011-01-01	Indian Journal of Cancer	BACKGROUND: The relationship of epidermal growth factor receptors (EGFR) pathway, such as PI3K, K-ras, and B-raf, with response to EGFR-targeted antibodies is less well studied. AIM: To assess sorafenib with cetuximab in treating metastatic colorectal cancer. SETTINGS AND DESIGN: Thirty-five patients with metastatic colorectal cancer were randomized to receive cetuximab with or without oral soraf…	21248446	Colorectal	ORR			0	1	p2	industry	single	Egypt	Africa	positive	acceptable	0	1	1	Cetuximab		Cetuximab				18		18	6		6	1	1		1		Metastatic CRC	yes	no	2007-10-01	2009-06-01	2007-10-01	12	0
752	Sorafenib in combination with gemcitabine in recurrent epithelial ovarian cancer: a study of the Princess Margaret Hospital Phase II Consortium	S. A. Welch, H. W. Hirte, L. Elit, R. J. Schilder, L. Wang, K. Macalpine, J. J. Wright and A. M. Oza	2010	2010-07-01	International Journal of Gynecological Cancer	OBJECTIVES: Antiangiogenic strategies have demonstrated efficacy in epithelial ovarian cancer (EOC). Sorafenib is a novel multitargeted kinase inhibitor with antiangiogenic activity. Gemcitabine has known activity against EOC. A phase 1 clinical trial of this combination suggested activity in ovarian cancer with no dose-limiting toxicity. This phase 2 study was designed to examine the safety and …	20847613	Ovarian/Peritoneal	ORR			0	1	p2	ns	multi	Canada	N America	negative	acceptable	0	1	0	Gemcitabine						43		43	2		2	1					Recurrent Epithelial Ovarian Cancer	no	no	2004-09-01	2006-07-01	2004-09-01	16	0
753	A randomized phase II of gemcitabine and sorafenib versus sorafenib alone in patients with metastatic pancreatic cancer	A. B. El-Khoueiry, R. K. Ramanathan, D. Y. Yang, W. Zhang, S. Shibata, J. J. Wright, D. Gandara and H. J. Lenz	2012	2011-03-01	Investigational New Drugs	Purpose Patients with metastatic pancreatic cancer have limited therapeutic options. The role of the Ras-Raf-MAPK pathway and of vascular endothelial growth factor in pancreatic carcinogenesis provided the rational to evaluate the efficacy of sorafenib with or without gemcitabine in a randomized phase II study. Methods Patients with metastatic pancreatic cancer were randomized to sorafenib alone …	21424698	Pancreatic	ORR			1	1	p2	non-industry	multi	United States	N America	negative	na	1	1	0	Gemcitabine					1	52	13	37	1	0	1	1	1	1			Metastatic pancreatic cancer	yes	no	2004-12-01	2007-03-01	2004-12-01	8	0	0
754	Phase I dose-finding study of sorafenib in combination with capecitabine and cisplatin as a first-line treatment in patients with advanced gastric cancer	C. Kim, J.-L. Lee, Y. H. Choi, B. W. Kang, M.-H. Ryu, H. M. Chang, T. W. Kim and Y.-K. Kang	2012	2010-09-01	Investigational New Drugs	BACKGROUND: To define maximum-tolerated dose (MTD), dose-limiting toxicities (DLTs), and preliminary efficacy of sorafenib plus capecitabine/cisplatin in advanced gastric cancer (AGC) patients. METHODS: Four dose-level combinations were tested in a standard 3 + 3 dose escalation design. Level 1: sorafenib 400 mg/d, capecitabine 1,600 mg/m(2)/d, cisplatin 80 mg/m(2). Level 2: sorafenib 800 mg/d, c…	20839031	Gastric	MTD			0	1	p1	ns	single	Korea South	Asia	positive	acceptable	0	1	0	Capecitabine + Cisplatin						16		16	10		10	1					Advanced gastric cancer	no	no	2007-10-01	2008-07-01	2007-10-01	24	1
755	Gemcitabine plus sorafenib in patients with advanced pancreatic cancer: a phase II trial of the University of Chicago Phase II Consortium	H. L. Kindler, K. Wroblewski, J. A. Wallace, M. J. Hall, G. Locker, S. Nattam, E. Agamah, W. M. Stadler and E. E. Vokes	2012	2010-08-01	Investigational New Drugs	BACKGROUND: Sorafenib, an inhibitor of B-raf, VEGFR2, and PDGFR-beta, has activity against pancreatic cancer in preclinical models. In a phase I trial of gemcitabine plus sorafenib, 57% of pancreatic cancer patients achieved stable disease. PATIENTS AND METHODS: We conducted a multi-center phase II trial of sorafenib plus gemcitabine in chemo-naive patients with histologically-confirmed, advanced…	20803052	Pancreatic	ORR			0	1	p2	non-industry	multi	United States	N America	negative	unacceptable	0	1	0	Gemcitabine						17		17	0		0	1					Advanced pancreatic cancer	no	no	2004-09-01	2005-12-01	2004-09-01	8	0
756	Phase I clinical and pharmacokinetic study of sorafenib in combination with carboplatin and paclitaxel in patients with advanced non-small cell lung cancer	I. Okamoto, M. Miyazaki, R. Morinaga, H. Kaneda, S. Ueda, Y. Hasegawa, T. Satoh, A. Kawada, M. Fukuoka, K. Fukino, T. Tanigawa and K. Nakagawa	2010	2009-09-01	Investigational New Drugs	OBJECTIVES: Unsatisfactory efficacy of current treatments for advanced lung cancer has prompted the search for new therapies, with sorafenib, a multikinase inhibitor, being one candidate drug. This phase I trial was conducted to evaluate drug safety and pharmacokinetics as well as tumor response of sorafenib in combination with paclitaxel and carboplatin in patients with advanced non-small cell l…	19760364	NSCLC	PK profile	Safety		0	1	p1	industry	single	Japan	Asia	positive	acceptable	0	1	0	Carboplatin + Paclitaxel						12		12	7		7	1					Advanced NSCLC	no	no	NULL	NULL	2009-09-01	3	0
758	A phase II trial of sorafenib in first-line metastatic urothelial cancer: a study of the PMH Phase II Consortium	S. S. Sridhar, E. Winquist, A. Eisen, S. J. Hotte, E. McWhirter, I. F. Tannock, S. D. Mukherjee, L. Wang, C. Blattler, J. J. Wright and M. J. Moore	2011	2010-02-01	Investigational New Drugs	BACKGROUND: Sorafenib is an oral multikinase inhibitor that blocks cell proliferation via the ERK pathway and angiogenesis via the VEGF pathway. This phase II trial was conducted to determine the efficacy and tolerability of sorafenib for the treatment of patients with metastatic urothelial cancer (UC) who had not had prior chemotherapy for advanced disease. PaTIENTS AND METHODS: Seventeen chemo-…	20191303	Urothelial	ORR			1	0	p2	ns	multi	Canada	N America	negative	acceptable	1	0	0							14	14		0	0		1					Metastatic urothelial cancer	no	no	2005-08-01	2006-11-01	2005-08-01	8	0	0
759	Doxorubicin plus sorafenib vs doxorubicin alone in patients with advanced hepatocellular carcinoma: a randomized trial	G. K. Abou-Alfa, P. Johnson, J. J. Knox, M. Capanu, I. Davidenko, J. Lacava, T. Leung, B. Gansukh and L. B. Saltz	2010	2010-11-01	JAMA	CONTEXT: In a randomized phase 3 trial, 400 mg of sorafenib twice daily prolonged overall survival of patients with advanced hepatocellular carcinoma (HCC) and Child-Pugh A disease. In a phase 1 study, sorafenib combined with doxorubicin, 60 mg/m(2), was well tolerated by patients with refractory solid tumors. The combination of sorafenib and doxorubicin in patients with advanced HCC has not been…	21081728	HCC	TTP			0	1	p2	industry	multi	United States	N America	positive	acceptable	0	1	1	Doxorubicin		Doxorubicin + Placebo				47		47	2		2	1					Advanced HCC	yes	yes	2005-04-01	2006-10-01	2005-04-01	17	3
760	Phase II study to investigate the efficacy, safety, and pharmacokinetics of sorafenib in Japanese patients with advanced renal cell carcinoma	H. Akaza, T. Tsukamoto, M. Murai, K. Nakajima and S. Naito	2007	2007-10-01	Japanese Journal of Clinical Oncology	OBJECTIVE: Sorafenib (Nexavar) is an oral multi-kinase inhibitor that targets tumor growth and angiogenesis. This phase II study investigated efficacy, safety, and pharmacokinetics of sorafenib in Japanese patients with advanced renal cell carcinoma (RCC). METHODS: Nonrandomized, open-label study in Japanese patients with metastatic renal cell carcinoma who had received nephrectomy and failed >/=…	17951335	RCC	ORR			1	0	p2	industry	multi	Japan	Asia	positive	acceptable	1	0	0							129	129		16	16		1					Advanced RCC	no	no	2004-11-01	2006-03-01	2004-11-01	28	1	1
763	Safety and efficacy of sorafenib in patients with advanced hepatocellular carcinoma in consideration of concomitant stage of liver cirrhosis	M. A. Worns, A. Weinmann, K. Pfingst, C. Schulte-Sasse, C.-M. Messow, H. Schulze-Bergkamen, A. Teufel, M. Schuchmann, S. Kanzler, C. Duber, G. Otto and P. R. Galle	2009	2009-05-01	Journal of Clinical Gastroenterology	GOALS AND BACKGROUND: The multikinase inhibitor sorafenib provides survival benefit for patients with advanced hepatocellular carcinoma (HCC) and liver cirrhosis (LCI) Child-Pugh A. We report our experiences with sorafenib in advanced HCC, particularly in patients with LCI Child-Pugh B/C, where only limited data are available in regard to safety and efficacy of sorafenib. METHODS: Thirty-four pat…	19247201	HCC	ORR			1	0	p2	ns	single	Germany	Europe	negative	unacceptable	1	0	0							34	34		1	1		1	1	1			Advanced HCC and LCI Child-Pugh B/C	no	no	2007-01-01	2008-03-01	2007-01-01	9.5	0	0
764	Phase II study of sorafenib in patients with advanced hepatocellular carcinoma	G. K. Abou-Alfa, L. Schwartz, S. Ricci, D. Amadori, A. Santoro, A. Figer, J. De Greve, J.-Y. Douillard, C. Lathia, B. Schwartz, I. Taylor, M. Moscovici and L. B. Saltz	2006	2006-08-01	Journal of Clinical Oncology	PURPOSE: This phase II study of sorafenib, an oral multikinase inhibitor that targets Raf kinase and receptor tyrosine kinases, assessed efficacy, toxicity, pharmacokinetics, and biomarkers in advanced hepatocellular carcinoma (HCC) patients. METHODS: Patients with inoperable HCC, no prior systemic treatment, and Child-Pugh (CP) A or B, received continuous, oral sorafenib 400 mg bid in 4-week cyc…	16908937	HCC	ORR			1	0	p2	industry	multi	United States	N America	negative	acceptable	1	0	0							137	137		3	3		1					Advanced HCC	no	no	2002-08-01	2003-06-01	2002-08-01	15	1	1
766	Combination targeted therapy with sorafenib and bevacizumab results in enhanced toxicity and antitumor activity.[Erratum appears in J Clin Oncol. 2008 Sep 10;26(26):4363 Note: Figg, William D [added]]	N. S. Azad, E. M. Posadas, V. E. Kwitkowski, S. M. Steinberg, L. Jain, C. M. Annunziata, L. Minasian, G. Sarosy, H. L. Kotz, A. Premkumar, L. Cao, D. McNally, C. Chow, H. X. Chen, J. J. Wright, W. D. Figg and E. C. Kohn	2008	2008-08-01	Journal of Clinical Oncology	PURPOSE: Sorafenib inhibits Raf kinase and vascular endothelial growth factor (VEGF) receptor. Bevacizumab is a monoclonal antibody targeted against VEGF. We hypothesized that the complementary inhibition of VEGF signaling would have synergistic therapeutic effects. PATIENTS AND METHODS: Patients had advanced solid tumors, Eastern Cooperative Oncology Group performance status of 0 to 1, and good …	18669456	Mixed	MTD			0	1	p1	non-industry	not_stated	United States	N America	inconclusive	unacceptable	0	1	0	Bevacizumab						37		37	7		7	1					Melanoma, RCC, sarcoma, colon cancer, mesothelioma, follicular thyroid cancer, carcinoma of unknown primary, adenoid cystic breast cancer, cervical cancer, adrenal cancer, fallopian tube cancer	no	no	2004-11-01	2007-09-01	2004-11-01	8	0
767	Sorafenib in Combination With Capecitabine: An Oral Regimen for Patients With HER2-Negative Locally Advanced or Metastatic Breast Cancer	J. Baselga, J. G. M. Segalla, H. Roche, A. Del Giglio, H. Pinczowski, E. M. Ciruelos, S. C. Filho, P. Gomez, B. Van Eyll, B. Bermejo, A. Llombart, B. Garicochea, M. A. C. Duran, P. M. G. Hoff, M. Espie, A. A. J. G. de Moraes, R. A. Ribeiro, C. Mathias, M. Gil Gil, B. Ojeda, J. Morales, S. Kwon Ro, S. Li and F. Costa	2012	2012-03-01	Journal of Clinical Oncology	PURPOSE Sorafenib is a multikinase inhibitor with antiangiogenic/antiproliferative activity. A randomized, double-blind, placebo-controlled phase IIB trial assessed sorafenib with capecitabine for locally advanced or metastatic human epidermal growth factor receptor 2 (HER2) -negative breast cancer. PATIENTS AND METHODS Patients were randomly assigned to first- or second-line capecitabine 1,000 m…	22412143	Breast	PFS			0	1	p2	non-industry	multi	United States	N America	positive	unacceptable	0	1	1	Capecitabine		Capecitabine + Placebo				115		115	44		44	1					HER2-Negative Locally Advanced or Metastatic Breast Cancer	yes	yes	2007-08-01	2008-12-01	2007-08-01	28	0
768	Phase II, multicenter, uncontrolled trial of single-agent sorafenib in patients with relapsed or refractory, advanced non-small-cell lung cancer	G. R. Blumenschein, Jr., U. Gatzemeier, F. Fossella, D. J. Stewart, L. Cupit, F. Cihon, J. O'Leary and M. Reck	2009	2009-08-01	Journal of Clinical Oncology	PURPOSE: Sorafenib is an oral multikinase inhibitor that targets the Ras/Raf/MEK/ERK mitogenic signaling pathway and the angiogenic receptor tyrosine kinases, vascular endothelial growth factor receptor 2 and platelet-derived growth factor receptor beta. We evaluated the antitumor response and tolerability of sorafenib in patients with relapsed or refractory, advanced non-small-cell lung cancer (…	19652055	NSCLC	ORR			1	0	p2	industry	multi	United States	N America	negative	acceptable	1	0	0							51	51		0	0		1					Relapsed or refractory advanced NSCLC	no	no	2004-04-01	2005-01-01	2004-04-01	10	0	0
772	Phase II trial of sorafenib in patients with recurrent or metastatic squamous cell carcinoma of the head and neck or nasopharyngeal carcinoma	C. Elser, L. L. Siu, E. Winquist, M. Agulnik, G. R. Pond, S. F. Chin, P. Francis, R. Cheiken, J. Elting, A. McNabola, D. Wilkie, O. Petrenciuc and E. X. Chen	2007	2007-08-01	Journal of Clinical Oncology	PURPOSE: To determine the efficacy and safety of single-agent sorafenib in patients with recurrent and/or metastatic squamous cell carcinoma of the head and neck (SCCHN) and nasopharyngeal carcinoma (NPC). PATIENTS AND METHODS: In this single-arm phase II trial, oral continuous sorafenib was administered in 28-day cycles. Patients had <or= one line of chemotherapy for recurrent and/or metastatic …	17704426	HNC	ORR			1	0	p2	industry	multi	Canada	N America	negative	acceptable	1	0	0							27	27		1	1		1					Recurrent and/or metastatic SCCHN and NPC	no	no	2004-01-01	2006-01-01	2004-01-01	8	0	0
773	Randomized phase II trial of first-line treatment with sorafenib versus interferon Alfa-2a in patients with metastatic renal cell carcinoma.[Erratum appears in J Clin Oncol. 2009 May 1; 27(13):2305]	B. Escudier, C. Szczylik, T. E. Hutson, T. Demkow, M. Staehler, F. Rolland, S. Negrier, N. Laferriere, U. J. Scheuring, D. Cella, S. Shah and R. M. Bukowski	2009	2009-01-01	Journal of Clinical Oncology	PURPOSE: An open-label, phase II study to evaluate progression-free survival (PFS), overall best response, adverse events (AEs), and patient-reported outcomes with sorafenib versus interferon alfa-2a (IFN-alpha-2a) in patients with untreated, advanced renal cancer. PATIENTS AND METHODS: A total of 189 patients were randomly assigned to oral sorafenib 400 mg twice daily or to subcutaneous IFN-alph…	19171708	RCC	PFS			1	0	p2	ns	multi	France	Europe	negative	acceptable	1	0	1			IFN-a2a				97	97		14	14		1					Metastatic RCC	yes	no	2005-06-01	2005-09-01	2005-06-01	25	0	0
774	Phase II trial of sorafenib plus interferon alfa-2b as first- or second-line therapy in patients with metastatic renal cell cancer	J. A. Gollob, W. K. Rathmell, T. M. Richmond, C. B. Marino, E. K. Miller, G. Grigson, C. Watkins, L. Gu, B. L. Peterson and J. J. Wright	2007	2007-08-01	Journal of Clinical Oncology	PURPOSE: We undertook this study to determine the activity and tolerability of sorafenib administered with interferon alfa-2b (IFN-alpha-2b) as first- or second-line therapy in metastatic renal cell cancer (RCC). PATIENTS AND METHODS: Between November 2004 and October 2006, 40 patients at two sites were enrolled onto a phase II trial of sorafenib plus IFN-alpha-2b. Treatment consisted of 8-week c…	17664476	RCC	ORR	Safety		0	1	p2	non-industry	multi	United States	N America	positive	acceptable	0	1	0	IFN-a2b						40		40	13		13	1					Metastatic RCC	no	no	2004-11-01	2006-10-01	2004-11-01	24	0
775	Phase II trial of sorafenib in advanced thyroid cancer	V. Gupta-Abramson, A. B. Troxel, A. Nellore, K. Puttaswamy, M. Redlinger, K. Ransone, S. J. Mandel, K. T. Flaherty, L. A. Loevner, P. J. O'Dwyer and M. S. Brose	2008	2008-06-01	Journal of Clinical Oncology	PURPOSE: Given the molecular pathophysiology of thyroid cancer and the spectrum of kinases inhibited by sorafenib, including Raf kinase, vascular endothelial growth factor receptors, platelet-derived growth factor receptor, and RET tyrosine kinases, we conducted an open-label phase II trial to determine the efficacy of sorafenib in patients with advanced thyroid carcinoma. PATIENTS AND METHODS: E…	18541894	Thyroid	ORR	SD		1	0	p2	non-industry	single	United States	N America	positive	acceptable	1	0	0							30	30		7	7		1					iodine-refractory metastatic TC	no	no	2006-02-01	2007-09-01	2006-02-01	27	1	1
776	Results of a phase III, randomized, placebo-controlled study of sorafenib in combination with carboplatin and paclitaxel as second-line treatment in patients with unresectable stage III or stage IV melanoma	A. Hauschild, S. S. Agarwala, U. Trefzer, D. Hogg, C. Robert, P. Hersey, A. Eggermont, S. Grabbe, R. Gonzalez, J. Gille, C. Peschel, D. Schadendorf, C. Garbe, S. O'Day, A. Daud, J. M. White, C. Xia, K. Patel, J. M. Kirkwood and U. Keilholz	2009	2009-04-01	Journal of Clinical Oncology	PURPOSE: This phase III, randomized, double-blind, placebo-controlled study was conducted to evaluate the efficacy and safety of sorafenib with carboplatin and paclitaxel (CP) in patients with advanced melanoma who had progressed on a dacarbazine- or temozolomide-containing regimen. PATIENTS AND METHODS: A total of 270 patients were randomly assigned to receive intravenous paclitaxel 225 mg/m2 pl…	19349552	Melanoma	PFS			0	1	p3	industry	multi	United States	N America	negative	acceptable	0	1	1	Carboplatin + Paclitaxel		Carboplatin + Paclitaxel + Placebo				134		134	16		16	1					Unresectable Stage III or Stage IV Melanoma	yes	yes	2005-05-01	2006-05-01	2005-05-01	17	4
777	Phase I pharmacokinetic and pharmacodynamic study of the multikinase inhibitor sorafenib in combination with clofarabine and cytarabine in pediatric relapsed/refractory leukemia	H. Inaba, J. E. Rubnitz, E. Coustan-Smith, L. Li, B. D. Furmanski, G. P. Mascara, K. M. Heym, R. Christensen, M. Onciu, S. A. Shurtleff, S. B. Pounds, C.-H. Pui, R. C. Ribeiro, D. Campana and S. D. Baker	2011	2011-07-01	Journal of Clinical Oncology	PURPOSE: To assess the toxicity, pharmacokinetics, and pharmacodynamics of multikinase inhibitor sorafenib in combination with clofarabine and cytarabine in children with relapsed/refractory leukemia. PATIENTS AND METHODS: Twelve patients with acute leukemia (11 with acute myeloid leukemia [AML]) received sorafenib on days 1 to 7 and then concurrently with cytarabine (1 g/m(2)) and clofarabine (s…	21768474	Leukaemia	MTD	Preliminary efficacy		0	1	p1	non-industry	not_stated	United States	N America	positive	acceptable	0	1	0	Clofarabine + Cytarabine						12			0			NON-SOLID					Pediatric relapsed/refractory leukemia	no	no	2009-09-01	2010-10-01	2009-09-01	4	0
778	Phase II trial of sorafenib in metastatic thyroid cancer	R. T. Kloos, M. D. Ringel, M. V. Knopp, N. C. Hall, M. King, R. Stevens, J. Liang, P. E. Wakely, Jr., V. V. Vasko, M. Saji, J. Rittenberry, L. Wei, D. Arbogast, M. Collamore, J. J. Wright, M. Grever and M. H. Shah	2009	2009-03-01	Journal of Clinical Oncology	PURPOSE: Based on the pivotal role of Ras-Raf-MAP-ERK signaling and vascular endothelial growth factor (VEGF) in papillary thyroid cancer (PTC), we conducted a phase II clinical trial of sorafenib targeting RAF and VEGF receptor kinases in PTC. PATIENTS AND METHODS: The primary end point was the objective response rate. Secondary end points included response correlation with serum thyroglobulin (…	19255327	Thyroid	ORR			1	0	p2	non-industry	not_stated	United States	N America	inconclusive	acceptable	1	0	0							56	56		6	6		1					Metastatic thyroid cancer (PTC, ATC, FTC, HTC)	no	no	2004-10-01	2005-08-01	2004-10-01	45	1	1
779	Phase II clinical trial of sorafenib in metastatic medullary thyroid cancer	E. T. Lam, M. D. Ringel, R. T. Kloos, T. W. Prior, M. V. Knopp, J. Liang, S. Sammet, N. C. Hall, P. E. Wakely, Jr., V. V. Vasko, M. Saji, P. J. Snyder, L. Wei, D. Arbogast, M. Collamore, J. J. Wright, J. F. Moley, M. A. Villalona-Calero and M. H. Shah	2010	2010-04-01	Journal of Clinical Oncology	PURPOSE: Mutations in the RET proto-oncogene and vascular endothelial growth factor receptor (VEGFR) activity are critical in the pathogenesis of medullary thyroid cancer (MTC). Sorafenib, a multikinase inhibitor targeting Ret and VEGFR, showed antitumor activity in preclinical studies of MTC. PATIENTS AND METHODS: In this phase II trial of sorafenib in patients with advanced MTC, the primary end…	20368568	Thyroid	ORR			1	0	p2	non-industry	multi	United States	N America	negative	acceptable	1	0	0							21	21		2	2		1	1			1	Metastatic MTC	no	no	2006-11-01	2008-01-01	2006-11-01	65	1	1
780	Phase II study of sorafenib in patients with metastatic or recurrent sarcomas	R. G. Maki, D. R. D'Adamo, M. L. Keohan, M. Saulle, S. M. Schuetze, S. D. Undevia, M. B. Livingston, M. M. Cooney, M. L. Hensley, M. M. Mita, C. H. Takimoto, A. S. Kraft, A. D. Elias, B. Brockstein, N. E. Blachere, M. A. Edgar, L. H. Schwartz, L.-X. Qin, C. R. Antonescu and G. K. Schwartz	2009	2009-05-01	Journal of Clinical Oncology	PURPOSE Since activity of sorafenib was observed in sarcoma patients in a phase I study, we performed a multicenter phase II study of daily oral sorafenib in patients with recurrent or metastatic sarcoma. PATIENTS AND METHODS We employed a multiarm study design, each representing a sarcoma subtype with its own Simon optimal two-stage design. In each arm, 12 patients who received 0 to 1 prior line…	19451436	Sarcoma	ORR			1	0	p2	non-industry	multi	United States	N America	negative	na	1	0	0							122	122		6	6		1					Metastatic or recurrent sarcomas	no	no	2005-10-01	2007-11-01	2005-10-01	12	2	2
781	Activity of sorafenib in recurrent ovarian cancer and primary peritoneal carcinomatosis: a gynecologic oncology group trial	D. Matei, M. W. Sill, H. A. Lankes, K. DeGeest, R. E. Bristow, D. Mutch, S. D. Yamada, D. Cohn, V. Calvert, J. Farley, E. F. Petricoin and M. J. Birrer	2011	2010-11-01	Journal of Clinical Oncology	PURPOSE Sorafenib is a kinase inhibitor targeting Raf and other kinases (ie, vascular endothelial growth factor receptor [VEGFR], platelet-derived growth factor receptor [PDGFR], Flt3, and c-KIT). This study assessed its activity and tolerability in patients with recurrent ovarian cancer (OC) or primary peritoneal carcinomatosis (PPC). METHODS This open-label, multi-institutional, phase II study …	21098323	Ovarian/Peritoneal	PFS-6			1	0	p2	non-industry	multi	United States	N America	inconclusive	unacceptable	1	0	0							59	59		2	2		1					Recurrent OC or PPC	no	no	2004-10-01	2007-09-01	2004-10-01	8	0	0
782	Double-blind randomized phase II study of the combination of sorafenib and dacarbazine in patients with advanced melanoma: a report from the 11715 Study Group	D. F. McDermott, J. A. Sosman, R. Gonzalez, F. S. Hodi, G. P. Linette, J. Richards, J. W. Jakub, M. Beeram, S. Tarantolo, S. Agarwala, G. Frenette, I. Puzanov, L. Cranmer, K. Lewis, J. Kirkwood, J. M. White, C. Xia, K. Patel and E. Hersh	2008	2008-05-01	Journal of Clinical Oncology	PURPOSE: This phase II study evaluated the efficacy and safety of sorafenib plus dacarbazine in patients with advanced melanoma. PATIENTS AND METHODS: This randomized, double-blind, placebo-controlled, multicenter study enrolled chemotherapy-naive patients with stage III (unresectable) or IV melanoma. A total of 101 patients received placebo plus dacarbazine (n = 50) or sorafenib plus dacarbazine…	18445842	Melanoma	PFS			0	1	p2	industry	multi	United States	N America	negative	acceptable	0	1	1	Dacarbazine		Dacarbazine + Placebo				51		51	12		12	1	1	1			Advanced melanoma	yes	yes	2005-04-01	2006-10-01	2005-04-01	15.6	0
783	Phase I and pharmacokinetic study of sorafenib in patients with hepatic or renal dysfunction: CALGB 60301	A. A. Miller, D. J. Murry, K. Owzar, D. R. Hollis, E. B. Kennedy, G. Abou-Alfa, A. Desai, J. Hwang, M. A. Villalona-Calero, E. C. Dees, L. D. Lewis, M. G. Fakih, M. J. Edelman, F. Millard, R. C. Frank, R. J. Hohl and M. J. Ratain	2009	2009-03-01	Journal of Clinical Oncology	PURPOSE: We sought to characterize the pharmacokinetics (PK) and determine a tolerable dose of oral sorafenib in patients with hepatic or renal dysfunction. PATIENTS AND METHODS: Patients were assigned to one of nine cohorts: cohort 1, bilirubin < or = upper limit of normal (ULN) and AST < or = ULN and creatinine clearance (CC) > or = 60 mL/min; cohort 2, bilirubin more than ULN but < or = 1.5x U…	19255312	Mixed	MTD	PK profile		1	0	p1	non-industry	multi	United States	N America	positive	acceptable	1	0	0							138	138		4	4		1					Solid tumors, multiple myeloma, or non-Hodgkin’s lymphoma	no	no	2005-01-01	2007-02-01	2005-01-01	4	1	1
784	Phase II trial of sorafenib in patients with metastatic breast cancer previously exposed to anthracyclines or taxanes: North Central Cancer Treatment Group and Mayo Clinic Trial N0336	A. Moreno-Aspitia, R. F. Morton, D. W. Hillman, W. L. Lingle, K. M. Rowland, Jr., M. Wiesenfeld, P. J. Flynn, T. R. Fitch and E. A. Perez	2009	2008-12-01	Journal of Clinical Oncology	PURPOSE: We conducted a cooperative group phase II study to assess antitumor activity and toxicity of sorafenib in patients with metastatic breast cancer (MBC) who had received prior treatment for their disease. PATIENT AND METHODS: Patients were eligible if they had measurable disease and had previously received an anthracycline and/or a taxane in the neoadjuvant, adjuvant, or metastatic setting…	19047293	Breast	ORR			1	0	p2	non-industry	multi	United States	N America	negative	acceptable	1	0	0							20	20		0	0		1					MBC Previously Exposed to Anthracyclines or Taxanes	no	no	2004-11-01	2005-06-01	2004-11-01	8	0	0
785	Phase II trial of sorafenib combined with concurrent transarterial chemoembolization with drug-eluting beads for hepatocellular carcinoma	T. M. Pawlik, D. K. Reyes, D. Cosgrove, I. R. Kamel, N. Bhagat and J.-F. H. Geschwind	2011	2011-09-01	Journal of Clinical Oncology	PURPOSE To evaluate safety and efficacy of combined transarterial chemoembolization (TACE) with doxorubicin-eluting beads (DEB) and sorafenib in patients with advanced hepatocellular carcinoma (HCC). PATIENTS AND METHODS A prospective single-center phase II study was undertaken involving patients with unresectable HCC. The protocol involved sorafenib 400 mg twice per day combined with DEB-TACE. S…	21911714	HCC	Safety			0	1	p2	industry	single	United States	N America	positive	acceptable	0	1	0	Doxorubicin-TACE						56	56	56	5	0	5	1	1	1			Unresectable HCC	no	no	2009-03-01	2011-01-01	2009-03-01	10	0
787	Phase II placebo-controlled randomized discontinuation trial of sorafenib in patients with metastatic renal cell carcinoma	M. J. Ratain, T. Eisen, W. M. Stadler, K. T. Flaherty, S. B. Kaye, G. L. Rosner, M. Gore, A. A. Desai, A. Patnaik, H. Q. Xiong, E. Rowinsky, J. L. Abbruzzese, C. Xia, R. Simantov, B. Schwartz and P. J. O'Dwyer	2006	2006-06-01	Journal of Clinical Oncology	PURPOSE: This phase II randomized discontinuation trial evaluated the effects of sorafenib (BAY 43-9006), an oral multikinase inhibitor targeting the tumor and vasculature, on tumor growth in patients with metastatic renal cell carcinoma. PATIENTS AND METHODS: Patients initially received oral sorafenib 400 mg twice daily during the initial run-in period. After 12 weeks, patients with changes in b…	16636341	RCC	PFS-24 weeks			1	0	p2	industry	multi	United States	N America	positive	acceptable	1	0	1			Placebo				202	202		8	8		1					Metastatic RCC	yes	no	2002-09-01	2004-12-01	2002-09-01	24	0	0
788	Phase I/II study of combination therapy with sorafenib, idarubicin, and cytarabine in younger patients with acute myeloid leukemia	F. Ravandi, J. E. Cortes, D. Jones, S. Faderl, G. Garcia-Manero, M. Y. Konopleva, S. O'Brien, Z. Estrov, G. Borthakur, D. Thomas, S. R. Pierce, M. Brandt, A. Byrd, B. N. Bekele, K. Pratz, R. Luthra, M. Levis, M. Andreeff and H. M. Kantarjian	2010	2010-03-01	Journal of Clinical Oncology	PURPOSE To determine the efficacy and toxicity of the combination of sorafenib, cytarabine, and idarubicin in patients with acute myeloid leukemia (AML) younger than age 65 years. PATIENTS AND METHODS In the phase I part of the study, 10 patients with relapsed AML were treated with escalating doses of sorafenib with chemotherapy to establish the feasibility of the combination. We then treated 51 …	20212254	Leukaemia	Safety			0	1	p1-2	non-industry	not_stated	United States	N America	positive	acceptable	0	1	0	Cytarabine + Idarubicin						61			0			NON-SOLID					AML	no	no	2007-10-01	2009-02-01	2007-10-01	54	0
789	Sorafenib with interferon alfa-2b as first-line treatment of advanced renal carcinoma: a phase II study of the Southwest Oncology Group	C. W. Ryan, B. H. Goldman, P. N. Lara, Jr., P. C. Mack, T. M. Beer, C. M. Tangen, D. Lemmon, C.-X. Pan, H. A. Drabkin, E. D. Crawford and G. Southwest Oncology	2007	2007-08-01	Journal of Clinical Oncology	PURPOSE: This phase II study evaluated the activity of combined treatment with interferon alfa-2b and sorafenib, a Raf and multiple receptor tyrosine kinase inhibitor, in patients with advanced renal carcinoma. PATIENTS AND METHODS: Eligible patients had metastatic or unresectable renal carcinoma with a clear-cell component, no prior systemic therapy, performance status 0 to 1, and measurable dis…	17664477	RCC	ORR			0	1	p2	non-industry	multi	United States	N America	inconclusive	unacceptable	0	1	0	IFN-a2b						62		62	12		12	1					Metastatic or unresectable RCC	no	no	2004-09-01	2005-05-01	2004-09-01	22	1
790	Phase III study of carboplatin and paclitaxel alone or with sorafenib in advanced non-small-cell lung cancer	G. Scagliotti, S. Novello, J. von Pawel, M. Reck, J. R. Pereira, M. Thomas, J. E. Abrao Miziara, B. Balint, F. De Marinis, A. Keller, O. Aren, M. Csollak, I. Albert, C. H. Barrios, F. Grossi, M. Krzakowski, L. Cupit, F. Cihon, S. Dimatteo and N. Hanna	2010	2010-03-01	Journal of Clinical Oncology	PURPOSE This phase III, multicenter, randomized, placebo-controlled trial assessed the efficacy and safety of sorafenib, an oral multikinase inhibitor, in combination with carboplatin and paclitaxel in chemotherapy-naive patients with unresectable stage IIIB or IV non-small-cell lung cancer (NSCLC). PATIENTS AND METHODS Nine hundred twenty-six patients were randomly assigned to receive up to six …	20212250	NSCLC	OS			0	1	p3	industry	multi	Italy	Europe	negative	acceptable	0	1	1	Carboplatin + Paclitaxel		Carboplatin + Paclitaxel + Placebo				464		464	127		127	1					Advanced (unresectable stage IIIB (wet) or stage IV) NSCLC	yes	no	2006-02-01	2007-05-01	2006-02-01	17	14
791	Randomized, double-blind, placebo-controlled, phase II trial of sorafenib and erlotinib or erlotinib alone in previously treated advanced non-small-cell lung cancer	D. R. Spigel, H. A. Burris, 3rd, F. A. Greco, D. L. Shipley, E. K. Friedman, D. M. Waterhouse, R. C. Whorf, R. B. Mitchell, D. B. Daniel, J. Zangmeister, J. D. Bass and J. D. Hainsworth	2011	2011-05-01	Journal of Clinical Oncology	PURPOSE: Sorafenib, an oral multikinase inhibitor, has shown preliminary activity in non-small-cell lung cancer (NSCLC). Patients with advanced NSCLC were treated with erlotinib with or without sorafenib in this multicenter phase II trial. PATIENTS AND METHODS: Key eligibility criteria included the following: stage IIIB or IV NSCLC; one to two prior regimens; Eastern Cooperative Oncology Group pe…	21576636	NSCLC	ORR	PFS		0	1	p2	industry	multi	United States	N America	negative	acceptable	0	1	1	Erlotinib		Erlotinib + Placebo				111		111	9		9	1					Advanced NSCLC	yes	yes	2008-02-01	2009-02-01	2008-02-01	8	0
792	Phase I clinical and pharmacokinetic study of the Novel Raf kinase and vascular endothelial growth factor receptor inhibitor BAY 43-9006 in patients with advanced refractory solid tumors	D. Strumberg, H. Richly, R. A. Hilger, N. Schleucher, S. Korfee, M. Tewes, M. Faghih, E. Brendel, D. Voliotis, C. G. Haase, B. Schwartz, A. Awada, R. Voigtmann, M. E. Scheulen and S. Seeber	2005	2004-12-01	Journal of Clinical Oncology	PURPOSE: BAY 43-9006 is a novel dual-action Raf kinase and vascular endothelial growth factor receptor inhibitor that inhibits tumor cell proliferation and angiogenesis. This study established the safety and pharmacokinetics of BAY 43-9006 in 69 patients with advanced refractory solid tumors. PATIENTS AND METHODS: BAY 43-9006 (50 to 800 mg) was administered once or twice daily on a varying weekly…	15613696	Mixed	MTD	DLT	PK profile	1	0	p1	industry	single	Germany	Europe	positive	acceptable	1	0	0							66	66		1	1		1					Colon, ovary, breast, HCC, pancreas, kidney, GI, skin	no	no	2000-07-01	2003-02-01	2000-07-01	19	0	0
793	Phase II study of sorafenib in combination with docetaxel and cisplatin in the treatment of metastatic or advanced gastric and gastroesophageal junction adenocarcinoma: ECOG 5203	W. Sun, M. Powell, P. J. O'Dwyer, P. Catalano, R. H. Ansari and A. B. Benson, 3rd	2010	2010-05-01	Journal of Clinical Oncology	PURPOSE: The combination of sorafenib with chemotherapy is well-tolerated and is associated with encouraging response rates in several malignances. Both docetaxel and cisplatin are active in gastric cancer. A phase II study was conducted to determine the efficacy and toxicity of combined sorafenib, docetaxel, and cisplatin in patients with metastatic or advanced adenocarcinoma of stomach or gastr…	20458043	Gastric	ORR			0	1	p2	non-industry	multi	United States	N America	positive	acceptable	0	1	0	Cisplatin + Docetaxel						44		44	18		18	1	1		1		Metastatic or Advanced Gastric and Gastroesophageal Junction Adenocarcinoma	no	no	2007-02-01	2012-03-01	2007-02-01	13.5	2
794	Phase II evaluation of sorafenib in advanced and metastatic squamous cell carcinoma of the head and neck: Southwest Oncology Group Study S0420	S. K. Williamson, J. Moon, C. H. Huang, P. P. Guaglianone, M. LeBlanc, G. T. Wolf and S. G. Urba	2010	2010-05-01	Journal of Clinical Oncology	PURPOSE: We conducted a phase II trial to evaluate the efficacy and safety of single-agent sorafenib in chemotherapy-naive patients with metastatic or recurrent squamous cell carcinoma of the head and neck (SCCHN). The primary end point was response probability (ie, confirmed complete and partial response [PR]). PATIENTS AND METHODS: Chemotherapy-naive patients with metastatic, persistent, or rec…	20498388	HNC	ORR			1	0	p2	non-industry	multi	United States	N America	negative	acceptable	1	0	0							41	41		1	1		1					Metastatic or recurrent SCCHN	no	no	2004-10-01	2006-03-01	2004-10-01	16	0	0
795	Safety and pharmacokinetics of sorafenib combined with capecitabine in patients with advanced solid tumors: results of a phase 1 trial	A. Awada, T. Gil, N. Whenham, J. Van Hamme, T. Besse-Hammer, E. Brendel, H. Delesen, M. C. Joosten, C. D. Lathia, B. A. Loembe, M. Piccart-Ghebart and A. Hendlisz	2011	2011-12-01	Journal of Clinical Pharmacology	Sorafenib (twice daily [bid]) plus capecitabine (2 weeks on schedule/1 week off schedule) safety and pharmacokinetics were investigated in patients with advanced solid tumors (N = 35). Cohort 1 (n = 13) included sorafenib 200 mg bid and capecitabine 1050 mg/m(2) bid; cohort 2 (n = 4), sorafenib 400 mg bid and capecitabine 1050 mg/m(2) bid; cohort 3 (n = 6), sorafenib 200 mg bid and capecitabine 1…	21209247	Mixed	MTD	Preliminary efficacy	*general, no primary	0	1	p1	industry	single	Belgium	Europe	positive	acceptable	0	1	0	Capecitabine						35			0			NO-ORR					Breast, colorectal, melanoma, pancreatic, renal cancers	no	no	2002-11-06	2005-06-29	2002-11-06	18	0
796	Phase II study of combining sorafenib with metronomic tegafur/uracil for advanced hepatocellular carcinoma	C.-H. Hsu, Y.-C. Shen, Z.-Z. Lin, P.-J. Chen, Y.-Y. Shao, Y.-H. Ding, C. Hsu and A.-L. Cheng	2010	2010-03-01	Journal of Hepatology	BACKGROUND & AIMS: Sorafenib, a multi-kinase inhibitor with anti-angiogenic activity, was recently approved for the treatment of advanced hepatocellular carcinoma (HCC). Metronomic chemotherapy using tegafur/uracil (4:1 molar ratio), an oral fluoropyrimidine, has been shown to enhance the anti-tumor effect of anti-angiogenic agents in preclinical models. This phase II study evaluated the efficacy…	20416968	HCC	PFS			0	1	p2	non-industry	single	Taiwan	Asia	negative	acceptable	0	1	0	Tegafur-Uracil						53		53	4		4	1					Advanced HCC	no	no	2007-04-01	2008-04-01	2007-04-01	16	0
797	Phase II study of concurrent transarterial chemoembolization and sorafenib in patients with unresectable hepatocellular carcinoma	J.-W. Park, Y. H. Koh, H. B. Kim, H. Y. Kim, S. An, J.-I. Choi, S. M. Woo and B.-H. Nam	2012	2012-02-01	Journal of Hepatology	BACKGROUND & AIMS: Transarterial chemoembolization (TACE) is an important palliative treatment for unresectable hepatocellular carcinoma (HCC), but TACE-induced ischemic injury can upregulate angiogenic factors and is associated with poor prognosis. The aim of this study was to evaluate the safety and efficacy of concurrent conventional TACE and sorafenib in patients with unresectable HCC. METHOD…	22314421	HCC	TTP			0	1	p2	non-industry	single	Korea South	Asia	positive	acceptable	0	1	0	Doxorubicin-TACE						50		50	22		22	1					Unresectable HCC	no	no	2009-07-01	2011-05-01	2009-07-01	23	0
798	Effect of CYP3A-inducing anti-epileptics on sorafenib exposure: results of a phase II study of sorafenib plus daily temozolomide in adults with recurrent glioblastoma	D. A. Reardon, J. J. Vredenburgh, A. Desjardins, K. Peters, S. Gururangan, J. H. Sampson, J. Marcello, J. E. Herndon, 2nd, R. E. McLendon, D. Janney, A. H. Friedman, D. D. Bigner and H. S. Friedman	2011	2010-05-01	Journal of Neuro-Oncology	Sorafenib, an oral VEGFR-2, Raf, PDGFR, c-KIT and Flt-3 inhibitor, is active against renal cell and hepatocellular carcinomas, and has recently demonstrated promising activity for lung and breast cancers. In addition, various protracted temozolomide dosing schedules have been evaluated as a strategy to further enhance its anti-tumor activity. We reasoned that sorafenib and protracted, daily temoz…	20443129	Glioma	PFS-6			0	1	p2	non-industry	single	United States	N America	negative	acceptable	0	1	0	Temozolomide						32		32	1		1	1					Recurrent glioblastoma	no	no	2007-10-01	2008-11-01	2007-10-01	26	0
799	A phase II study of sorafenib in malignant mesothelioma: results of Cancer and Leukemia Group B 30307	S. Dubey, P. A. Janne, L. Krug, H. Pang, X. Wang, R. Heinze, C. Watt, J. Crawford, R. Kratzke, E. Vokes and H. L. Kindler	2010	2010-10-01	Journal of Thoracic Oncology: Official Publication of the International Association for the Study of Lung Cancer	HYPOTHESIS: Malignant mesotheliomas (MMs) express vascular endothelial growth factor receptor (VEGFR), platelet-derived growth factor receptor, and cKIT. Sorafenib is a potent inhibitor of the ras/raf/MEK pathway and also targets VEGFR and cKIT. We evaluated the activity of sorafenib in patients with unresectable mesothelioma. METHODS: MM patients who had received 0 to 1 prior chemotherapy regime…	20736856	Mesothelioma	ORR			1	0	p2	non-industry	multi	United States	N America	inconclusive	na	1	0	0							50	50		3	3		1					Malignant mesothelioma	no	no	2004-10-01	2005-08-01	2004-10-01	12	0	0
800	Sorafenib in platinum-treated patients with extensive stage small cell lung cancer: a Southwest Oncology Group (SWOG 0435) phase II trial	B. J. Gitlitz, J. Moon, B. S. Glisson, H. J. Reimers, M. J. Bury, J. D. Floyd, T. K. Schulz, P. K. Sundaram, C. Ho and D. R. Gandara	2010	2010-11-01	Journal of Thoracic Oncology: Official Publication of the International Association for the Study of Lung Cancer	INTRODUCTION: Sorafenib is a multikinase inhibitor affecting pathways involved in tumor progression and angiogenesis. We conducted a phase II trial of sorafenib in platinum-treated patients with extensive stage small cell lung cancer to determine the tumor response rate, toxicity, and overall survival. METHODS: Patients with histologically confirmed, measurable disease, Zubrod performance status …	20881645	SCLC	ORR			1	0	p2	non-industry	multi	United States	N America	negative	acceptable	1	0	0							83	83		1	1		1					Platinum-treated relapsed/refractorty extensive SCLC	no	no	2005-07-01	2007-02-01	2005-07-01	8	1	1
802	Activity of a multitargeted chemo-switch regimen (sorafenib, gemcitabine, and metronomic capecitabine) in metastatic renal-cell carcinoma: a phase 2 study (SOGUG-02-06)	J. Bellmunt, J. M. Trigo, E. Calvo, J. Carles, J. L. Perez-Gracia, J. Rubio, J. A. Virizuela, R. Lopez, M. Lazaro and J. Albanell	2010	2010-02-01	Lancet Oncology	BACKGROUND: Maximum tolerated dose (MTD) chemotherapy followed by metronomic chemotherapy (low doses given on a frequent schedule) acts on tumour vascular endothelial cells by increasing the anti-tumour effect of anti-angiogenic agents. This multicentre, phase 2 study investigated the effectiveness of MTD gemcitabine combined with metronomic capecitabine plus the multikinase inhibitor sorafenib f…	20163987	RCC	PFS			0	1	p2	non-industry	multi	Spain	Europe	positive	acceptable	0	1	0	Capecitabine + Gemcitabine						40		40	20		20	1	1		1		Metastatic RCC	no	no	2006-12-01	2008-04-01	2006-12-01	37	1
803	Efficacy and safety of sorafenib in patients in the Asia-Pacific region with advanced hepatocellular carcinoma: a phase III randomised, double-blind, placebo-controlled trial	A.-L. Cheng, Y.-K. Kang, Z. Chen, C.-J. Tsao, S. Qin, J. S. Kim, R. Luo, J. Feng, S. Ye, T.-S. Yang, J. Xu, Y. Sun, H. Liang, J. Liu, J. Wang, W. Y. Tak, H. Pan, K. Burock, J. Zou, D. Voliotis and Z. Guan	2009	2008-12-01	Lancet Oncology	BACKGROUND: Most cases of hepatocellular carcinoma occur in the Asia-Pacific region, where chronic hepatitis B infection is an important aetiological factor. Assessing the efficacy and safety of new therapeutic options in an Asia-Pacific population is thus important. We did a multinational phase III, randomised, double-blind, placebo-controlled trial to assess the efficacy and safety of sorafenib…	19095497	HCC	No primary endpoint			1	0	p3	industry	multi	Taiwan	Asia	inconclusive	acceptable	1	0	1			Placebo				149	149		5	5		1					Advanced (unresectable or metastatic) HCC	yes	yes	2005-09-01	2007-01-01	2005-09-01	10	0	0
804	A randomized phase I clinical and biologic study of two schedules of sorafenib in patients with myelodysplastic syndrome or acute myeloid leukemia: a NCIC (National Cancer Institute of Canada) Clinical Trials Group Study	M. Crump, D. Hedley, S. Kamel-Reid, B. Leber, R. Wells, J. Brandwein, R. Buckstein, J. Kassis, M. Minden, J. Matthews, S. Robinson, R. Turner, L. McIntosh, E. Eisenhauer and L. Seymour	2010	2010-02-01	Leukemia & Lymphoma	Sorafenib is a small molecule inhibitor of RAF kinase, VEGFR-2, c-KIT, and FLT3. In this randomized phase I study, eligible patients had relapsed/refractory acute myeloid leukemia (AML), and one prior induction regimen, or were age >65 with untreated myelodysplastic syndrome (MDS) or secondary AML. Sorafenib was given orally for 28 days (cont) or 14 days (int) every 4 weeks at three dose levels (…	20109071	Leukaemia	MTD	PK profile	PD	1	0	p1	ns	multi	Canada	N America	positive	acceptable	1	0	0							30	30		0	0		NON-SOLID					Myelodysplastic syndrome or AML	yes	no	2001-10-01	2004-04-01	2001-10-01	4	1	1
805	A phase I trial of sorafenib combined with cisplatin/etoposide or carboplatin/pemetrexed in refractory solid tumor patients	J. M. Davies, N. S. Dhruva, C. M. Walko, M. A. Socinski, S. Bernard, D. N. Hayes, W. Y. Kim, A. Ivanova, K. Keller, L. R. Hilbun, M. Chiu, E. C. Dees and T. E. Stinchcombe	2011	2010-07-01	Lung Cancer	INTRODUCTION: Sorafenib has demonstrated single agent activity in non-small cell (NSCLC) and small cell lung cancer (SCLC). Carboplatin/pemetrexed (CbP) and cisplatin/etoposide (PE) are commonly used in the treatment of these diseases. METHODS: A phase I trial escalating doses of sorafenib in combination with fixed doses of PE (Arm A) or CbP (Arm B) was performed using a 3-patient cohort design t…	20580118	Mixed	MTD			0	1	p1	non-industry	single	United States	N America	positive	acceptable	0	1	0	Cisplatin + Etoposide	Carboplatin + Pemetrexed					10		10	2		2	1					NSCLC, SCLC, esophageal cancer, thymoma, atypical carcinoid lung cancer, salivary gland, Mucoepidermoid, gastric cancer, RCC, SCCHN, hurthle cell, melanoma	no	no	2007-09-01	2008-09-01	2007-09-01	6	1
808	Phase I trial of sorafenib in patients with recurrent or progressive malignant glioma	L. B. Nabors, J. G. Supko, M. Rosenfeld, M. Chamberlain, S. Phuphanich, T. Batchelor, S. Desideri, X. Ye, J. Wright, S. Gujar, S. A. Grossman and C. N. S. C. New Approaches to Brain Tumor Therapy	2011	2011-09-01	Neuro-Oncology	Sorafenib is an inhibitor of multiple kinases that has demonstrated antiproliferative and antiangiogenic activity in a number of in vitro and in vivo model systems. A phase I study was conducted to determine the maximum tolerated dose (MTD) of sorafenib in patients with recurrent malignant glioma. Sorafenib was given orally, twice a day (BID), continuously in 28-day cycles. The dose was escalated…	21954442	Glioma	MTD	Safety		1	0	p1	non-industry	multi	United States	N America	positive	acceptable	1	0	0							47			0			NO-ORR					Recurrent or progressive malignant glioma	no	no	2004-12-01	2010-10-01	2004-12-01	4	0	0
809	Sorafenib in advanced clear-cell renal-cell carcinoma.[Erratum appears in N Engl J Med. 2007 Jul 12;357(2):203]	B. Escudier, T. Eisen, W. M. Stadler, C. Szczylik, S. Oudard, M. Siebels, S. Negrier, C. Chevreau, E. Solska, A. A. Desai, F. Rolland, T. Demkow, T. E. Hutson, M. Gore, S. Freeman, B. Schwartz, M. Shan, R. Simantov, R. M. Bukowski and T. S. Group	2007	2007-01-01	New England Journal of Medicine	BACKGROUND: We conducted a phase 3, randomized, double-blind, placebo-controlled trial of sorafenib, a multikinase inhibitor of tumor-cell proliferation and angiogenesis, in patients with advanced clear-cell renal-cell carcinoma. METHODS: From November 2003 to March 2005, we randomly assigned 903 patients with renal-cell carcinoma that was resistant to standard therapy to receive either continuou…	17215530	RCC	OS			1	0	p3	industry	multi	France	Europe	negative	acceptable	1	0	1			Placebo				451	451		44	44		1					Advanced clear-cell RCC	yes	yes	2003-11-01	2005-03-01	2003-11-01	23	2	2
810	Sorafenib in advanced hepatocellular carcinoma	J. M. Llovet, S. Ricci, V. Mazzaferro, P. Hilgard, E. Gane, J.-F. Blanc, A. C. de Oliveira, A. Santoro, J.-L. Raoul, A. Forner, M. Schwartz, C. Porta, S. Zeuzem, L. Bolondi, T. F. Greten, P. R. Galle, J.-F. Seitz, I. Borbath, D. Haussinger, T. Giannaris, M. Shan, M. Moscovici, D. Voliotis, J. Bruix and S. I. S. Group	2008	2008-07-01	New England Journal of Medicine	BACKGROUND: No effective systemic therapy exists for patients with advanced hepatocellular carcinoma. A preliminary study suggested that sorafenib, an oral multikinase inhibitor of the vascular endothelial growth factor receptor, the platelet-derived growth factor receptor, and Raf may be effective in hepatocellular carcinoma. METHODS: In this multicenter, phase 3, double-blind, placebo-controlle…	18650514	HCC	OS	TTP (symptomatic)		1	0	p3	industry	multi	Spain	Europe	inconclusive	acceptable	1	0	1			Placebo				297	297		7	7		1					Advanced HCC	yes	yes	2005-03-01	2006-04-01	2005-03-01	23	0	0
811	Continuous administration of sorafenib in combination with transarterial chemoembolization in patients with hepatocellular carcinoma: results of a phase I study	J.-F. Dufour, H. Hoppe, M. H. Heim, B. Helbling, O. Maurhofer, Z. Szucs-Farkas, R. Kickuth, M. Borner, D. Candinas and B. Saar	2010	2010-10-01	Oncologist	BACKGROUND AND AIM: It is unknown whether sorafenib can be combined with transarterial chemoembolization (TACE) in patients with hepatocellular carcinoma. This study assesses the safety and tolerability of a continuous regimen of sorafenib combined with TACE. METHODS: This was an open-label phase I study testing a continuous administration of sorafenib (dose escalation from 200 mg twice daily [bi…	21036880	HCC	Safety			0	1	p1	industry	single	Switzerland	Europe	positive	acceptable	0	1	0	Doxorubicin-TACE						14			0			NO-ORR					Inoperable HCC	no	no	2007-05-01	2009-01-01	2007-05-01	35	0
817	A phase II trial of sorafenib in metastatic melanoma with tissue correlates	P. A. Ott, A. Hamilton, C. Min, S. Safarzadeh-Amiri, L. Goldberg, J. Yoon, H. Yee, M. Buckley, P. J. Christos, J. J. Wright, D. Polsky, I. Osman, L. Liebes and A. C. Pavlick	2010	2010-12-01	PLoS ONE [Electronic Resource]	BACKGROUND: Sorafenib monotherapy in patients with metastatic melanoma was explored in this multi-institutional phase II study. In correlative studies the impact of sorafenib on cyclin D1 and Ki67 was assessed. METHODOLOGY/PRINCIPAL FINDINGS: Thirty-six patients treatment-naive advanced melanoma patients received sorafenib 400 mg p.o. twice daily continuously. Tumor BRAF(V600E) mutational status …	21206909	Melanoma	ORR			1	0	p2	non-industry	multi	United States	N America	negative	acceptable	1	0	0							36	36		1	1		1	1			1	Unresectable stage III or IV melanoma	no	no	2005-08-01	2007-09-01	2005-08-01	9	0	0
819	Response to sorafenib at a low dose in patients with radioiodine-refractory pulmonary metastases from papillary thyroid carcinoma	L. Chen, Y. Shen, Q. Luo, Y. Yu, H. Lu and R. Zhu	2011	2010-12-01	Thyroid	BACKGROUND: Sorafenib has shown promise in the treatment of patients with advanced or metastatic thyroid carcinoma. However, the optimal dose has not been established and data on Chinese population are not available. We conducted a study to assess the responses to sorafenib at a low dose of 200[THIN SPACE]mg twice daily in patients with progressive radioiodine-refractory pulmonary metastases from…	21186953	Thyroid	ORR			1	0	p2	non-industry	single	China	Asia	positive	acceptable	1	0	0							9	9		3	3		1					radioiodine-refractory pulmonary metastases from PTC	no	no	2007-02-01	2008-05-01	2007-02-01	13	0	0
820	Safety and efficacy of sorafenib in patients with castrate resistant prostate cancer: a Phase II study	M. R. Safarinejad	2010	2008-09-01	Urologic Oncology	PURPOSE: We determined the safety and efficacy of sorafenib in patients with castrate resistant prostate cancer (CRPC). METHODS: Sixty-four chemotherapy and radiotherapy naive patients with CRPC received 400 mg sorafenib orally twice daily in 6-week cycles. All patients had bone metastasis, while 16 had lymph node-, 9 had liver-, and 10 had lung metastases. Treatment was continued until disease p…	18789732	Prostate	PSA response			1	0	p2	ns	single	Iran	Asia	negative	acceptable	1	0	0							64	64		5	5		1					CRPC	no	no	2004-01-01	2006-02-01	2004-01-01	38	0	0
855	Phase II Trial of Temozolomide and Sorafenib in Advanced Melanoma Patients with or without Brain Metastases	Amaravadi RK, Schuchter LM, McDermott DF, Kramer A, Giles L, Gramlich K, Carberry M, Troxel AB, Letrero R, Nathanson KL, Atkins MB, O'Dwyer PJ, Flaherty KT	2009	2009-12-01	Clin Cancer Res	NULL	NULL	Melanoma	PFS-6			0	1	p2	non-industry	not_stated	United States	N America	positive	acceptable	0	1	0	Temozolomide						169		169	23		23	1	1		1		melanoma with or without brain metastases	yes	no	2005-06-01	2008-05-01	2005-06-01	26	0
5183	The combination of sorafenib with transarterial chemoembolisation for hepatocellular carcinoma	Cabrera R, Pannu DS, Caridi J, Firpi RJ, Soldevila-Pico C, Morelli G, Clark V, Suman A, George TJ Jr, Nelson DR	2011	2011-05-01	Alimentary Pharmacology & Therapeutics	NULL	NULL	HCC	General safety/efficacy			0	1	p2	non-industry	single	United States	N America	positive	acceptable	0	1	0	Doxorubicin-TACE						41		41	23		23	1					intermediate or advanced stage HCC	no	no	2007-01-01	2010-12-01	2007-01-01	26	0
5258	A pharmacodynamic study of sorafenib in patients with relapsed and refractory acute leukemias	Pratz KW, Cho E, Levis MJ, Karp JE, Gore SD, McDevitt M, Stine A, Zhao M, Baker SD, Carducci MA, Wright JJ, Rudek MA, Smith BD	2010	2010-06-01	Leukemia	NULL	NULL	Leukaemia	PD (KRAS correlation to response)			1	0	p1	non-industry	not_stated	United States	N America	positive	acceptable	1	0	0							15	15		0	0		NON-SOLID					relapsed and refractory acute leukemias	no	no	2005-07-25	2007-02-21	2005-07-25	4	0	0
5381	A phase II trial of intrapatient dose-escalated sorafenib in patients with metastatic renal cell carcinoma	R. Amato, J. Zhai, J. Willis, S. Saxena and M. Defoe	2012	2012-05-01	Clinical Genitourinary Cancer	Purpose: Sorafenib has been demonstrated as second-line therapy, with limited significant adverse events at a dose of 400 mg twice a day (b.i.d.) in patients with metastatic renal cell carcinoma. This study evaluated the ability of patients to dose-escalate, response rate, progression-free survival (PFS), and overall survival. Methods: The initial dose of sorafenib was 400 mg b.i.d. Dose escalati…	2012479373	RCC	Safety			1	0	p2	ns	not_stated	United States	N America	positive	acceptable	1	0	0							44	44		21	21		1					Metastatic RCC	no	no	2005-12-01	2006-11-01	2005-12-01	34	0	0
5383	Phase i trial of everolimus plus sorafenib for Patients with advanced renal cell cancer	R. J. Amato, A. L. Flaherty and M. Stepankiw	2012	2011-12-01	Clinical Genitourinary Cancer	Background: Everolimus, a mammalian target of rapamycin (mTOR) inhibitor, and sorafenib, a RAF kinase inhibitor, has shown efficacy in renal cell cancer (RCC) as single agents. We conducted a phase I study to evaluate the maximum tolerated dose (MTD) of combining these agents for potential additive or synergistic effects when treating progressive metastatic RCC (mRCC). Patients and Methods: The 1…	2012104623	RCC	MTD	Safety		0	1	p1	industry	not_stated	United States	N America	positive	acceptable	0	1	0	Everolimus						15		15	6		6	1					histologically confirmed predominant cRCC	no	no	2007-01-01	2008-03-01	2007-01-01	4	0
5413	A phase II study of sorafenib in combination with bicalutamide in patients with chemotherapy-naive castration resistant prostate cancer	E. K. Beardsley, S. J. Hotte, S. North, S. L. Ellard, E. Winquist, C. Kollmannsberger, S. D. Mukherjee and K. N. Chi	2012	2011-07-01	Investigational New Drugs	Purpose The objective of this trial was to evaluate the clinical effects of sorafenib, a multi-targeted kinase inhibitor, in combination with androgen receptor blockade in patients with castration-resistant prostate cancer. Methods This was a multicenter, two-stage, phase 2 trial. Eligible patients had rising PSA, minimal symptoms and were chemotherapy-naive. Sorafenib 400 mg twice daily was admi…	2012566574	Prostate	>50% PSA decline (PSA response) or SD > 6 months			0	1	p2	industry	multi	Canada	N America	positive	acceptable	0	1	0	Bicalutamide						14		14	0		0	1					chemotherapy-naive castration resistant prostate cancer	no	no	2007-04-01	2008-11-01	2007-04-01	20	1
5415	A phase I multi-institutional study of systemic sorafenib in conjunction with regional melphalan for in-transit melanoma of the extremity	G. M. Beasley, A. P. Coleman, A. Raymond, G. Sanders, M. A. Selim, B. L. Peterson, M. S. Brady, M. A. Davies, C. Augustine and D. S. Tyler	2012	2012-05-01	Annals of Surgical Oncology	Background. Isolated limb infusion with melphalan (ILIM) corrected for ideal body weight (IBW) is a well-tolerated treatment for patients with in-transit extremity melanoma with an approximate 29 % complete response (CR) rate. Sorafenib, a multi-kinase inhibitor, has been shown to augment tumor response to chemotherapy in preclinical studies. Methods. A multi-institutional, dose-escalation, phase…	2012632272	Melanoma	ORR	PK	MTD, safety	0	1	p1	non-industry	multi	United States	N America	inconclusive	unacceptable	0	1	0	Melphalan						19		19	7		7	1					AJCC stage IIIB/IIIC/IV melanoma, In-Transit Melanoma of the Extremity	no	no	2007-10-01	2009-08-01	2007-10-01	12	0
5421	Phase II study of weekly paclitaxel and sorafenib as second/third-line therapy in patients with adrenocortical carcinoma	A. Berruti, P. Sperone, A. Ferrero, A. Germano, A. Ardito, A. M. Priola, S. De Francia, M. Volante, F. Daffara, D. Generali, S. Leboulleux, P. Perotti, E. Baudin, M. Papotti and M. Terzolo	2012	2011-12-01	European Journal of Endocrinology	Background: There is a strong rationale in the use of antiangiogenic therapy in the management of adrenocortical carcinoma (ACC). Metronomic administration of chemotherapy and antiangiogenic drugs can be synergistic in targeting endothelial cells. Objective:We assessed the activity of sorafenib plus metronomic paclitaxel as second/third-line therapy in advanced ACC patients. We also tested the ac…	2012140688	Adrenocortical	PFS-4			0	1	p2	non-industry	multi	Italy	Europe	negative	acceptable	0	1	0	Paclitaxel						9		9	0		0	1					Metastatic adrenocortical carcinoma	no	no	2008-11-01	2009-02-01	2008-11-01	17	0
5426	Phase II Trial of Sorafenib in Combination with Carboplatin and Paclitaxel in Patients with Metastatic Uveal Melanoma: SWOG S0512	S. Bhatia, J. Moon, K. A. Margolin, J. S. Weber, C. D. Lao, M. Othus, A. M. Aparicio, A. Ribas and V. K. Sondak	2012	2012-11-01	PLoS ONE	Background: Sorafenib, a multikinase inhibitor of cell proliferation and angiogenesis, inhibits the mitogen-activated protein kinase pathway that is activated in most uveal melanoma tumors. This phase II study was conducted by the SWOG cooperative group to evaluate the efficacy of sorafenib in combination with carboplatin and paclitaxel (CP) in metastatic uveal melanoma. Methods: Twenty-five pati…	0	Melanoma	ORR			0	1	p2	non-industry	multi	United States	N America	negative	acceptable	0	1	0	Carboplatin + Paclitaxel						24		24	0		0	1					Metastatic uveal melanoma	no	no	2006-03-01	2009-01-01	2006-03-01	16	0
5541	SWOG 0514: A phase II study of sorafenib in patients with unresectable or metastatic gallbladder carcinoma and cholangiocarcinoma	A. B. El-Khoueiry, C. J. Rankin, E. Ben-Josef, H. J. Lenz, P. J. Gold, R. D. Hamilton, R. Govindarajan, C. Eng and C. D. Blanke	2012	2011-07-01	Investigational New Drugs	Objectives Gallbladder and cholangiocarcinomas represent a heterogeneous group of malignant diseases that commonly present at an advanced stage and have limited therapeutic options. Based on the role of the Ras-Raf-Mek-Erk pathway and the VEGF axis in biliary carcinomas, we conducted a phase II study of sorafenib in patients with advanced biliary cancers. Methods Eligible patients had no prior th…	2012566573	Biliary tract	ORR			1	0	p2	non-industry	not_stated	United States	N America	negative	unacceptable	1	0	0							25	25		0	0		1					unresectable or metastatic gallbladder carcinoma and cholangiocarcinoma	no	no	2005-10-01	2007-01-01	2005-10-01	8	1	1
5600	BAYPAN study: A double-blind phase III randomized trial comparing gemcitabine plus sorafenib and gemcitabine plus placebo in patients with advanced pancreatic cancer	A. Goncalves, M. Gilabert, E. Francois, L. Dahan, H. Perrier, R. Lamy, D. Re, R. Largillier, M. Gasmi, X. Tchiknavorian, B. Esterni, D. Genre, L. Moureau-Zabotto, M. Giovannini, J. F. Seitz, J. R. Delpero, O. Turrini, P. Viens and J. L. Raoul	2012	2012-07-01	Annals of Oncology	Background: Sorafenib is an oral anticancer agent targeting Ras-dependent signaling and angiogenic pathways. A phase I trial demonstrated that the combination of gemcitabine and sorafenib was well tolerated and had activity in advanced pancreatic cancer (APC) patients. The BAYPAN study was a multicentric, placebo-controlled, double-blind, randomized phase III trial comparing gemcitabine/sorafenib…	2012639280	Pancreatic	PFS			0	1	p3	ns	multi	France	Europe	negative	acceptable	0	1	1	Gemcitabine		Gemcitabine + Placebo				52		52	12		12	1					Locally advanced or metastatic pancreatic adenocarcinoma	yes	yes	2006-12-01	2009-09-01	2006-12-01	20	1
5606	A phase II trial of sorafenib in relapsed and unresectable high-grade osteosarcoma after failure of standard multimodal therapy: An Italian sarcoma group study	G. Grignani, E. Palmerini, P. Dileo, S. D. Asaftei, L. D'Ambrosio, Y. Pignochino, M. Mercuri, P. Picci, F. Fagioli, P. G. Casali, S. Ferrari and M. Aglietta	2012	2011-04-01	Annals of Oncology	Purpose: After standard multimodal therapy, the prognosis of relapsed and unresectable high-grade osteosarcoma is dismal and unchanged over the last decades. Recently, mitogen-activated protein kinases were shown to be activated in osteosarcoma specimens, suggesting, therefore, they are suitable targets for the multikinase inhibitor sorafenib. Thus, we explored sorafenib activity in patients with…	2012062543	Osteosarcoma	PFS-4			1	0	p2	non-industry	multi	Italy	Europe	positive	acceptable	1	0	0							35	35		3	3		1	1		1		Unresectable and relapsed high-grade osteosarcoma	no	no	2008-01-01	2009-12-01	2008-01-01	19	0	0
5616	Phase II study of sorafenib in patients with relapsed or refractory lymphoma	A. Guidetti, C. Carlo-Stella, S. L. Locatelli, W. Malorni, M. Pierdominici, C. Barbati, R. Mortarini, L. Devizzi, P. Matteucci, A. Marchiano, R. Lanocita, L. Farina, A. Dodero, C. Tarella, M. Di Nicola, P. Corradini, A. Anichini and A. M. Gianni	2012	2012-05-01	British Journal of Haematology	The safety and activity of the multikinase inhibitor sorafenib were investigated in patients with relapsed or refractory lymphoproliferative disorders who received sorafenib (400 mg) twice daily until disease progression or appearance of significant clinical toxicity. The primary endpoint was overall response rate (ORR). Biomarkers of sorafenib activity were analysed at baseline and during treatm…	2012340787	Lymphoma	ORR			1	0	p2	non-industry	single	Italy	Europe	positive	acceptable	1	0	0							30	30		0	0		NON-SOLID	1		1		DLBCL, FL, MCL, CLL, LPL, MZL, T-NHL, HL, relapsed or refractory lymphoma	no	no	2008-03-01	2010-07-01	2008-03-01	17	0	0
5726	Phase I/II study of sorafenib in combination with temsirolimus for recurrent glioblastoma or gliosarcoma: North American Brain Tumor Consortium study 05-02	E. Q. Lee, J. Kuhn, K. R. Lamborn, L. Abrey, L. M. Deangelis, F. Lieberman, H. Ian Robins, S. M. Chang, W. K. Alfred Yung, J. Drappatz, M. P. Mehta, V. A. Levin, K. Aldape, J. E. Dancey, J. J. Wright, M. D. Prados, T. F. Cloughesy, M. R. Gilbert and P. Y. Wen	2012	2012-10-01	Neuro-Oncology	The activity of single-agent targeted molecular therapies in glioblastoma has been limited to date. The North American Brain Tumor Consortium examined the safety, pharmacokinetics, and efficacy of combination therapy with sorafenib, a small molecule inhibitor of Raf, vascular endothelial growth factor receptor 2, and platelet-derived growth factor receptor-beta, and temsirolimus (CCI-779), an inh…	2012674839	Glioma	PFS-6	MTD		0	1	p1-2	non-industry	multi	United States	N America	negative	unacceptable	0	1	0	Temsirolimus						17		17	2		2	1					Histologically confirmed GBM or gliosarcoma with unequivocal tumor recurrence by MRI scan	no	no	2006-04-01	2010-02-01	2006-04-01	26	0
5733	Phase 1 trial of S-1 in combination with sorafenib for patients with advanced hepatocellular carcinoma	S. J. Lee, J. Lee, S. H. Park, J. O. Park, Y. S. Park, W. K. Kang, J. Lee, D. S. Yim and H. Y. Lim	2012	2011-06-01	Investigational New Drugs	PURPOSE: Sorafenib is a multi-kinase inhibitor, which was approved as first-line treatment for patients with advanced hepatocellular carcinoma (HCC). We conducted a phase 1 study of sorafenib plus S-1 in patients with advanced HCC. EXPERIMENTAL DESIGN: We designed to escalate S-1 at 4 different dose levels with fixed dose of sorafenib. Four dose levels were as follows: level 1, D1-14 S-1 50 mg/m(…	21695438	HCC	MTD	Safety		0	1	p1	ns	single	Korea South	Asia	positive	acceptable	0	1	0	S-1						17		17	1		1	1					Advanced HCC	no	no	2009-08-01	2010-07-01	2009-08-01	12	0
5763	Sorafenib treatment of FLT3-ITD(+) acute myeloid leukemia: favorable initial outcome and mechanisms of subsequent nonresponsiveness associated with the emergence of a D835 mutation	C. H. Man, T. K. Fung, C. Ho, H. H. Han, H. C. Chow, A. C. Ma, W. W. Choi, S. Lok, A. M. Cheung, C. Eaves, Y. L. Kwong and A. Y. Leung	2012	2012-02-01	Blood	Internal tandem duplication (ITD) of the fms-related tyrosine kinase-3 (FLT3) gene occurs in 30% of acute myeloid leukemias (AMLs) and confers a poor prognosis. Thirteen relapsed or chemo-refractory FLT3-ITD(+) AML patients were treated with sorafenib (200-400 mg twice daily). Twelve patients showed clearance or near clearance of bone marrow myeloblasts after 27 (range 21-84) days with evidence o…	22368270	Leukaemia	remission			1	0	p2	non-industry	not_stated	China	Asia	positive	acceptable	1	0	0							13			0			NON-SOLID					FLT3-ITD+ AML	no	no	2009-12-30	2011-09-22	2009-12-30	10	0	0
5769	Phase I study of sorafenib in combination with docetaxel and prednisone in chemo-naive patients with metastatic castration-resistant prostate cancer	F. Mardjuadi, J. Medioni, J. Kerger, L. D'Hondt, J. L. Canon, L. Duck, F. Musuamba, S. Oudard, M. Clausse, A. Moxhon and J. P. Machiels	2012	2012-07-01	Cancer Chemotherapy and Pharmacology	Purpose We performed a dose-escalation study to investigate the safety of sorafenib in combination with docetaxel and prednisone in chemo-naive patients with metastatic castration-resistant prostate cancer (mCRPC). Methods Six patients were included per dose level. Following docetaxel infusion on day 1 (75 mg/m<sup>2</sup>/q<sup>3</sup> weeks), sorafenib was administered at 200 mg BID on days 2-1…	2012561306	Prostate	RP2D	Safety		0	1	p1	non-industry	multi	Belgium	Europe	inconclusive	unacceptable	0	1	0	Docetaxel + Prednisone						23		23	13		13	1					Metastatic CRPC	no	no	2006-10-01	2009-05-01	2006-10-01	18	1
5820	Phase i study investigating the safety and feasibility of combining imatinib mesylate (Gleevec) with sorafenib in patients with refractory castration-resistant prostate cancer	C. Nabhan, D. Villines, T. V. Valdez, K. Tolzien, T. M. Lestingi, J. D. Bitran, S. M. Christner, M. J. Egorin and J. H. Beumer	2012	2012-07-01	British Journal of Cancer	Background: Determining the maximum tolerated dose (MTD) and the dose-limiting toxicity (DLT) of sorafenib (S) plus imatinib (IM) in castration-resistant prostate cancer (CRPC) patients.Methods:Refractory CRPC patients were enrolled onto this 33 dose escalation designed study. Imatinib pharmacokinetics (PK) were determined on day 15, 4 h post dose with a validated LC-MS assay.Results:Seventeen pa…	2012473517	Prostate	MTD	DLT		0	1	p1	non-industry	not_stated	United States	N America	positive	acceptable	0	1	0	Imatinib						10		10	0		0	1					Refractory CRPC	no	no	2007-01-01	2012-02-01	2007-01-01	8	0
5830	Phase i trial of sorafenib in combination with interferon-alpha in Japanese patients with unresectable or metastatic renal cell carcinoma	M. Niwakawa, K. Hashine, R. Yamaguchi, H. Fujii, Y. Hamamoto, K. Fukino, T. Tanigawa and Y. Sumiyoshi	2012	2011-01-01	Investigational New Drugs	Background We investigated the safety, pharmacokinetics, tumor response, and immunological parameters of sorafenib plus interferon a-2a (IFN) in Japanese patients with advanced RCC. Patients and methods After 2 weeks of IFN-alone treatment, eligible patients received 28-day cycles of continuous sorafenib 200 mg (Cohort 1) or 400 mg (Cohorts 2 and 3) twice daily combined with intramuscular IFN 6 (…	2012442375	RCC	RP2D	Safety		0	1	p1	industry	multi	Japan	Asia	positive	acceptable	0	1	0	IFN-a2a						18		18	5		5	1					Unresectable or metastatic renal cell carcinoma	no	no	NULL	NULL	2011-01-01	9	1
5859	Sorafenib in patients with metastatic gastrointestinal stromal tumors who failed two or more prior tyrosine kinase inhibitors: A phase II study of Korean gastrointestinal stromal tumors study group	S. H. Park, M. H. Ryu, B. Y. Ryoo, S. A. Im, H. C. Kwon, S. S. Lee, S. R. Park, B. Y. Kang and Y. K. Kang	2012	2012-01-01	Investigational New Drugs	Purpose To evaluated the efficacy and safety of sorafenib in patients with advanced gastrointestinal stromal tumors (GIST) who failed to previous standard treatments. Experimental Design Thirty-one patients with measurable metastatic GIST who failed both imatinib and sunitinib were accrued. Sorafenib was administered orally at 400 mg twice daily until disease progression or development of intoler…	2013202259	GIST	DCR-24 weeks			1	0	p2	non-industry	multi	Korea South	Asia	positive	acceptable	1	0	0							31	31		4	4		1	1		1		Metastatic gastrointestinal stromal tumors	no	no	2009-12-01	2010-06-01	2009-12-01	24	0	0
5865	Phase III, randomized, double-blind, placebo-controlled trial of gemcitabine/cisplatin alone or with sorafenib for the first-line treatment of advanced, nonsquamous non-small-cell lung cancer	L. G. Paz-Ares, B. Biesma, D. Heigener, J. Von Pawel, T. Eisen, J. Bennouna, L. Zhang, M. Liao, Y. Sun, S. Gans, K. Syrigos, E. Le Marie, M. Gottfried, J. Vansteenkiste, V. Alberola, U. P. Strauss, E. Montegriffo, T. J. Ong and A. Santoro	2012	2012-07-01	Journal of Clinical Oncology	Purpose: This trial evaluated the efficacy and safety of sorafenib plus gemcitabine/cisplatin in chemotherapynaive patients with unresectable stage IIIB to IV nonsquamous non-small-cell lung cancer (NSCLC). Patients and Methods: Between February 2007 and March 2009, 904 patients were randomly assigned to daily sorafenib (400 mg twice a day) or matching placebo plus gemcitabine (1,250 mg/m<sup>2</…	2012520089	NSCLC	OS			0	1	p3	industry	multi	Spain	Europe	negative	na	0	1	1	Cisplatin + Gemcitabine		Cisplatin + Gemcitabine + Placebo				385		385	107		107	1					Advanced, Nonsquamous Non–Small-Cell Lung Cancer	yes	yes	2007-02-01	2009-03-01	2007-02-01	17.5	5
5926	Sorafenib for patients with advanced angiosarcoma: A phase ii trial from the french sarcoma group (GSF/GETO)	I. Ray-Coquard, A. Italiano, E. Bompas, A. le Cesne, Y. M. Robin, C. Chevreau, J. O. Bay, G. Bousquet, S. Piperno-Neumann, N. Isambert, L. Lemaitre, C. Fournier, E. Gauthier, O. Collard, D. Cupissol, S. Clisant, J. Y. Blay and N. Penel	2012	2012-01-01	Oncologist	Background. Angiosarcomas account for <2% of all soft tissue sarcomas. This subtype is one of the most aggressive forms of soft tissue sarcoma. The prognosis for angiosarcoma patients in the advanced phase remains poor with current cytotoxic agents (progression-free survival [PFS] time of ~4 months and overall survival [OS] time of ~8 months). We investigated the antitumor activity of sorafenib i…	2012112370	Soft tissue sarcoma	PFS-9			1	0	p2	non-industry	multi	France	Europe	negative	acceptable	1	0	0							36	36		5	5		1					Advanced angiosarcoma	no	no	2008-06-01	2009-06-01	2008-06-01	8	0	0
5940	AMG 386 in combination with sorafenib in patients with metastatic clear cell carcinoma of the kidney: A randomized, double-blind, placebo-controlled, phase 2 study	B. Rini, C. Szczylik, N. M. Tannir, P. Koralewski, P. Tomczak, A. Deptala, L. Y. Dirix, M. Fishman, R. Ramlau, A. Ravaud, W. Rogowski, K. Kracht, Y. N. Sun, M. B. Bass, M. Puhlmann and B. Escudier	2012	2012-06-01	Cancer	BACKGROUND: This study evaluated the tolerability and antitumor activity of AMG 386, a peptibody (a peptide Fc fusion) that neutralizes the interaction of angiopoietin-1 and angiopoietin-2 with Tie2 (tyrosine kinase with immunoglobulin-like and EGF-like domains 2), plus sorafenib in patients with clear cell metastatic renal cell carcinoma (mRCC) in a randomized controlled study. METHODS: Previous…	2012717862	RCC	PFS			0	1	p2	industry	multi	United States	N America	negative	acceptable	0	1	0	AMG 386	Placebo				1	101		101	38		38	1					Metastatic Clear Cell RCC	yes	yes	2007-05-01	2008-11-01	2007-05-01	33	1
5950	Safety and pharmacokinetics of ganitumab (AMG 479) combined with sorafenib, panitumumab, erlotinib, or gemcitabine in patients with advanced solid tumors	L. S. Rosen, I. Puzanov, G. Friberg, E. Chan, Y. C. Hwang, H. Deng, J. Gilbert, D. Mahalingam, I. McCaffery, S. A. Michael, A. C. Mita, M. M. Mita, M. Mulay, P. Shubhakar, M. Zhu and J. Sarantopoulos	2012	2012-04-01	Clinical Cancer Research	Purpose: This phase 1b dose-escalation study assessed safety, tolerability, and pharmacokinetics of ganitumab, a fully human monoclonal antibody against the insulin-like growth factor 1 (IGF1) receptor, combined with targeted agents or cytotoxic chemotherapy in patients with advanced solid tumors. Experimental Design: Patients with treatment-refractory advanced solid tumors were sequentially enro…	2012348972	Mixed	Safety			0	1	p1	non-industry	multi	United States	N America	positive	acceptable	0	1	1	Ganitumab		Ganitumab + Erlotinib	Ganitumab + Gemcitabine	Ganitumab + Panitumumab		13		13	1		1	1					pathologically or cytologically documented advanced solid tumors or renal cell carcinoma (sorafenib cohorts) refractory to at least 1 line of therapy or for which no standard or curative therapy was a	no	no	2006-12-01	2009-09-01	2006-12-01	15	0
5999	Feasibility study of intra-patient sorafenib dose-escalation or re-escalation in patients with previously treated advanced solid tumors	T. J. Semrad, C. Eddings, C. X. Pan, D. H. Lau, D. Gandara, L. Beckett and P. N. Lara Jr	2012	2011-10-01	Investigational New Drugs	Summary: Purpose To determine if intra-patient dose escalation of the multi-targeted kinase inhibitor sorafenib is feasible in patients with advanced pretreated solid malignancies. Methods An intra-patient dose escalation scheme starting at 400 mg BID was employed in this prospective trial. Doses were escalated to 600 mg BID for the second cycle and to 800 mg BID for the third cycle in the absenc…	2012620614	Mixed	Safety			1	0	p2	non-industry	not_stated	United States	N America	negative	unacceptable	1	0	0							34	34		0	0		1					Advanced solid tumors	no	no	2008-12-01	2009-10-01	2008-12-01	12	1	1
6003	Phase i trial of sorafenib in combination with 5-fluorouracil/leucovorin in advanced solid tumors	E. Shacham-Shmueli, R. Geva, A. Figer, S. Bulocinic, K. Nalbandyan, S. Shpigel, J. Atsmon and E. Brendel	2012	2012-01-01	Journal of Clinical Pharmacology	This dose escalation, uncontrolled phase I study evaluated the tolerability, pharmacokinetics (PK), and antitumor activity of oral sorafenib 100, 200, or 400 mg twice daily (bid, continuous regimen) in combination with 5-fluorouracil/leucovorin (5-FU/LCV, intravenous infusion or bolus) in patients with advanced, solid tumors. A total of 47 patients (median age 57 years; colon cancer, 55%; pancrea…	2012240171	Mixed	MTD	Safety		0	1	p1	industry	single	Israel	Asia	positive	acceptable	0	1	0	5-FU + Leucovorin						38		38	2		2	1					Colon, pancreas, breast, hepatoma, other	no	no	NULL	2007-01-01	2012-01-01	11	0
6022	Conventional transarterial chemoembolisation in combination with sorafenib for patients with hepatocellular carcinoma: A pilot study	W. Sieghart, M. Pinter, M. Reisegger, C. Muller, A. Ba-Ssalamah, J. Lammer and M. Peck-Radosavljevic	2012	2012-01-01	European Radiology	Objectives To investigate the safety of transarterial chemoembolisation (TACE) in combination with sorafenib in patients with hepatocellular carcinoma (HCC). Methods Patients with Child-Pugh A/B liver function, ECOG performance status 0-2 and HCC treatable with TACE received continuous sorafenib 800 mg/day, and TACE with doxorubicin (75, 50 and 25 mg/m<sup>2</sup> according to serum bilirubin: <1…	2012305007	HCC	Safety			0	1	p1	industry	not_stated	Austria	Europe	negative	unacceptable	0	1	0	Doxorubicin-TACE						15		15	7		7	1					HCC not suitable for surgery	no	no	2008-10-01	2010-06-01	2008-10-01	23	4
6095	A double-blind randomized discontinuation phase-ii study of sorafenib (BAY 43-9006) in previously treated non-small-cell lung cancer patients: Eastern cooperative oncology group study E2501	H. A. Wakelee, J. W. Lee, N. H. Hanna, A. M. Traynor, D. P. Carbone and J. H. Schiller	2012	2012-10-01	Journal of Thoracic Oncology	Introduction: Sorafenib is a raf kinase and angiogenesis inhibitor with activity in multiple cancers. This phase-II study in heavily pretreated non-small-cell lung cancer (NSCLC) patients (> 2 prior therapies) used a randomized discontinuation design. Methods: Patients received 400 mg of sorafenib orally twice daily for two cycles (2 months) (step 1). Responding patients on step 1 continued on so…	2012564152	NSCLC	DCR-2			1	0	p2	non-industry	multi	United States	N America	positive	acceptable	1	0	1			Placebo* (sequential/crossover)				299	299		11	11		1					advanced stage NSCLC with disease progression after having received at least two prior chemotherapy regimens	yes	yes	2004-05-01	2007-05-01	2004-05-01	9	8	8
6103	A phase I trial and pharmacokinetic study of sorafenib in children with refractory solid tumors or leukemias: A Children's Oncology Group Phase I Consortium report	B. C. Widemann, A. Kim, E. Fox, S. Baruchel, P. C. Adamson, A. M. Ingle, J. G. Bender, M. Burke, B. Weigel, D. Stempak, F. M. Balis and S. M. Blaney	2012	2012-09-01	Clinical Cancer Research	Purpose: To determine the dose-limiting toxicities (DLT), maximum tolerated dose (MTD), pharmacokinetics, and pharmacodynamics of sorafenib in children with refractory extracranial solid tumors and evaluate the tolerability of the solid tumor MTD in children with refractory leukemias. Experimental Design: Sorafenib was administered orally every 12 hours for consecutive 28-day cycles. Pharmacokine…	2012654374	Mixed	MTD	PK profile	Safety	1	0	p1	non-industry	multi	United States	N America	positive	acceptable	1	0	0							60	60		0	0		NON-SOLID					Refractory Osteosarcoma, Ewing's sarcoma, Alveolar rhabdomyosarcoma, Synovial sarcoma, Alveolar soft part sarcoma, MPNST, Other Sarcoma, Hepatoblastoma, Wilms tumor, Adrenocortical carcinoma, RCC, AML, ALL	no	no	2006-08-01	2010-02-01	2006-08-01	7	0	0
6191	Phase i pharmacokinetic and pharmacodynamic study of cetuximab, irinotecan and sorafenib in advanced colorectal cancer	N. Azad, A. Dasari, J. Arcaroli, G. E. Taylor, D. A. Laheru, M. A. Carducci, M. McManus, K. Quackenbush, J. J. Wright, M. Hidalgo, L. A. Diaz Jr, R. C. Donehower, M. Zhao, M. A. Rudek and W. A. Messersmith	2013	2012-05-01	Investigational New Drugs	Summary: Background This phase Ib study was designed to determine the maximum tolerated doses (MTD) and dose limiting toxicities (DLTs) of irinotecan and cetuximab with sorafenib. Secondary objectives included characterizing the pharmacokinetics and pharmacodynamics and evaluating preliminary antitumor activity in patients with advanced colorectal cancer (CRC). Methods Patients with metastatic, p…	2013407947	Colorectal	MTD	Safety		0	1	p1	non-industry	multi	United States	N America	positive	unacceptable	0	1	0	Cetuximab + Irinotecan						18		18	2		2	1					Advanced colorectal cancer	no	no	2006-08-01	2010-09-01	2006-08-01	9	0
6221	Comprehensive biomarker analysis and final efficacy results of sorafenib in the BATTLE trial	G. R. Blumenschein, Jr., P. Saintigny, S. Liu, E. S. Kim, A. S. Tsao, R. S. Herbst, C. Alden, J. J. Lee, X. Tang, D. J. Stewart, M. S. Kies, F. V. Fossella, H. T. Tran, L. Mao, M. E. Hicks, J. Erasmus, Jr., S. Gupta, L. Girard, M. Peyton, L. Diao, J. Wang, S. E. Davis, J. D. Minna, I. Wistuba, W. K. Hong, J. V. Heymach and S. M. Lippman	2013	2011-06-01	Clinical Cancer Research	PURPOSE: To report the clinical efficacy of sorafenib and to evaluate biomarkers associated with sorafenib clinical benefit in the BATTLE (Biomarker-Integrated Approaches of Targeted Therapy for Lung Cancer Elimination) program. PATIENTS AND METHODS: Patients with previously treated non-small cell lung cancer (NSCLC) received sorafenib until progression or unacceptable toxicity. Eight-week diseas…	24166906	NSCLC	DCR-8 weeks			1	0	p2	non-industry	single	United States	N America	positive	acceptable	1	0	1			Erlotinib	Vandetanib	Erlotinib + Bexarotene		98	98		2	2		1					Advanced NSCLC	yes	no	2006-11-01	2009-10-01	2006-11-01	8	0	0
6227	Could interferon still play a role in metastatic renal cell carcinoma? A randomized study of two schedules of sorafenib plus interferon-alpha 2a (RAPSODY)	S. Bracarda, C. Porta, C. Boni, A. Santoro, C. Mucciarini, A. Pazzola, E. Cortesi, D. Gasparro, R. Labianca, F. Di Costanzo, A. Falcone, M. Cinquini, C. Caserta, C. Paglino and V. De Angelis	2013	2012-08-01	European Urology	Background: Sorafenib has proven efficacy in metastatic renal cell carcinoma (mRCC). Interferon (IFN) has antiangiogenic activity that is thought to be both dose- and administration-schedule dependent. Objective: To compare two different schedules of IFN combined with sorafenib. Design, setting, and participants: Single-stage, prospective, noncomparative, randomized, open-label, multicenter, phas…	2013013100	RCC	PFS	Safety		0	1	p2	industry	multi	Italy	Europe	negative	acceptable	0	1	0	IFN-a2a						101		101	26		26	1					Metastatic clear cell RCC	yes	no	2006-01-01	2007-03-01	2006-01-01	39	0
6264	Sorafenib and bevacizumab combination targeted therapy in advanced neuroendocrine tumour: A phase II study of Spanish Neuroendocrine Tumour Group (GETNE0801)	D. Castellano, J. Capdevila, J. Sastre, V. Alonso, M. Llanos, R. Garcia-Carbonero, J. L. Manzano Mozo, I. Sevilla, I. Duran and R. Salazar	2013	2013-09-01	European Journal of Cancer	Background Sorafenib and bevacizumab as single agents have shown efficacy and acceptable toxicity in NETs phase II trials. Sorafenib and bevacizumab combination has shown manageable toxicity in phase I trials in solid tumours. The purpose of this study was to evaluate the safety and efficacy of the combination of sorafenib and bevacizumab in patients with advanced neuroendocrine tumours. Methods …	2013729539	NET	PFS-6			0	1	p2	industry	multi	Spain	Europe	positive	unacceptable	0	1	0	Bevacizumab						41		41	4		4	1					Moderately or well-differentiated, measurable metastatic NETs	no	no	2008-07-01	2009-04-01	2008-07-01	26	0
6274	Phase i study of sorafenib in combination with everolimus (RAD001) in patients with advanced neuroendocrine tumors	J. A. Chan, R. J. Mayer, N. Jackson, P. Malinowski, E. Regan and M. H. Kulke	2013	2013-03-01	Cancer Chemotherapy and Pharmacology	Purpose: Sorafenib and everolimus are both active against neuroendocrine tumors (NET). Because of potential synergy between VEGF pathway and mTOR inhibitors, we performed a phase I study to evaluate the safety and feasibility of combining sorafenib and everolimus in patients with advanced NET. Methods: Patients were treated with everolimus 10 mg daily in combination with sorafenib (dose level 1: …	2013316426	NET	MTD	Preliminary efficacy		0	1	p1	non-industry	multi	United States	N America	inconclusive	unacceptable	0	1	0	Everolimus						17		17	1		1	1					Advanced small bowel, bronchus, stomach, duodenum, thymus, unknown neuroendocrine	no	no	2009-07-01	2013-03-01	2009-07-01	16	1
6286	Sorafenib in patients with progressive epithelioid hemangioendothelioma: A phase 2 study by the French Sarcoma Group (GSF/GETO)	C. Chevreau, A. Le Cesne, I. Ray-Coquard, A. Italiano, A. Cioffi, N. Isambert, Y. M. Robin, C. Fournier, S. Clisant, L. Chaigneau, J. O. Bay, E. Bompas, E. Gauthier, J. Y. Blay and N. Penel	2013	2013-04-01	Cancer	BACKGROUND There is no standard treatment for progressive epithelioid hemangioendothelioma (EHE). To investigate the significant vascularization of EHE, the activity/toxicity of sorafenib in patients with progressive EHE was explored. METHODS In this multicenter, 1-stage, phase 2 trial of sorafenib (800 mg daily), the primary endpoint, which was chosen by default, was the 9-month progression-free…	2013416389	eHAE	PFS-9			1	0	p2	non-industry	multi	France	Europe	inconclusive	acceptable	1	0	0							13	13		2	2		1					Progressive Epithelioid Hemangioendothelioma	no	no	2009-06-01	2011-02-01	2009-06-01	18	0	0
6316	A phase i study of sorafenib and vorinostat in patients with advanced solid tumors with expanded cohorts in renal cell carcinoma and non-small cell lung cancer	A. Dasari, L. Gore, W. A. Messersmith, S. Diab, A. Jimeno, C. D. Weekes, K. D. Lewis, H. A. Drabkin, T. W. Flaig and D. R. Camidge	2013	2012-03-01	Investigational New Drugs	Summary: Background This phase I study evaluated the safety, tolerability and preliminary efficacy of sorafenib combined with vorinostat in patients with solid tumors. Patients and methods Patients were treated with sorafenib 400 mg po bid daily and vorinostat 200-400 mg po days 1-14 of a 21 day cycle to establish the recommended phase II dose (RP2D). The tolerability and efficacy of the RP2D was…	2013072387	Mixed	MTD			0	1	p1	industry	single	United States	N America	positive	unacceptable	0	1	0	Vorinostat						35		35	0		0	1					Advanced RCC, SNCLC, Mesothelioma, Sarcoma, Colorectal cancer	no	no	2008-04-01	2010-10-01	2008-04-01	9	1
6326	A phase i study of the combination of sorafenib with temozolomide and radiation therapy for the treatment of primary and recurrent high-grade gliomas	R. B. Den, M. Kamrava, Z. Sheng, M. Werner-Wasik, E. Dougherty, M. Marinucchi, Y. R. Lawrence, S. Hegarty, T. Hyslop, D. W. Andrews, J. Glass, D. P. Friedman, M. R. Green, K. Camphausen and A. P. Dicker	2013	2012-06-01	International Journal of Radiation Oncology Biology Physics	Purpose: Despite recent advances in the management of high-grade and recurrent gliomas, survival remains poor. Antiangiogenic therapy has been shown to be efficacious in the treatment of high-grade gliomas both in preclinical models and in clinical trials. We sought to determine the safety and maximum tolerated dose of sorafenib when combined with both radiation and temozolomide in the primary se…	2013030008	Glioma	MTD			0	1	p1	non-industry	not_stated	United States	N America	positive	acceptable	0	1	0	Temozolomide	Radiotherapy					18		18	5		5	1					Primary and Recurrent High-Grade Gliomas	no	no	2008-03-01	2009-07-01	2008-03-01	4	0
6341	A phase II study of sorafenib in patients with platinum-pretreated, advanced (Stage IIIb or IV) non-small cell lung cancer with a KRAS mutation	A. M. Dingemans, W. W. Mellema, H. J. Groen, A. van Wijk, S. A. Burgers, P. W. Kunst, E. Thunnissen, D. A. Heideman and E. F. Smit	2013	2012-12-01	Clinical Cancer Research	PURPOSE: Sorafenib inhibits the Ras/Raf pathway, which is overactive in cancer patients with a KRAS mutation. We hypothesized that patients with non-small cell lung cancer (NSCLC) with KRAS mutation will benefit from treatment with sorafenib. EXPERIMENTAL DESIGN: In this phase II study, patients with KRAS-mutated, stage IIIb or IV NSCLC that progressed after at least one platinum-containing regim…	23224737	NSCLC	DCR-6 weeks			1	0	p2	industry	multi	Netherlands	Europe	positive	acceptable	1	0	0							57	57		5	5		1					Non-Small Cell Lung Cancer with a KRAS Mutation	no	no	2010-05-01	2011-02-01	2010-05-01	6	0	0
6382	Phase i study investigating everolimus combined with sorafenib in patients with advanced hepatocellular carcinoma	R. S. Finn, R. T. P. Poon, T. Yau, H. J. Klumpen, L. T. Chen, Y. K. Kang, T. Y. Kim, C. Gomez-Martin, C. Rodriguez-Lope, T. Kunz, T. Paquet, U. Brandt, D. Sellami and J. Bruix	2013	2013-08-01	Journal of Hepatology	Background & Aims Sorafenib is the only therapy shown to improve overall survival in advanced hepatocellular carcinoma (HCC). Combination therapy targeting multiple signaling pathways may improve outcomes. This phase I study was designed to determine the maximum tolerated dose (MTD) of everolimus given with sorafenib 400 mg twice daily in patients with advanced HCC of Child-Pugh class A liver fun…	2013729133	HCC	MTD			0	1	p1	industry	multi	United States	N America	negative	acceptable	0	1	0	Everolimus						30		30	0		0	1					advanced HCC	no	no	2008-12-01	2011-06-01	2008-12-01	13	0
6388	Phase III trial of carboplatin and paclitaxel with or without sorafenib in metastatic melanoma	K. T. Flaherty, S. J. Lee, F. Zhao, L. M. Schuchter, L. Flaherty, R. Kefford, M. B. Atkins, P. Leming and J. M. Kirkwood	2013	2012-12-01	Journal of Clinical Oncology	Purpose: The primary objective of this study was to determine whether carboplatin, paclitaxel, and sorafenib (CPS) improve overall survival (OS) compared with carboplatin and paclitaxel (CP) in chemotherapynaive patients with metastatic melanoma. Patients and Methods: In this double-blind, randomized, placebo-controlled phase III study, all patients received carboplatin at area under the [concent…	2013087742	Melanoma	OS			0	1	p3	ns	multi	United States	N America	negative	na	0	1	1	Carboplatin + Paclitaxel		Carboplatin + Paclitaxel + Placebo				410		410	84		84	1					Chemotherapy- naive patients with metastatic melanoma	yes	yes	2005-06-01	2008-04-01	2005-06-01	15	9
6403	Phase II study of bevacizumab in combination with sorafenib in recurrent glioblastoma (N0776): A North Central Cancer Treatment Group Trial	E. Galanis, S. K. Anderson, J. M. Lafky, J. H. Uhm, C. Giannini, S. K. Kumar, T. K. Kimlinger, D. W. Northfelt, P. J. Flynn, K. A. Jaeckle, T. J. Kaufmann and J. C. Buckner	2013	2013-07-01	Clinical Cancer Research	Purpose: We hypothesized that vertical blockade of VEGF signaling by combining bevacizumab with sorafenib in patients with recurrent glioblastoma would result in a synergistic therapeutic effect. We also investigated whether VEGF, VEGFR2 and hypoxia-inducible factor-1alpha single-nucleotide polymorphisms (SNP), circulating biomarkers of angiogenesis, and MRI markers such as apparent diffusion coe…	2013558644	Glioma	PFS-6			0	1	p2	non-industry	multi	United States	N America	negative	unacceptable	0	1	0	Bevacizumab						54		54	10		10	1					Recurrent glioblastoma	no	no	2008-09-01	2010-10-01	2008-09-01	26	0
6433	A double-blind, randomised, placebo-controlled, phase 2b study evaluating sorafenib in combination with paclitaxel as a first-line therapy in patients with HER2-negative advanced breast cancer	W. J. Gradishar, V. Kaklamani, T. P. Sahoo, D. Lokanatha, V. Raina, S. Bondarde, M. Jain, S. K. Ro, N. A. Lokker and L. Schwartzberg	2013	2012-09-01	European Journal of Cancer	Background: We conducted a phase 2b, randomised, double-blind, placebo-controlled screening trial to evaluate the addition of the multikinase inhibitor sorafenib (antiproliferative/antiangiogenic) to first-line paclitaxel for human epidermal growth factor receptor 2 (HER2)-negative locally recurrent/metastatic breast cancer. Methods: Patients were randomised to paclitaxel (90 mg/m<sup>2</sup>, we…	0	Breast	PFS			0	1	p2	non-industry	multi	United States	N America	negative	acceptable	0	1	1	Paclitaxel		Paclitaxel + Placebo				119		119	80		80	1					HER2-negative advanced breast cancer	yes	yes	2007-06-01	2009-01-01	2007-06-01	28	2
6435	A phase II study of sorafenib (BAY 43-9006) in recurrent diffuse large B cell lymphoma: An eastern cooperative oncology group study (E1404)	D. R. Greenwald, H. Li, S. M. Luger, R. S. Go, D. King, T. Patel, R. D. Gascoyne, J. Kolesar, B. S. Kahl and S. Horning	2013	2013-07-01	Journal of Hematology and Oncology	Patients with diffuse large B cell lymphoma (DLBCL) who are not candidates for or recur after autologous stem cell transplant have a poor overall prognosis. We conducted a phase II study of sorafenib (formerly BAY 43-9006) in the treatment of relapsed DLBCL. Fourteen patients were enrolled and assessed for response. Median number of cycles administered was 3 (range, 1-12). Common grade 3 toxiciti…	2013463738	Lymphoma	ORR			1	0	p2	non-industry	multi	United States	N America	negative	acceptable	1	0	0							14	14		0	0		NON-SOLID					Relapsed aggressive, recurrent Diffuse large B cell lymphoma (DLBCL)	no	no	2005-10-01	2006-12-01	2005-10-01	12	0	0
6448	Sorafenib and everolimus in advanced clear cell renal carcinoma: A phase I/II trial of the SCRI oncology research consortium	J. D. Hainsworth, D. M. Waterhouse, W. C. Penley, D. L. Shipley, D. S. Thompson, C. D. Webb and F. Anthony Greco	2013	2013-04-01	Cancer Investigation	Purpose: To evaluate the feasibility and efficacy of sorafenib and everolimus in renal cell carcinoma (RCC). Methods: Patients with advanced RCC and <1 previous targeted therapy were treated. Results: Maximum tolerated doses were sorafenib 200 mg PO BID, everolimus 35 mg PO once weekly. Dose-limiting toxicity was hand-foot syndrome. The response rate was 13%; median PFS was 5.45 months (95% CI: 3…	2013321171	RCC	PFS	MTD		0	1	p1-2	industry	multi	United States	N America	negative	acceptable	0	1	0	Everolimus						75		75	10		10	1					Metastatic or un-resectable locally recurrent renal cell carcinoma in which at least 75% of the cancer had clear cell histology	no	no	2007-01-01	2011-05-01	2007-01-01	19	1
6516	Temsirolimus combined with sorafenib in hepatocellular carcinoma: A phase I dose-finding trial with pharmacokinetic and biomarker correlates	R. K. Kelley Dr, H. S. Nimeiri, P. N. Munster, M. T. Vergo, Y. Huang, C. M. Li, J. Hwang, M. F. Mulcahy, B. M. Yeh, P. Kuhn, M. S. Luttgen, J. A. Grabowsky, L. Stucky-Marshall, W. M. Korn, A. H. Ko, E. K. Bergsland, I. A. B. Benson and A. P. Venook	2013	2013-03-01	Annals of Oncology	Background: Based upon preclinical evidence for improved antitumor activity in combination, this phase I study investigated the maximum-tolerated dose (MTD), safety, activity, pharmacokinetics (PK), and biomarkers of the mammalian target of rapamycin inhibitor, temsirolimus, combined with sorafenib in hepatocellular carcinoma (HCC). Patients and methods: Patients with incurable HCC and Child Pugh…	2013568752	HCC	MTD			0	1	p1	non-industry	multi	United States	N America	positive	acceptable	0	1	0	Temsirolimus						25		25	2		2	1					Stage II, III, or IV HCC not eligible for curative therapies	no	no	2009-12-01	2012-04-01	2009-12-01	12	1
6542	Phase 1 study of sorafenib in combination with bortezomib in patients with advanced malignancies	S. K. Kumar, J. Jett, R. Marks, R. Richardson, F. Quevedo, T. Moynihan, G. Croghan, S. N. Markovic, K. C. Bible, R. Qin, A. Tan, J. Molina, S. H. Kaufmann, C. Erlichman and A. A. Adjei	2013	2013-07-01	Investigational New Drugs	Background. Sorafenib (a VEGFR and multi-targeted kinase inhibitor) and Bortezomib (a proteasome inhibitor) have clinical antineoplastic activities as single agents, and combine synergistically in preclinical models. Methods. This Phase I study was undertaken to define the toxicity and the maximum tolerated doses (MTD) of the combination in patients with advanced solid tumors. Patients with cytol…	2013612547	Mixed	MTD			0	1	p1	non-industry	not_stated	United States	N America	positive	acceptable	0	1	0	Bortezomib						14		14	0		0	NON-SOLID					Advanced RCC, lung, pancreatic, breast, adrenal gland, multiple myeloma, CLL, spindle cell tumor, melanoma	no	no	2005-12-01	2008-09-01	2005-12-01	6	0
6561	A phase II study of gemcitabine and cisplatin plus sorafenib in patients with advanced biliary adenocarcinomas	J. K. Lee, M. Capanu, E. M. O'Reilly, J. Ma, J. F. Chou, J. Shia, S. S. Katz, B. Gansukh, D. Reidy-Lagunes, N. H. Segal, K. H. Yu, K. Y. Chung, L. B. Saltz and G. K. Abou-Alfa	2013	2013-07-01	British Journal of Cancer	Background: This study evaluated the addition of sorafenib to gemcitabine and cisplatin in biliary adenocarcinoma first-line therapy. Methods: Patients with advanced biliary adenocarcinomas received gemcitabine 1000 mg m-2 and cisplatin 25 mg m-2 on a 2 weeks on/1 week off cycle and sorafenib 400 mg twice daily. After the initial 16 patients were enrolled, the chemotherapy doses were amended in v…	2013539605	Biliary tract	PFS-6			0	1	p2	industry	single	United States	N America	negative	unacceptable	0	1	0	Cisplatin + Gemcitabine						33		33	4		4	1					Advanced, non-resectable, recurrent or metastatic biliary adenocarcinoma including intrahepatic cholangiocarcinoma, extrahepatic cholangiocarcinoma and gallbladder adenocarcinoma	no	no	2009-08-01	2010-12-01	2009-08-01	24	0
6580	A phase i study of sorafenib, oxaliplatin and 2 days of high dose capecitabine in advanced pancreatic and biliary tract cancer: A Wisconsin oncology network study	N. K. Loconte, K. D. Holen, W. R. Schelman, D. L. Mulkerin, D. A. Deming, H. R. Hernan, A. M. Traynor, T. Goggins, D. Groteluschen, K. Oettel, E. Robinson and S. J. Lubner	2013	2012-12-01	Investigational New Drugs	Summary: Chemotherapy has yielded minimal clinical benefit in pancreatic and biliary tract cancer. A high-dose, short course capecitabine schedule with oxaliplatin, has shown some efficacy with a lower incidence of palmar-plantar erythrodysesthesia. Achieving high exposures of the targeted agent sorafenib may be possible with this shorter schedule of capecitabine by avoiding dermatologic toxicity…	2013480383	Mixed	RP2D	DLT	Safety	0	1	p1	non-industry	multi	United States	N America	positive	acceptable	0	1	0	Capecitabine + Oxaliplatin						16		16	2		2	1					Advanced pancreatic and biliary tract cancer	no	no	2008-02-01	2010-07-01	2008-02-01	8	0
6588	A phase I/II study of sorafenib in combination with low dose cytarabine in elderly patients with acute myeloid leukemia or high-risk myelodysplastic syndrome from the National Cancer Institute of Canada Clinical Trials Group: Trial IND.186	D. A. Macdonald, S. E. Assouline, J. Brandwein, S. Kamel-Reid, E. A. Eisenhauer, S. Couban, S. Caplan, A. Foo, W. Walsh and B. Leber	2013	2012-11-01	Leukemia and Lymphoma	Sorafenib is active in patients with acute myeloid leukemia (AML) and myelodysplastic syndrome (MDS). The National Cancer Institute of Canada (NCIC) Clinical Trials Group initiated a phase I/II study of the combination of sorafenib with cytarabine in older patients with AML or high-risk MDS who were unsuitable for intensive chemotherapy. FLT3 mutational status was determined in all patients. Twen…	2013407531	Leukaemia	CR	RP2D		0	1	p1-2	non-industry	multi	Canada	N America	negative	acceptable	0	1	0	Cytarabine						15		15	0		0	NON-SOLID					AML or high-risk MDS unsuitable for intensive chemotherapy	no	no	2007-07-01	2010-03-01	2007-07-01	10	0
6600	Phase II trial of sequential subcutaneous interleukin-2 plus interferon alpha followed by sorafenib in renal cell carcinoma (RCC)	J. P. Maroto, X. G. Del Muro, B. Mellado, J. L. Perez-Gracia, R. Andres, J. Cruz, E. Gallardo, M. Domenech, J. A. Arranz and J. A. Meana	2013	2013-01-01	Clinical and Translational Oncology	Purpose: Immunotherapy (IL-2 and INF-alpha) was the treatment of choice for advanced renal cell carcinoma (RCC) until antiangiogenic therapy with tyrosin kinase inhibitors was developed in the early 2000s. This clinical trial explored the efficacy and toxicity of sequential treatment of IL-2 plus INF-alpha followed by sorafenib. Methods: Eligibility criteria included measurable, non-resectable, h…	2013547843	RCC	PFS			0	1	p2	industry	multi	Spain	Europe	positive	acceptable	0	1	0	IFN-a2a + IL-2 + Immunotherapy						36		36	12		12	1	1		1		Predominantly clear cell RCC	no	no	2006-06-01	2007-07-01	2006-06-01	36	0
6605	Multicenter phase II study of oxaliplatin and sorafenib in advanced gastric adenocarcinoma after failure of cisplatin and fluoropyrimidine treatment. A gemcad study	M. Martin-Richard, R. Gallego, C. Pericay, J. G. Foncillas, B. Queralt, E. Casado, J. Barriuso, V. Iranzo, I. Juez, L. Visa, E. Saigi, A. Barnadas, X. Garcia-Albeniz and J. Maurel	2013	2013-09-01	Investigational New Drugs	Background Cisplatin and fluoropyrimidine (CF) are standard first- line treatment in advanced gastric cancer, but no second-line treatment has yet been established. We present a phase II study in which we evaluated the efficacy and toxicity of the combination of Sorafenib (S), and Oxaliplatin as second-line therapy. Methods Patients with progressive gastric adenocarcinoma after CF- first-line, EC…	2013756731	Gastric	PFS			0	1	p2	ns	multi	Spain	Europe	negative	acceptable	0	1	0	Oxaliplatin						36		36	1		1	1	1			1	Adenocarcinoma of the gastro esophageal junction or stomach	no	no	2009-01-01	2011-08-01	2009-01-01	12	0
6617	Phase i trial of preoperative chemoradiation plus sorafenib for high-risk extremity soft tissue sarcomas with dynamic contrast-enhanced MRI correlates	J. M. Meyer, K. S. Perlewitz, J. B. Hayden, Y. C. Doung, A. Y. Hung, J. T. Vetto, R. F. Pommier, A. Mansoor, B. R. Beckett, A. Tudorica, M. Mori, M. L. Holtorf, A. Afzal, W. J. Woodward, E. T. Rodler, R. L. Jones, W. Huang and C. W. Ryan	2013	2013-10-01	Clinical Cancer Research	Purpose: We conducted a phase I trial of the addition of sorafenib to a chemoradiotherapy regimen in patients with high-risk (intermediate/high grade, >5 cm) extremity soft tissue sarcoma undergoing limb salvage surgery. We conducted a correlative study of quantitative dynamic contrast-enhanced MRI (DCE-MRI) to assess response to treatment. Experimental Design: Patients were treated at increasing…	2013809822	Soft tissue sarcoma	MTD			0	1	p1	non-industry	not_stated	United States	N America	positive	acceptable	0	1	0	Epirubicin + Ifosfamide	Radiotherapy					16		16	1		1	1					High-Risk Extremity Soft Tissue Sarcomas; Pleomorphic/NOS, Synovial, Liposarcoma, Leiomyosarcoma	no	no	2009-09-01	2011-07-01	2009-09-01	20	0
6621	A phase II study of combined VEGF inhibitor (bevacizumab+sorafenib) in patients with metastatic breast cancer: Hoosier Oncology Group Study BRE06-109	L. A. Mina, M. Yu, C. Johnson, C. Burkhardt, K. D. Miller and R. Zon	2013	2013-06-01	Investigational New Drugs	Purpose: Angiogenesis plays an essential role in tumor development, invasion and metastasis. We evaluated the efficacy and safety of dual angiogenesis blockade with bevacizumab and sorafenib in patients with metastatic breast cancer. Patients and Methods: Patients who had received no more than 2 prior chemotherapy regimens in any setting were treated with sorafenib 200 mg as a single oral dose da…	2013612571	Breast	PFS			0	1	p2	non-industry	multi	United States	N America	negative	unacceptable	0	1	0	Bevacizumab						18		18	0		0	1					Metastatic breast cancer	no	no	2007-10-01	2009-03-01	2007-10-01	12	0
6650	Phase I and clinical pharmacology study of bevacizumab, sorafenib, and low-dose cyclophosphamide in children and young adults with refractory/recurrent solid tumors	F. Navid, S. D. Baker, M. B. McCarville, C. F. Stewart, C. A. Billups, J. Wu, A. M. Davidoff, S. L. Spunt, W. L. Furman, L. M. McGregor, S. Hu, J. C. Panetta, D. Turner, D. Fofana, W. E. Reddick, W. Leung and V. M. Santana	2013	2012-11-01	Clinical Cancer Research	Purpose: To determine the maximum-tolerated dose (MTD), dose-limiting toxicities (DLT), pharmacokinetics, and pharmacodynamics of sorafenib, bevacizumab, and low-dose oral cyclophosphamide in children and young adults with recurrent/refractory solid tumors. Experimental Design: Sorafenib dose was escalated from 90 to 110mg/m<sup>2</sup> twice daily with fixed doses of bevacizumab at 5 mg/kg every…	0	Mixed	MTD	PK	PD	0	1	p1	non-industry	single	United States	N America	positive	acceptable	0	1	0	Bevacizumab + Cyclophosphamide						17		17	3		3	1					Refractory/Recurrent Rhabdoid tumor, Neuroblastoma, Osteosarcoma, Rhabdomyosarcoma, Synovial sarcoma	no	no	NULL	NULL	2012-11-01	12	1
6672	Phase 2 study of sorafenib in malignant mesothelioma previously treated with platinum-containing chemotherapy	S. Papa, S. Popat, R. Shah, A. T. Prevost, R. Lal, B. McLennan, P. Cane, L. Lang-Lazdunski, Z. Viney, J. T. Dunn, S. Barrington, D. Landau and J. Spicer	2013	2013-06-01	Journal of Thoracic Oncology	Introduction: The incidence of mesothelioma is rising. First-line cisplatin and pemetrexed confers a survival benefit, with a median progression-free survival (PFS) of 5.7 months. Sorafenib inhibits tyrosine kinases, including receptors for vascular endothelial growth factor, which are implicated in mesothelioma pathogenesis by preclinical and clinical data. Methods: Sorafenib, at 400 mg twice da…	0	Mesothelioma	PFS-6			1	0	p2	non-industry	multi	United Kingdom	Europe	inconclusive	acceptable	1	0	0							53	53		3	3		1					malignant pleural mesothelioma	no	no	2008-11-01	2011-04-01	2008-11-01	26	0	0
6682	NABTT 0502: A phase II and pharmacokinetic study of erlotinib and sorafenib for patients with progressive or recurrent glioblastoma multiforme	D. M. Peereboom, M. S. Ahluwalia, X. Ye, J. G. Supko, S. L. Hilderbrand, S. Phuphanich, L. B. Nabors, M. R. Rosenfeld, T. Mikkelsen and S. A. Grossman	2013	2013-01-01	Neuro-Oncology	Background. The signal transduction pathways of epidermal growth factor receptor and Ras are both important in the growth of glioblastoma multiforme (GBM). We hypothesized that inhibition of both pathways would improve the survival time of patients with recurrent GBM. Methods. Patients with recurrent/progressive GBM with 0-2 prior chemotherapy regimens received erlotinib 150 mg once daily and sor…	2013213308	Glioma	OS			0	1	p2	non-industry	not_stated	United States	N America	negative	acceptable	0	1	0	Erlotinib						56		56	0		0	1					progressive or recurrent glioblastoma multiforme	no	no	2007-01-01	2007-10-01	2007-01-01	8	0
6693	Sorafenib in patients with child-pugh class A and B advanced hepatocellular carcinoma: A prospective feasibility analysis	T. Pressiani, C. Boni, L. Rimassa, R. Labianca, S. Fagiuoli, S. Salvagni, D. Ferrari, E. Cortesi, C. Porta, C. Mucciarini, L. Latini, C. Carnaghi, M. Banzi, S. Fanello, M. De Giorgio, F. R. Lutman, G. Torzilli, M. A. Tommasini, R. Ceriani, G. Covini, M. C. Tronconi, L. Giordano, N. Locopo, S. Naimo and A. Santoro	2013	2012-10-01	Annals of Oncology	Background: Sorafenib has shown survival benefits in patients with advanced hepatocellular carcinoma (HCC) and Child-Pugh (CP) class A liver function. There are few prospective data on sorafenib in patients with HCC and CP class B. Patients and methods: A consecutive prospective series of 300 patients with CP class A or B HCC were enrolled in a dual-phase trial to determine survival and safety da…	2013075135	HCC	OS	PFS	TTP	1	0	p2	industry	multi	Italy	Europe	inconclusive	na	1	0	0							297			0			NO-ORR	1	1			cyto-histologically confirmed advanced HCC unsuitable for resection or loco-regional therapy, Barcelona Clinic Liver Cancer (BCLC)	no	no	2007-04-01	2008-07-01	2007-04-01	14.3	0	0
6711	Phase 2 study of azacytidine plus sorafenib in patients with acute myeloid leukemia and FLT-3 internal tandem duplication mutation	F. Ravandi, M. L. Alattar, M. R. Grunwald, M. A. Rudek, T. Rajkhowa, M. A. Richie, S. Pierce, N. Daver, G. Garcia-Manero, S. Faderl, A. Nazha, M. Konopleva, G. Borthakur, J. Burger, T. Kadia, S. Dellasala, M. Andreeff, J. Cortes, H. Kantarjian and M. Levis	2013	2013-04-01	Blood	Patients received 5-azacytidine (AZA) 75 mg/m(2) intravenously daily for 7 days and sorafenib 400 mg orally twice daily continuously; cycles were repeated at ~1-month intervals. Forty-three acute myeloid leukemia (AML) patients with a median age of 64 years (range, 24-87 years) were enrolled; 37 were evaluable for response. FMS-like tyrosine kinase-3 (FLT3)-internal tandem duplication (ITD) mutat…	23613521	Leukaemia	CR/PR, leukemia	Safety		0	1	p1-2	non-industry	single	United States	N America	positive	acceptable	0	1	0	Azacytidine						37		37	0		0	NON-SOLID	1		1		Acute myeloid leukemia and FLT-3 internal tandem duplication mutation	no	no	2011-01-01	2012-09-01	2011-01-01	12	0
6743	Phase ii prospective study with sorafenib in advanced soft tissue sarcomas after anthracycline-based therapy	A. Santoro, A. Comandone, U. Basso, H. Soto Parra, R. De Sanctis, E. Stroppa, I. Marcon, L. Giordano, F. R. Lutman, A. Boglione and A. Bertuzzi	2013	2012-12-01	Annals of Oncology	Introduction: We investigated the activity and safety of sorafenib, a multitargeted tyrosine-kinase inhibitor, in patients with advanced soft tissue sarcomas (STS). Patients and methods: An open-label nonrandomised multicentre phase II study was conducted in advanced STS patients pre-treated with anthracycline-based chemotherapy. Patients received sorafenib 400 mg twice daily for 28 days. The pri…	2013208059	Soft tissue sarcoma	ORR	PFS	PFS-6	1	0	p2	industry	multi	Italy	Europe	negative	acceptable	1	0	0							76	76		11	11		1	1			1	Metastatic or advanced soft-tissue sarcoma	no	no	2006-11-01	2010-01-01	2006-11-01	26	0	0
6749	Phase II trial of sorafenib in patients with advanced anaplastic carcinoma of the thyroid	P. Savvides, G. Nagaiah, P. Lavertu, P. Fu, J. J. Wright, R. Chapman, J. Wasman, A. Dowlati and S. C. Remick	2013	2013-04-01	Thyroid	Background: Anaplastic thyroid cancer (ATC) is a rare but highly aggressive malignancy with a median survival of 3-5 months. The BRAF oncogene is mutated to its active form in up to 24% of ATC cases. Sorafenib is a tyrosine kinase inhibitor that acts on the RAF-1 serine/threonine kinase. In preclinical mouse models, sorafenib inhibits the growth of ATC xenografts and improves survival. No study o…	2013459957	Thyroid	ORR			1	0	p2	non-industry	multi	United States	N America	negative	acceptable	1	0	0							20	20		2	2		1	1			1	Advanced Anaplastic Carcinoma of the Thyroid	no	no	2005-06-01	2011-04-01	2005-06-01	8	0	0
6759	Sorafenib or placebo with either gemcitabine or capecitabine in patients with HER-2-negative advanced breast cancer that progressed during or after bevacizumab	L. S. Schwartzberg, K. W. Tauer, R. C. Hermann, G. Makari-Judson, C. Isaacs, J. T. Beck, V. Kaklamani, E. J. Stepanski, H. S. Rugo, W. Wang, K. Bell-McGuinn, J. J. Kirshner, P. Eisenberg, R. Emanuelson, M. Keaton, E. Levine, D. C. Medgyesy, R. Qamar, A. Starr, S. K. Ro, N. A. Lokker and C. A. Hudis	2013	2013-02-01	Clinical Cancer Research	Purpose: We assessed adding the multikinase inhibitor sorafenib to gemcitabine or capecitabine in patients with advanced breast cancer whose disease progressed during/after bevacizumab. Experimental Design: This double-blind, randomized, placebo-controlled phase IIb study (ClinicalTrials.gov NCT00493636) enrolled patients with locally advanced or metastatic human epidermal growth factor receptor …	2013326060	Breast	PFS			0	1	p2	industry	multi	United States	N America	positive	acceptable	0	1	1	Capecitabine	Gemcitabine	Capecitabine + Placebo	Gemcitabine + Placebo			81		81	16		16	1					Locally advanced or metastatic human epidermal growth factor receptor 2 (HER2)–negative breast cancer and prior bevacizumab treatment	yes	yes	2007-06-01	2010-08-01	2007-06-01	14	1
6767	Sorafenib in combination with intensive chemotherapy in elderly patients with acute myeloid leukemia: results from a randomized, placebo-controlled trial	H. Serve, U. Krug, R. Wagner, M. C. Sauerland, A. Heinecke, U. Brunnberg, M. Schaich, O. Ottmann, J. Duyster, H. Wandt, T. Fischer, A. Giagounidis, A. Neubauer, A. Reichle, W. Aulitzky, R. Noppeney, I. Blau, V. Kunzmann, R. Stuhlmann, A. Kramer, K. A. Kreuzer, C. Brandts, B. Steffen, C. Thiede, C. Muller-Tidow, G. Ehninger and W. E. Berdel	2013	2013-07-01	Journal of clinical oncology : official journal of the American Society of Clinical Oncology	The prognosis of elderly patients with acute myeloid leukemia (AML) is still dismal even with intensive chemotherapy. In this trial, we compared the antileukemic activity of standard induction and consolidation therapy with or without the addition of the kinase inhibitor sorafenib in elderly patients with AML. All patients received standard cytarabine and daunorubicin induction (7+3 regimen) and …	23897964	Leukaemia	EFS			0	1	p2	industry	multi	Germany	Europe	negative	unacceptable	0	1	1	Cytarabine + Daunorubicin		Cytarabine + Daunorubicin + Placebo				102		102	0		0	NON-SOLID					Elderly Patients With Acute Myeloid Leukemia	yes	yes	2006-09-01	2008-06-01	2006-09-01	3	0
6782	Phase i pharmacokinetic and pharmacodynamic study of lapatinib in combination with sorafenib in patients with advanced refractory solid tumors	M. Simonelli, P. A. Zucali, E. Lorenzi, L. Rubino, F. De Vincenzo, R. De Sanctis, M. Perrino, L. Mancini, L. Di Tommaso, L. Rimassa, G. Masci, M. Zuradelli, M. B. Suter, M. Bertossi, G. Fattuzzo, L. Giordano, M. G. Roncalli and A. Santoro	2013	2012-11-01	European Journal of Cancer	Background: The epidermal growth factor receptor (EGFR) and ERBB2 (HER2) pathways and vascular endothelial growth factor (VEGF)-dependent angiogenesis have a pivotal role in cancer pathogenesis and progression. Robust experimental evidence has shown that these pathways are functionally linked and implicated in acquired resistance to targeted therapies making them attractive candidates for joined …	2013157269	Mixed	ORR	RP2D	PD	0	1	p1	industry	single	Italy	Europe	positive	acceptable	0	1	0	Lapatinib						27		27	5		5	1					advanced, refractory solid tumours; mesothelioma, transitional cell, GBM	no	no	2009-11-01	2010-10-01	2009-11-01	12	0
6806	Sorafenib in combination with oxaliplatin, leucovorin, and fluorouracil (modified FOLFOX6) as first-line treatment of metastatic colorectal cancer: The RESPECT trial	J. Tabernero, R. Garcia-Carbonero, J. Cassidy, A. Sobrero, E. Van Cutsem, C. H. Kohne, S. Tejpar, O. Gladkov, I. Davidenko, R. Salazar, L. Vladimirova, S. Cheporov, O. Burdaeva, F. Rivera, L. Samuel, I. Bulavina, V. Potter, Y. L. Chang, N. A. Lokker and P. J. O'Dwyer	2013	2013-03-01	Clinical Cancer Research	Purpose: This randomized, double-blind, placebo-controlled, phase IIb study evaluated adding sorafenib to first-line modified FOLFOX6 (mFOLFOX6) for metastatic colorectal cancer (mCRC). Experimental Design: Patients were randomized to sorafenib (400 mg b.i.d.) or placebo, combined with mFOLFOX6 (oxaliplatin 85 mg/m<sup>2</sup>; levo-leucovorin 200 mg/m<sup>2</sup>; fluorouracil 400 mg/m<sup>2</su…	2013286388	Colorectal	PFS			0	1	p2	industry	multi	Spain	Europe	negative	na	0	1	1	Fluorouracil + Levo-Leucovorin + Oxaliplatin		Placebo + FOLFOX6				97		97	45		45	1					metastatic CRC	yes	yes	2009-03-01	2010-02-01	2009-03-01	32	2
6875	Phase ii study of sorafenib in combination with cisplatin and 5-fluorouracil to treat recurrent or metastatic nasopharyngeal carcinoma	C. Xue, Y. Huang, P. Y. Huang, Q. T. Yu, J. J. Pan, L. Z. Liu, X. Q. Song, S. J. Lin, J. X. Wu, J. W. Zhang, H. Y. Zhao, F. Xu, J. L. Liu, Z. H. Hu, L. P. Zhao, Y. Y. Zhao, X. Wu, J. Zhang, Y. X. Ma and L. Zhang	2013	2012-11-01	Annals of Oncology	Background: We aimed to investigate the efficacy and tolerability of sorafenib combined with cisplatin and 5-fluorouracil (5-FU) in patients with recurrent or metastatic nasopharyngeal carcinoma (NPC). Patients and methods: It was a Simon two-stage designed trial. Chemotherapy-naive patients with recurrent or metastatic disease were enrolled. The regimen was sorafenib 400 mg orally b.i.d., cispla…	2013208053	HNC	ORR			0	1	p2	non-industry	multi	China	Asia	positive	acceptable	0	1	0	5-FU + Cisplatin						54		54	42		42	1	1		1		Recurrent or metastatic nasopharyngeal carcinoma	no	no	2009-01-01	2011-05-01	2009-01-01	24	1
6883	Sorafenib in patients with refractory or recurrent multiple myeloma	A. Yordanova, D. Hose, K. Neben, M. Witzens-Harig, I. Gutgemann, M. S. Raab, T. Moehler, H. Goldschmidt and I. G. Schmidt-Wolf	2013	2013-03-01	Hematological Oncology	Sorafenib is a small molecular inhibitor of several tyrosine protein kinases, including vascular endothelial growth factor receptor, platelet-derived growth factor receptor and rapidly accelerated fibrosarcoma kinases, targeting signal transduction and angiogenic pathways. It is approved for the treatment of advanced renal cell carcinoma and hepatocellular carcinoma. The objectives of this prospe…	2013768247	Multiple myeloma	ORR	Safety		1	0	p2	non-industry	multi	Germany	Europe	inconclusive	acceptable	1	0	0							11	11		1	1		NON-SOLID					Refractory or recurrent multiple myeloma	no	no	2006-11-08	2008-08-01	2006-11-08	11	0	0
6911	Sorafenib plus daily low-dose temozolomide for relapsed glioblastoma: A phase ii study	F. Zustovich, L. Landi, G. Lombardi, C. Porta, L. Galli, A. Fontana, D. Amoroso, C. Galli, M. Andreuccetti, A. Falcone and V. Zagonel	2013	2013-08-01	Anticancer Research	Background: Bevacizumab has provided encouraging results in relapsed glioblastoma multiforme (GBM). Pre-clinical and clinical investigations also showed that continuous low-dose temozolomide has some antiangiogenic activity. Based on this evidence, a phase II trial was designed to investigate an oral regimen of sorafenib, an oral multikinase inhibitor, and metronomic temozolomide for relapsed GBM…	2013548383	Glioma	PFS-6			0	1	p2	industry	not_stated	Italy	Europe	positive	acceptable	0	1	0	Temozolomide						42		42	5		5	1	1	1	1		Relapsed glioblastoma	no	no	2008-07-01	2011-10-01	2008-07-01	26	0
6932	A phase I, dose-finding study of sorafenib in combination with gemcitabine and radiation therapy in patients with unresectable pancreatic adenocarcinoma: A Grupo Espanol Multidisciplinario en Cancer Digestivo (GEMCAD) study	J. Aparicio, C. Garcia-Mora, M. Martin, L. Petriz Ma, J. Feliu, E. Sanchez-Santos Ma, J. R. Ayuso, D. Fuster, C. Conill and J. Maurel	2014	2014-01-01	PLoS ONE	Purpose: Sorafenib, an oral inhibitor of B-raf, VEGFR2, and PDGFR2-beta, acts against pancreatic cancer in preclinical models. Due to the radio-sensitization activity of both sorafenib and gemcitabine, we designed a multicenter, phase I trial to evaluate the safety profile and the recommended dose of this combination used with concomitant radiation therapy. Methods: Patients with biopsy-proven, u…	2014237535	Pancreatic	RP2D	Safety		0	1	p1	industry	multi	Spain	Europe	positive	acceptable	0	1	0	Gemcitabine	Radiotherapy					12		12	2		2	1					Unresectable Pancreatic Adenocarcinoma	no	no	2007-12-01	2009-09-01	2007-12-01	5	0
6950	Sorafenib in radioactive iodine-refractory, locally advanced or metastatic differentiated thyroid cancer: a randomised, double-blind, phase 3 trial	M. S. Brose, C. M. Nutting, B. Jarzab, R. Elisei, S. Siena, L. Bastholt, C. de la Fouchardiere, F. Pacini, R. Paschke, Y. K. Shong, S. I. Sherman, J. W. Smit, J. Chung, C. Kappeler, C. Pena, I. Molnar, M. J. Schlumberger and D. investigators	2014	2014-04-01	Lancet	BACKGROUND: Patients with radioactive iodine ((131)I)-refractory locally advanced or metastatic differentiated thyroid cancer have a poor prognosis because of the absence of effective treatment options. In this study, we assessed the efficacy and safety of orally administered sorafenib in the treatment of patients with this type of cancer. METHODS: In this multicentre, randomised, double-blind, p…	24768112	Thyroid	PFS			1	0	p3	industry	multi	United States	N America	positive	acceptable	1	0	1			Placebo				196	196		24	24		1					Radioactive iodine-refractory, locally advanced or metastatic differentiated thyroid cancer	yes	yes	2009-11-01	2011-08-01	2009-11-01	37	1	1
6956	Phase i trial of neoadjuvant conformal radiotherapy plus sorafenib for patients with locally advanced soft tissue sarcoma of the extremity	R. J. Canter, D. Borys, A. Olusanya, C. S. Li, L. Y. Lee, R. D. Boutin, S. D. Christensen, R. M. Tamurian and A. M. Monjazeb	2014	2014-02-01	Annals of Surgical Oncology	Background: Despite effective local therapy with surgery and radiotherapy (RT), ~50 % of patients with high-grade soft tissue sarcoma (STS) will relapse and die of disease. Since experimental data suggest a significant synergistic effect when antiangiogenic targeted therapies such as sorafenib are combined with RT, we chose to evaluate preoperative combined modality sorafenib and conformal RT in …	2014258396	Soft tissue sarcoma	MTD	Safety		0	1	p1	non-industry	not_stated	United States	N America	positive	acceptable	0	1	0	Radiotherapy						8		8	1		1	1					Locally Advanced Soft Tissue Sarcoma of the extremity, Pleomorphic, Myxoid/round cell liposarcoma, Clear cell sarcoma, Myxofibrosarcoma, Myxoid liposarcoma, Well-differentiated liposarcoma	no	no	2009-07-01	2011-11-01	2009-07-01	9	0
6957	Phase II trial of sorafenib and erlotinib in advanced pancreatic cancer	D. B. Cardin, L. Goff, C. I. Li, Y. Shyr, C. Winkler, R. Devore, L. Schlabach, M. Holloway, P. McClanahan, K. Meyer, J. Grigorieva, J. Berlin and E. Chan	2014	2014-02-01	Cancer Medicine	This trial was designed to assess efficacy and safety of erlotinib with sorafenib in the treatment of patients with advanced pancreatic adenocarcinoma. An exploratory correlative study analyzing pretreatment serum samples using a multivariate protein mass spectrometry-based test (VeriStrat), previously shown to correlate with outcomes in lung cancer patients treated with erlotinib, was performed.…	2014380639	Pancreatic	PFS-8 weeks			0	1	p2	non-industry	not_stated	United States	N America	negative	acceptable	0	1	0	Erlotinib						36		36	0		0	1					Advanced pancreatic cancer	no	no	2008-10-01	2011-02-01	2008-10-01	8	1
6959	Sorafenib does not improve efficacy of chemotherapy in advanced pancreatic cancer: A GISCAD randomized phase II study	S. Cascinu, R. Berardi, A. Sobrero, P. Bidoli, R. Labianca, S. Siena, D. Ferrari, S. Barni, E. Aitini, V. Zagonel, F. Caprioni, F. Villa, S. Mosconi, L. Faloppi, G. Tonini, C. Boni, P. Conte, F. Di Costanzo and M. Cinquini	2014	2013-11-01	Digestive and Liver Disease	Background: The RAF-MEK-ERK pathway is commonly activated in pancreatic cancer because of a high frequency of KRAS-BRAF mutations. A phase II randomized trial was designed to investigate the activity of sorafenib in combination with chemotherapy in advanced pancreatic cancer. Methods: Locally advanced or metastatic pancreatic adenocarcinoma patients were randomized in a 1:1 ratio to receive cispl…	2014074413	Pancreatic	PFS			0	1	p2	industry	multi	Italy	Europe	negative	unacceptable	0	1	1	Cisplatin + Gemcitabine		Cisplatin + Gemcitabine				58		58	2		2	1					Locally advanced or metastatic pancreatic cancer	yes	no	2007-08-01	2009-08-01	2007-08-01	18	0
6966	Phase 2 study of combined sorafenib and radiation therapy in patients with advanced hepatocellular carcinoma	S. W. Chen, L. C. Lin, Y. C. Kuo, J. A. Liang, C. C. Kuo and J. F. Chiou	2014	2014-04-01	International Journal of Radiation Oncology Biology Physics	Purpose This phase 2 study evaluated the efficacy of radiation therapy (RT) with concurrent and sequential sorafenib therapy in patients with unresectable hepatocellular carcinoma (HCC). Methods and Materials Forty patients with unresectable HCC unfit for transarterial chemoembolization were treated with RT with concurrent and sequential sorafenib. Sorafenib was administered from the commencement…	2014207699	HCC	ORR	Safety		0	1	p2	industry	multi	Taiwan	Asia	positive	unacceptable	0	1	0	Radiotherapy						40		40	22		22	1					Unresectable, advanced HCC	no	no	2010-08-01	2013-09-01	2010-08-01	30	0
6969	Phase 1 pharmacogenetic and pharmacodynamic study of sorafenib with concurrent radiation therapy and gemcitabine in locally advanced unresectable pancreatic cancer	E. G. Chiorean, B. P. Schneider, F. M. Akisik, S. M. Perkins, S. Anderson, C. S. Johnson, J. Dewitt, P. Helft, R. Clark, E. L. Johnston, A. J. Spittler, J. Deluca, G. Bu, S. Shahda, P. J. Loehrer, K. Sandrasegaran and H. R. Cardenes	2014	2014-04-01	International Journal of Radiation Oncology Biology Physics	Purpose To define the safety, efficacy, and pharmacogenetic and pharmacodynamic effects of sorafenib with gemcitabine-based chemoradiotherapy (CRT) in locally advanced pancreatic cancer. Methods and Materials Patients received gemcitabine 1000 mg/m<sup>2</sup> intravenously weekly x 3 every 4 weeks per cycle for 1 cycle before CRT and continued for up to 4 cycles after CRT. Weekly gemcitabine 600…	2014310325	Pancreatic	ORR	PFS	OS	0	1	p1	non-industry	single	United States	N America	inconclusive	unacceptable	0	1	0	Gemcitabine	Radiotherapy					27		27	8		8	1					Locally advanced pancreatic cancer	no	no	2006-11-01	2009-11-01	2006-11-01	12	1
6975	Multicenter phase II study of sequential radioembolization-sorafenib therapy for inoperable hepatocellular carcinoma	P. K. Chow, D. Y. Poon, M. W. Khin, H. Singh, H. S. Han, A. S. Goh, S. P. Choo, H. K. Lai, R. H. Lo, K. H. Tay, T. G. Lim, M. Gandhi, S. B. Tan, K. C. Soo and G. Asia-Pacific Hepatocellular Carcinoma Trials	2014	2014-03-01	PLoS ONE [Electronic Resource]	BACKGROUND: The safety and tolerability of sequential radioembolization-sorafenib therapy is unknown. An open-label, single arm, investigator-initiated Phase II study (NCT0071279) was conducted at four Asia-Pacific centers to evaluate the safety and efficacy of sequential radioembolization-sorafenib in patients with hepatocellular carcinoma (HCC) not amenable to curative therapies. METHODS: Soraf…	24614178	HCC	ORR			0	1	p2	non-industry	multi	Singapore	Asia	positive	acceptable	0	1	0	Radiotherapy						28		28	7		7	1					HCC not amenable to curative therapies	no	no	2008-06-01	2009-05-01	2008-06-01	20	1
7001	S0941: A phase 2 SWOG study of sorafenib and erlotinib in patients with advanced gallbladder carcinoma or cholangiocarcinoma	A. B. El-Khoueiry, C. Rankin, A. B. Siegel, S. Iqbal, I. Y. Gong, K. C. Micetich, O. R. Kayaleh, H. J. Lenz and C. D. Blanke	2014	2014-01-01	British Journal of Cancer	Background:Gallbladder cancers and cholangiocarcinomas make up a heterogenous group of tumours with a poor prognosis in advanced stages. On the basis of evidence of dysregulation of the epidermal growth factor receptor, vascular endothelial growth factor and mitogen-activated protein kinase pathways in biliary cancers, we performed a phase 2 trial of sorafenib and erlotinib in patients with advan…	2014132597	Biliary tract	PFS			0	1	p2	non-industry	not_stated	United States	N America	negative	na	0	1	0	Erlotinib						34		34	0		0	1					unresectable or metastatic gallbladder carcinoma or cholangiocarcinoma	no	no	2010-04-01	2011-03-01	2010-04-01	8	1
7025	Phase i clinical trial of lenalidomide in combination with sorafenib in patients with advanced cancer	P. Ganesan, S. Piha-Paul, A. Naing, G. Falchook, J. Wheler, S. Fu, D. S. Hong, R. Kurzrock, F. Janku, S. Laday, A. Y. Bedikian, M. Kies, R. A. Wolff and A. M. Tsimberidou	2014	2013-06-01	Investigational New Drugs	Background Preclinical data have shown that lenalidomide and sorafenib target endothelial cells, inhibiting growth of ocular melanoma cells in a xenograft model. We conducted a Phase I study of lenalidomide and sorafenib in patients with advanced cancer. Methods During the escalation phase, lenalidomide (days 1-21) and sorafenib (days 1-28) were given orally once daily at the following respective…	2014192831	Mixed	MTD	DLT		0	1	p1	industry	not_stated	United States	N America	positive	acceptable	0	1	0	Lenalidomide						38		38	0		0	1					Adenoid cystic carcinoma, Melanoma, Ovarian carcinoma, Colorectal carcinoma, NSCLC, HCC	no	no	2010-08-01	2012-09-01	2010-08-01	12	1
7041	Phase I study of combination chemotherapy using sorafenib and transcatheter arterial infusion with cisplatin for advanced hepatocellular carcinoma	A. Hagihara, M. Ikeda, H. Ueno, C. Morizane, S. Kondo, K. Nakachi, S. Mitsunaga, S. Shimizu, Y. Kojima, E. Suzuki, K. Katayama, K. Imanaka, C. Tamai, Y. Inaba, Y. Sato, M. Kato and T. Okusaka	2014	2014-02-01	Cancer Science	The aims of this study were to evaluate the frequency of dose-limiting toxicities and to find the recommended dose of combination chemotherapy with sorafenib and transcatheter arterial infusion (TAI) using cisplatin for patients with advanced hepatocellular carcinoma (HCC), for whom surgical resection, local ablation therapy, or transcatheter arterial chemoembolization were not indicated. Patient…	2014164825	HCC	RP2D	DLT		0	1	p1	non-industry	multi	Japan	Asia	positive	acceptable	0	1	0	Cisplatin						20		20	5		5	1					Advanced HCC for which surgical resection, local ablation therapy, and TACE were not indicated	no	no	2008-12-01	2010-08-01	2008-12-01	11.2	0
7055	A Phase I, open-label study of Trebananib combined with sorafenib or sunitinib in patients with advanced renal cell carcinoma	D. S. Hong, M. S. Gordon, W. E. Samlowski, R. Kurzrock, N. Tannir, D. Friedland, D. S. Mendelson, N. J. Vogelzang, E. Rasmussen, B. M. Wu, M. B. Bass, Z. D. Zhong, G. Friberg and L. J. Appleman	2014	2013-11-01	Clinical Genitourinary Cancer	Background Trebananib, an investigational peptibody, binds to angiopoietin 1 and 2, thereby blocking their interaction with Tie2. Patients and Methods This open-label phase I study examined trebananib 3 mg/kg or 10 mg/kg intravenous (I.V.) once weekly plus sorafenib 400 mg twice per day or sunitinib 50 mg once per day in advanced RCC. Primary end points were adverse event incidence and pharmacoki…	2014320307	RCC	PK profile	Safety		0	1	p1	industry	multi	United States	N America	positive	acceptable	0	1	1	Trebananib		Sunitinib + Trebananib				17		17	5		5	1					Advanced RCC	no	no	2006-09-01	2010-04-01	2006-09-01	40	0
7058	Phase i study of sorafenib combined with radiation therapy and temozolomide as first-line treatment of high-grade glioma	A. F. Hottinger, A. B. Aissa, V. Espeli, D. Squiban, N. Dunkel, M. I. Vargas, T. Hundsberger, H. N. Mac, K. Schaller, D. C. Weber, A. Bodmer and P. Y. Dietrich	2014	2014-05-01	British Journal of Cancer	Background:Sorafenib (Sb) is a multiple kinase inhibitor targeting both tumour cell proliferation and angiogenesis that may further act as a potent radiosensitizer by arresting cells in the most radiosensitive cell cycle phase. This phase I open-label, noncontrolled dose escalation study was performed to determine the safety and maximum tolerated dose (MTD) of Sb in combination with radiation the…	2014369320	Glioma	MTD	Safety		0	1	p1	industry	single	Switzerland	Europe	inconclusive	unacceptable	0	1	0	Temozolomide	Radiotherapy					15		15	2		2	1					WHO grade III or GBM glioma	no	no	2009-04-01	2011-03-01	2009-04-01	10	0
7094	Prospective randomized double-blind multicentre phase II study comparing gemcitabine and cisplatin plus sorafenib chemotherapy with gemcitabine and cisplatin plus placebo in locally advanced and/or metastasized urothelial cancer: SUSE (AUO-AB 31/05)	S. Krege, H. Rexer, F. Vom Dorp, P. De Geeter, T. Klotz, M. Retz, A. Heidenreich, M. Kuhn, J. Kamradt, S. Feyerabend, C. Wulfing, S. Zastrow, P. Albers, O. Hakenberg, J. Roigas, M. Fenner, H. Heinzer and M. Schrader	2014	2014-03-01	BJU International	Objective To evaluate the efficacy and safety of gemcitabine and cisplatin in combination with sorafenib, a tyrosine-kinase inhibitor, compared with chemotherapy alone as first-line treatment in advanced urothelial cancer. Patients and Methods The study was a randomized phase II trial. Its primary aim was to show an improvement in progression-free survival (PFS) of 4.5 months by adding sorafenib …	2014125515	Urothelial	PFS			0	1	p2	industry	multi	Germany	Europe	negative	acceptable	0	1	1	Cisplatin + Gemcitabine		Cisplatin + Gemcitabine + Placebo				40		40	21		21	1	1			1	Locally advanced (p)T3b,T4 and/or metastatic (N+/M+) TCC of the bladder or upper urinary tract with at least one measurable lesion	yes	yes	2006-10-01	2010-10-01	2006-10-01	12	0
7119	Sorafenib in the treatment of early breast cancer: Results of the neoadjuvant phase II study - SOFIA*	S. Loibl, D. Rokitta, B. Conrad, N. Harbeck, M. Wullner, M. Warm, K. Schwedler, B. Gerber, I. Schrader, H. Eidtmann, K. Mehta, U. Fuhr and G. Von Minckwitz	2014	2014-05-01	Breast Care	Background: Sorafenib was tested for neoadjuvant treatment with an anthracycline/taxane-based chemotherapy in the open-label, multicentre, single-arm phase II study, 'SOFIA'. Patients and Methods: Inclusion criteria were: HER2 negative, cT3, cT4 or cT2 cN+, M0 primary breast cancer. Patients received 4 x epirubicin 90 mg/m<sup>2</sup> and cyclophosphamide 600 mg/m<sup>2</sup> (EC) intravenously (…	2014489145	Breast	MTD			0	1	p2	industry	multi	Germany	Europe	positive	acceptable	0	1	0	Cyclophosphamide + Epirubicin + Paclitaxel						36		36	0		0	NO-ORR					HER2 negative, locally advanced disease with cT3–T4 or cT2, cN+, early breast cancer (Medium-to-high-risk primary HER2-negative breast cancer)	no	no	2007-11-01	2010-12-01	2007-11-01	23	0
7124	Phase I/II trial of vinorelbine and sorafenib in metastatic breast cancer	T. Luu, P. Frankel, C. Chung, W. Chow, J. Mortimer, A. Hurria and G. Somlo	2014	2013-10-01	Clinical Breast Cancer	Purpose We investigated the efficacy and toxicity of sorafenib, a multikinase inhibitor of vascular endothelial growth factor receptor tyrosine kinase, in combination with vinorelbine therapy in a phase I/II trial in patients with metastatic breast cancer. Patients and Methods We enrolled 11 patients in the phase I portion to determine the maximum tolerated dose (MTD) of the combination, followed…	2014193998	Breast	PFS-4	MTD	Safety	0	1	p1-2	industry	not_stated	United States	N America	negative	acceptable	0	1	0	Vinorelbine						41		41	4		4	1					measurable stage IV metastatic breast cancer	no	no	2009-02-01	2010-07-01	2009-02-01	16	0
7131	Phase II study evaluating the efficacy, safety, and pharmacodynamic correlative study of dual antiangiogenic inhibition using bevacizumab in combination with sorafenib in patients with advanced malignant melanoma	D. Mahalingam, L. Malik, M. Beeram, J. Rodon, K. Sankhala, A. Mita, D. Benjamin, N. Ketchum, J. Michalek, A. Tolcher, J. Wright and J. Sarantopoulos	2014	2014-05-01	Cancer Chemotherapy and Pharmacology	Purpose: Melanomas are vascular tumors with a high incidence of BRAF mutations driving tumor proliferation. Complete inhibition of vascular endothelial growth factor (VEGF) signaling has potential for enhanced antitumor efficacy. Methods: Patients with advanced melanoma and adequate organ function were eligible. Sorafenib was given orally at 200 mg BiD for 5 days every week; bevacizumab was admin…	2014451714	Melanoma	DCR-16 weeks			0	1	p2	non-industry	single	United States	N America	negative	unacceptable	0	1	0	Bevacizumab						14		14	0		0	1	1			1	Histologically confirmed diagnosis of stage IV metastatic melanoma	no	no	2006-08-01	2009-02-01	2006-08-01	16	0
7137	Phase i trial of sorafenib in combination with ifosfamide in patients with advanced sarcoma: A Spanish group for research on sarcomas (GEIS) study	J. Martin-Liberal, A. Lopez-Pousa, J. M. Broto, R. Cubedo, O. Gallego, E. Brendel, O. M. Tirado and X. G. Del Muro	2014	2013-06-01	Investigational New Drugs	Background This phase I trial assessed safety, pharmacokinetics (PK), dose limiting toxicity (DLT), maximum tolerated dose and recommended dose (RD) of the combination of sorafenib plus ifosfamide in patients with advanced sarcoma. Methods Twelve sarcoma patients (9 soft-tissue, 3 bone sarcoma) were treated with sorafenib plus ifosfamide (starting doses 200 mg bid and 6 g/m<sup>2</sup> respective…	2014192834	Sarcoma	MTD	Safety	PK profile	0	1	p1	industry	multi	United Kingdom	Europe	positive	acceptable	0	1	0	Ifosfamide						11		11	0		0	1					Advanced sarcoma; Liposarcoma, Leiomyosarcoma, Chondrosarcoma, Angiosarcoma, Hemangioperycitoma, Chordoma, Synovial sarcoma, Undifferentiated sarcoma	no	no	2007-10-01	2009-02-01	2007-10-01	18	0
7148	A phase i study of high-dose interleukin-2 with sorafenib in patients with metastatic renal cell carcinoma and melanoma	P. Monk, E. Lam, A. Mortazavi, K. Kendra, G. B. Lesinski, T. A. Mace, S. Geyer, W. E. Carson, S. Tahiri, A. Bhinder, S. K. Clinton and T. Olencki	2014	2014-04-01	Journal of Immunotherapy	This study was designed to evaluate the safety and feasibility of high-dose interleukin-2 (HD IL-2) followed by sorafenib in patients with metastatic melanoma (MM) and renal cell carcinoma (RCC). Biomarkers relevant to the antitumor effects of IL-2 that may be altered by sorafenib including the percentages of natural T-regulatory cells (Tregs), myeloid-derived suppressor cells (MDSC), and STAT5 p…	2014191457	Mixed	ORR	DLT		0	1	p1	industry	single	United States	N America	positive	acceptable	0	1	0	IL-2						17		17	3		3	1					Metastatic or unresectable RCC or MM with at least 1 measureable metastatic site	no	no	2006-12-01	2013-12-01	2006-12-01	12	0
7165	Efficacy and safety of sorafenib-gemcitabine combination therapy in advanced hepatocellular carcinoma: An open-label Phase II feasibility study	N. Naqi, S. Ahmad, S. Murad and J. Khattak	2014	2013-12-01	Hematology/ Oncology and Stem Cell Therapy	Purpose Sorafenib is considered a standard of care in advanced hepatocellular carcinoma (HCC). Its combination with gemcitabine, a pyrimidine analogue with limited friendly hepatic profile may prove beneficial in advanced HCC. The primary objective was to evaluate the efficacy and safety of a sorafenib and gemcitabine combination in patients with advanced HCC. Methods This was a non-randomized, o…	2014143183	HCC	ORR	Safety		0	1	p2	industry	multi	Pakistan	Asia	negative	unacceptable	0	1	0	Gemcitabine						18		18	2		2	1					Advanced HCC	no	no	2008-09-01	2009-12-01	2008-09-01	16	0
7183	A phase I/II study of S-1 with sorafenib in patients with advanced hepatocellular carcinoma	Y. Ooka, T. Chiba, S. Ogasawara, K. Arai, E. Suzuki, A. Tawada, T. Yamashita, F. Kanai, S. Kaneko and O. Yokosuka	2014	2014-03-01	Investigational New Drugs	Background: Sorafenib is the sole molecular-targeted agent showing a survival benefit in patients with advanced hepatocellular carcinoma (HCC). We evaluated the tolerability and effectiveness of a combination of S-1 with sorafenib in patients with advanced HCC. Methods: S-1 was administered during days 1-14 and sorafenib was administered every day. This treatment was repeated every 21 days. In ph…	2014483578	HCC	TTP	MTD		0	1	p1-2	ns	multi	Japan	Asia	inconclusive	unacceptable	0	1	0	S-1						26		26	1		1	1					Advanced HCC	no	no	2009-10-07	2013-09-01	2009-10-07	10	0
7230	Sorafenib and irinotecan (NEXIRI) as second- or later-line treatment for patients with metastatic colorectal cancer and KRAS-mutated tumours: A multicentre Phase I/II trial	E. Samalin, O. Bouche, S. Thezenas, E. Francois, A. Adenis, J. Bennouna, J. Taieb, F. Desseigne, J. F. Seitz, T. Conroy, M. P. Galais, E. Assenat, E. Crapez, S. Poujol, F. Bibeau, F. Boissiere, P. Laurent-Puig, M. Ychou and T. Mazard	2014	2014-01-01	British Journal of Cancer	Background:This trial evaluated the feasibility and efficacy of combined sorafenib and irinotecan (NEXIRI) as second- or later-line treatment of patients with KRAS-mutated metastatic colorectal cancer (mCRC), who had progressed after irinotecan-based chemotherapy.Methods:In Phase I, in a 3+3 dose escalation schedule, patients received irinotecan (125, 150 or 180 mg m<sup>-2</sup> every 2 weeks), …	2014168278	Colorectal	DCR	MTD		0	1	p1-2	industry	multi	France	Europe	positive	acceptable	0	1	0	Irinotecan						54		54	1		1	1					Histologically confirmed colorectal cancer with measurable unresectable metastatic lesions and documented DP after irinotecan-based chemotherapy and at least one line of chemotherapy	no	no	2009-02-01	2009-12-01	2009-02-01	16	0
7241	Randomized phase II trial of sorafenib alone or in combination with carboplatin/paclitaxel in women with recurrent platinum sensitive epithelial ovarian, peritoneal, or fallopian tube cancer	A. Schwandt, V. E. Von Gruenigen, R. M. Wenham, H. Frasure, S. Eaton, N. Fusco, P. Fu, J. J. Wright, A. Dowlati and S. Waggoner	2014	2014-03-01	Investigational New Drugs	Background/Purpose: This study was designed to evaluate the response and toxicity of sorafenib alone or when combined with carboplatin and paclitaxel in patients with platinum-sensitive, recurrent ovarian cancer, fallopian tube cancer, or primary peritoneal cancer (EOC). Methods: Patients with recurrent platinum-sensitive EOC with no more than 2 prior courses of chemotherapy were randomized to si…	2014483579	Ovarian/Peritoneal	ORR			1	1	p2	non-industry	multi	United States	N America	positive	unacceptable	1	1	0	Carboplatin + Paclitaxel					1	36	13	23	19	2	17	1	1			1	Papillary serous, Endometrioid, Transitional cell, Mixed – papillary serous and clear cell	yes	no	2004-01-01	2011-12-01	2004-01-01	22	0	0
7244	Phase II trial of Sorafenib in conjunction with chemotherapy and as maintenance therapy in extensive-stage small cell lung cancer	N. Sharma, N. Pennell, M. Nickolich, B. Halmos, P. Ma, T. Mekhail, P. Fu and A. Dowlati	2014	2014-01-01	Investigational New Drugs	Objectives Sorafenib is a multi-tyrosine kinase inhibitor of Raf kinase, VEGFR, and PDGFR. Angiogenesis is important for growth and progression of SCLC. This trial was conducted to evaluate whether the combination of cisplatin and etoposide plus concurrent and sequential sorafenib could prolong survival in patients with previously untreated SCLC. Methods Previously untreated patients with extensi…	2014192827	SCLC	OS-12			0	1	p2	ns	multi	United States	N America	negative	unacceptable	0	1	0	Cisplatin + Etoposide						17		17	8		8	1					Histologically or cytologically confirmed extensive-stage SCLC and no prior chemotherapy	no	no	2008-08-01	2011-11-01	2008-08-01	52	3
7258	Efficacy and safety of sorafenib in combination with gemcitabine in patients with advanced hepatocellular carcinoma: A multicenter, open-label, single-arm phase II study	V. Srimuninnimit, V. Sriuranpong and S. Suwanvecho	2014	2014-05-01	Asia-Pacific Journal of Clinical Oncology	AIMS: Currently, the only standard systemic treatment for advanced hepatocellular carcinoma is sorafenib monotherapy. The study was conducted to assess the efficacy and safety of the novel combination of sorafenib and gemcitabine in the treatment of advanced hepatocellular carcinoma. METHODS: Between March 2008 and October 2010, patients with advanced pathologically proven hepatocellular carcinom…	24810940	HCC	PFS			0	1	p2	industry	multi	Thailand	Asia	negative	acceptable	0	1	0	Gemcitabine						45		45	2		2	1					Advanced localized unresectable HCC with ineligibility for TACE, or progression after TACE, or HCC with extrahepatic spread	no	no	2008-03-01	2010-10-01	2008-03-01	32	0
7301	A phase i study of sorafenib in combination with S-1 plus cisplatin in patients with advanced gastric cancer	Y. Yamada, N. Kiyota, N. Fuse, K. Kato, H. Minami, K. Hashizume, Y. Kuroki, Y. Ito and A. Ohtsu	2014	2013-03-01	Gastric Cancer	Background: Sorafenib inhibits several receptor tyrosine kinases involved in tumor progression and angiogenesis. S-1, an oral fluorouracil antitumor drug, plus cisplatin (CDDP) is the standard regimen for advanced gastric adenocarcinoma (AGC) in Japan. The purpose of this phase I study was to evaluate the safety, pharmacokinetics, and preliminary efficacy of sorafenib in combination with S-1 plus…	2014010507	Gastric	PK profile	Safety		0	1	p1	industry	multi	Japan	Asia	positive	acceptable	0	1	0	Cisplatin + S-1						13		13	5		5	1					advanced, unresectable or recurrent gastric adenocarcinoma	no	no	2008-05-01	2009-01-01	2008-05-01	20	0
7866	Sorafenib and dacarbazine as first-line therapy for advanced melanoma: phase I and open-label phase II studies (phase 2)	T. Eisen, R. Marais, A. Affolter, P. Lorigan, C. Robert, P. Corrie, C. Ottensmeier, C. Chevreau, D. Chao, P. D. Nathan, T. Jouary, M. Harries, S. Negrier, E. Montegriffo, T. Ahmad, I. Gibbens, M. G. James, U. P. Strauss, S. Prendergast and M. E. Gore	2011	2011-07-01	British Journal of Cancer	METHOD: The safety of oral sorafenib up to a maximum protocol-specified dose combined with dacarbazine in patients with metastatic, histologically confirmed melanoma was investigated in a phase I dose-escalation study and the activity of the combination was explored in an open-label phase II study. RESULTS: In the phase I study, three patients were treated with sorafenib 200 mg twice daily (b.i.d…	21750549	Melanoma	ORR	MTD		0	1	p1-2	ns	multi	United Kingdom	Europe	negative	acceptable	0	1	0	Dacarbazine						101		101	13		13	1	32				Advanced melanoma	no	no	2004-04-01	2008-06-01	2004-04-01	6	1
[truncated: 16 more columns]

## Sheet: Figure 1
id	date_of_enrolment_all	cumulative ORR				cumulative g3-5 AE				orr_monotherapy	drug_n_monotherapy	g35_mono_sorafenib	received_sorafenib_mono
A) PHASE I MONOTHERAPY		ORR	Lower 95% CI	Upper 95% CI		SAE	Lower 95% CI	Upper 95% CI
792	2000-07-01	0.015	-0.014	0.045		0.087	0.02	0.153		1	66	6	69
684	2000-12-01	0.014	-0.008	0.036		0.091	0.037	0.144		0	41	4	41
693	2000-12-01	0.016	-0.005	0.036		0.096	0.05	0.143		1	32	5	44
724	2000-12-01	0.017	-0.003	0.036		0.103	0.058	0.148		0	19	4	19
804	2001-10-01					0.102	0.061	0.142			30	4	42
718	2002-05-24	0.019	0	0.038		0.11	0.071	0.149		2	29	7	31
717	2004-04-01	0.02	0.001	0.039		0.133	0.095	0.171		1	27	17	27
808	2004-12-01					0.129	0.094	0.164				5	47
783	2005-01-01	0.023	0.007	0.038		0.068	0.046	0.09		4	138	4	138
5258	2005-07-25					0.07	0.048	0.091			15	3	15
647	2005-08-01	0.023	0.008	0.037		0.072	0.051	0.093		1	48	6	53
747	2006-08-01					0.08	0.059	0.1				19	50
6103	2006-08-01					0.078	0.058	0.097			60	4	64
B) PHASE II MONOTHERAPY
764	2002-08-01	0.022	-0.003	0.046		0.102	0.051	0.153		3	137	14	137
696	2002-09-01	0.019	-0.001	0.039		0.108	0.062	0.154		0	37	5	37
787	2002-09-01	0.027	0.01	0.043		0.04	0.02	0.059		8	202	71	202
711	2003-11-01					0.042	0.022	0.061				4	21
772	2004-01-01	0.027	0.011	0.043		0.044	0.025	0.063		1	27	5	27
7241	2004-01-01	0.028	0.012	0.044		0.045	0.026	0.064		2	13	3	14
820	2004-01-01	0.031	0.015	0.046		0.047	0.029	0.065		5	64	4	64
686	2004-02-01	0.029	0.015	0.043		0.048	0.03	0.065		1	54	3	54
768	2004-04-01	0.025	0.012	0.037		0.05	0.033	0.067		0	51	5	52
6095	2004-05-01	0.028	0.017	0.038		0.067	0.052	0.083		11	299	54	333
681	2004-07-01	0.028	0.017	0.039		0.067	0.052	0.083		0	8	2	28
700	2004-08-01	0.025	0.015	0.035		0.067	0.052	0.082		0	55	3	55
725	2004-09-01	0.025	0.015	0.034		0.067	0.052	0.082		0	22	2	22
794	2004-10-01	0.025	0.015	0.034		0.067	0.053	0.082		1	41	3	41
799	2004-10-01	0.025	0.016	0.035		0.07	0.055	0.084		3	50	13	50
781	2004-10-01	0.026	0.017	0.035		0.073	0.059	0.087		2	59	14	71
778	2004-10-01	0.027	0.018	0.036		0.075	0.061	0.089		6	56	10	56
784	2004-11-01	0.027	0.018	0.036		0.074	0.06	0.088		0	20	1	23
760	2004-11-01	0.029	0.02	0.038		0.043	0.033	0.053		16	129	41	131
702	2004-12-01	0.03	0.021	0.039		0.044	0.034	0.054		3	25	5	25
753	2004-12-01	0.03	0.021	0.039		0.044	0.034	0.054		0	13	1	15
650	2005-01-01	0.03	0.021	0.039		0.045	0.035	0.055		2	34	6	37
745	2005-03-01	0.03	0.022	0.039		0.046	0.036	0.056		2	56	7	56
673	2005-06-01	0.031	0.023	0.04		0.047	0.037	0.057		12	40	10	40
773	2005-06-01	0.033	0.024	0.042		0.049	0.039	0.058		14	97	11	97
6749	2005-06-01	0.033	0.025	0.042		0.049	0.039	0.059		2	20	3	20
800	2005-07-01	0.031	0.023	0.039		0.049	0.039	0.059		1	83	23	83
817	2005-08-01	0.031	0.023	0.039		0.049	0.04	0.059		1	36	2	35
758	2005-08-01	0.031	0.023	0.039		0.05	0.04	0.059		0	14	4	17
5541	2005-10-01	0.03	0.023	0.038		0.05	0.041	0.06		0	25	5	31
6435	2005-10-01					0.051	0.041	0.06			14	5	14
780	2005-10-01	0.031	0.023	0.039		0.053	0.044	0.062		6	122	20	145
701	2005-10-01	0.031	0.023	0.039		0.054	0.044	0.063		0	22	5	27
5381	2005-12-01	0.032	0.025	0.04		0.056	0.047	0.066		21	44	30	44
775	2006-02-01	0.033	0.025	0.04		0.057	0.048	0.066		7	30	5	30
707	2006-03-01	0.032	0.024	0.039		0.058	0.048	0.067		0	37	6	37
694	2006-08-01	0.032	0.024	0.039		0.058	0.049	0.068		1	46	7	46
708	2006-11-01	0.032	0.025	0.039		0.059	0.05	0.069		4	51	10	51
6221	2006-11-01	0.031	0.024	0.038		0.061	0.052	0.07		2	98	17	105
6743	2006-11-01	0.032	0.025	0.039		0.061	0.052	0.07		11	76	7	100
779	2006-11-01	0.032	0.025	0.039		0.062	0.053	0.071		2	21	4	21
6883	2006-11-08					0.062	0.053	0.071			11	1	11
763	2007-01-01	0.032	0.025	0.039		0.063	0.054	0.071		1	34	8	34
819	2007-02-01	0.033	0.026	0.039		0.062	0.054	0.071		3	9	0	9
739	2007-02-23	0.033	0.026	0.04		0.064	0.055	0.072		7	34	15	34
6693	2007-04-01					0.043	0.036	0.05				44	297
741	2007-10-01	0.033	0.026	0.04		0.044	0.037	0.051		8	32	7	31
5606	2008-01-01	0.034	0.027	0.041		0.044	0.037	0.051		3	35	3	35
5616	2008-03-01					0.044	0.037	0.051			30	6	30
5926	2008-06-01	0.034	0.027	0.041		0.045	0.038	0.052		5	36	6	39
6672	2008-11-01	0.034	0.028	0.041		0.045	0.038	0.052		3	53	8	53
5999	2008-12-01	0.034	0.027	0.041		0.046	0.039	0.053		0	34	12	50
744	2008-12-01	0.034	0.027	0.041		0.046	0.039	0.053		0	11	1	11
6286	2009-06-01	0.034	0.027	0.041		0.046	0.039	0.053		2	13	3	15
5859	2009-12-01	0.034	0.028	0.041		0.046	0.04	0.053		4	31	5	31
5763	2009-12-30					0.046	0.039	0.053				0	13
6341	2010-05-01	0.035	0.028	0.041		0.047	0.04	0.053		5	57	4	57
C) PHASE III MONOTHERAPY
809	2003-11-01	0.098	0.07	0.125		0.06	0.038	0.082		44	451	27	451
810	2005-03-01	0.045	0.03	0.059		0.067	0.049	0.085		7	297	24	297
803	2005-09-01	0.042	0.029	0.055		0.071	0.055	0.088		5	149	16	149
6950	2009-11-01	0.048	0.036	0.061		0.083	0.067	0.099		24	196	43	207

## Sheet: Figure 2
id	date_of_enrolment_all	cumulative ORR				cumulative g3-5 AE				orr_combination_therapy	drug_n_combination_therapy	g35_combo_sorafenib	received_sorafenib_combo
A) PHASE I COMBINATION THERAPY		ORR	Lower 95% CI	Upper 95% CI		SAE	Lower 95% CI	Upper 95% CI
729	2002-05-01	0.256	0.119	0.393		0.795	0.668	0.922		10	39	31	39
733	2002-05-21	0.085	0.027	0.144		0.605	0.51	0.701		2	42	15	42
738	2002-10-28	0.058	0.017	0.099		0.557	0.474	0.64		1	33	14	34
795	2002-11-06					0.494	0.421	0.566				10	35
722	2004-02-01	0.05	0.016	0.084		0.414	0.351	0.478		1	31	5	31
728	2004-11-01	0.052	0.018	0.085		0.402	0.341	0.462		1	13	3	13
766	2004-11-01	0.061	0.028	0.093		0.387	0.331	0.444		7	37	12	39
734	2005-04-01	0.062	0.031	0.094		0.337	0.286	0.388		2	23	3	27
680	2005-06-01	0.066	0.035	0.097		0.329	0.28	0.378		4	14	3	15
710	2005-09-01	0.064	0.035	0.092		0.32	0.273	0.367		1	23	5	23
727	2005-09-01	0.066	0.038	0.095		0.414	0.37	0.458		3	15	16	17
735	2005-09-01	0.066	0.039	0.093		0.319	0.282	0.357		2	32	2	37
730	2005-11-01	0.066	0.041	0.092		0.307	0.272	0.343		3	43	10	50
6542	2005-12-01	0.064	0.039	0.088		0.301	0.267	0.336		0	14	2	14
685	2006-02-01	0.06	0.037	0.082		0.312	0.278	0.346		1	31	19	34
6191	2006-08-01	0.061	0.038	0.083		0.307	0.273	0.34		2	18	3	18
7055	2006-09-01	0.063	0.041	0.086		0.286	0.254	0.318		5	17	1	17
5769	2006-10-01	0.069	0.047	0.092		0.295	0.264	0.326		13	23	19	37
6969	2006-11-01	0.073	0.051	0.095		0.29	0.259	0.321		8	27	13	27
716	2006-11-07	0.075	0.053	0.097		0.27	0.24	0.299		3	12	15	19
5950	2006-12-01	0.075	0.053	0.097		0.269	0.24	0.298		1	13	3	13
7148	2006-12-01	0.076	0.055	0.098		0.274	0.245	0.303		3	17	10	17
5820	2007-01-01	0.075	0.054	0.097		0.272	0.243	0.3		0	10	3	17
5383	2007-01-01	0.078	0.056	0.099		0.268	0.24	0.296		6	15	2	15
811	2007-05-01					0.267	0.239	0.295				3	15
695	2007-07-01	0.075	0.055	0.096		0.267	0.239	0.294		0	14	5	19
805	2007-09-01	0.076	0.056	0.097		0.275	0.247	0.302		2	10	14	20
754	2007-10-01	0.08	0.06	0.101		0.283	0.256	0.31		10	16	15	21
5415	2007-10-01	0.083	0.062	0.103		0.281	0.255	0.308		7	19	4	20
7137	2007-10-01	0.082	0.061	0.102		0.283	0.256	0.309		0	11	5	12
6932	2007-12-01	0.082	0.062	0.102		0.277	0.251	0.303		2	12	1	12
712	2008-02-01	0.079	0.06	0.098		0.282	0.256	0.308		1	27	16	32
6580	2008-02-01	0.08	0.061	0.099		0.28	0.254	0.306		2	16	3	16
6326	2008-03-01	0.081	0.062	0.1		0.279	0.254	0.305		5	18	4	18
6316	2008-04-01	0.068	0.051	0.085		0.273	0.248	0.298		0	35	5	35
7301	2008-05-01	0.069	0.052	0.086		0.276	0.251	0.301		5	13	8	13
6022	2008-10-01	0.071	0.054	0.088		0.278	0.253	0.302		7	15	7	15
6382	2008-12-01	0.064	0.048	0.08		0.277	0.252	0.301		0	30	7	30
7041	2008-12-01	0.065	0.049	0.081		0.277	0.253	0.301		5	20	6	20
7058	2009-04-01	0.066	0.05	0.082		0.277	0.253	0.302		2	15	5	15
709	2009-04-01	0.066	0.05	0.082		0.278	0.254	0.302		1	14	5	14
726	2009-06-01	0.062	0.047	0.077		0.279	0.255	0.303		0	25	8	25
6274	2009-07-01	0.062	0.047	0.077		0.278	0.255	0.302		1	17	5	21
6956	2009-07-01	0.062	0.048	0.077		0.279	0.256	0.303		1	8	4	8
5733	2009-08-01	0.062	0.048	0.077		0.279	0.256	0.302		1	17	5	20
777	2009-09-01					0.282	0.259	0.305				8	12
756	2009-09-01	0.064	0.049	0.078		0.285	0.262	0.308		7	12	9	13
6617	2009-09-01	0.064	0.049	0.078		0.309	0.286	0.332		1	16	15	16
6782	2009-11-01	0.065	0.05	0.079		0.294	0.272	0.316		5	27	2	30
6516	2009-12-01	0.065	0.051	0.08		0.297	0.275	0.319		2	25	12	25
7025	2010-08-01	0.058	0.044	0.071		0.294	0.272	0.315		0	38	8	41
5830	2011-01-01	0.059	0.045	0.072		0.302	0.28	0.323		5	18	15	18
157	2011-03-01	0.054	0.042	0.067		0.301	0.28	0.322		0	34	9	34
705	2011-03-01	0.055	0.042	0.068		0.302	0.281	0.323		5	20	7	20
736	2012-01-01	0.056	0.043	0.068		0.319	0.299	0.34		3	25	24	27
6003	2012-01-01	0.056	0.043	0.068		0.313	0.292	0.333		2	38	7	47
6650	2012-11-01	0.056	0.044	0.068		0.318	0.298	0.339		3	17	15	19
B) PHASE II COMBINATION THERAPY
7241	2004-01-01	0.739	0.56	0.919		0.75	0.59	0.91		17	23	21	28
7866	2004-04-01	0.2	0.139	0.261		0.431	0.351	0.51		13	101	33	101
752	2004-09-01	0.125	0.081	0.169		0.391	0.323	0.46		2	43	12	43
755	2004-09-01	0.101	0.063	0.139		0.382	0.317	0.448		0	17	5	17
789	2004-09-01	0.113	0.077	0.148		0.364	0.307	0.421		12	62	19	62
774	2004-11-01	0.125	0.09	0.159		0.234	0.191	0.278		13	40	15	40
753	2004-12-01	0.095	0.066	0.124		0.226	0.185	0.266		1	37	6	37
759	2005-04-01	0.085	0.059	0.11		0.243	0.203	0.282		2	47	21	47
782	2005-04-01	0.092	0.067	0.117		0.252	0.214	0.289		12	51	18	51
855	2005-06-01	0.1	0.078	0.123		0.1	0.079	0.121		23	169	45	169
673	2005-06-01	0.104	0.082	0.127		0.106	0.085	0.127		10	40	18	39
692	2005-07-01	0.094	0.073	0.114		0.11	0.09	0.131		1	35	12	35
6227	2006-01-01	0.103	0.083	0.123		0.118	0.098	0.138		26	101	24	101
5426	2006-03-01	0.093	0.074	0.112		0.121	0.101	0.141		0	24	10	24
5726	2006-04-01	0.093	0.075	0.112		0.123	0.103	0.143		2	17	8	31
6600	2006-06-01	0.097	0.078	0.115		0.122	0.103	0.141		12	36	4	41
7131	2006-08-01	0.094	0.076	0.113		0.122	0.103	0.142		0	14	2	14
6767	2006-09-01	0.036	0.026	0.047		0.14	0.121	0.159		0	102	58	102
713	2006-10-01	0.036	0.025	0.046		0.142	0.123	0.161		1	39	10	39
699	2006-10-01	0.038	0.028	0.049		0.141	0.122	0.159		18	66	8	66
7094	2006-10-01	0.04	0.03	0.051		0.14	0.122	0.158		21	40	5	40
802	2006-12-01	0.042	0.032	0.053		0.143	0.125	0.161		20	40	12	40
6682	2007-01-01	0.037	0.028	0.047		0.14	0.123	0.157		0	56	5	56
5183	2007-01-01	0.039	0.03	0.049		0.135	0.119	0.152		23	41	12	47
6448	2007-01-01	0.041	0.031	0.05		0.137	0.121	0.154		10	75	14	78
793	2007-02-01	0.042	0.033	0.052		0.145	0.128	0.161		18	44	30	44
796	2007-04-01	0.043	0.033	0.052		0.145	0.129	0.161		4	53	8	53
5413	2007-04-01	0.043	0.033	0.052		0.147	0.131	0.163		0	14	14	39
5940	2007-05-01	0.046	0.037	0.055		0.064	0.054	0.075		38	101	20	101
6433	2007-06-01	0.054	0.044	0.063		0.063	0.053	0.074		80	119	38	115
6759	2007-06-01	0.055	0.046	0.064		0.067	0.057	0.077		16	81	40	79
697	2007-06-01	0.055	0.046	0.064		0.068	0.058	0.078		1	13	5	16
715	2007-07-01	0.056	0.047	0.065		0.068	0.058	0.078		5	50	6	50
6588	2007-07-01	0.055	0.046	0.065		0.079	0.069	0.088		0	15	20	21
714	2007-07-01	0.056	0.046	0.065		0.079	0.069	0.089		0	4	3	4
767	2007-08-01	0.059	0.05	0.068		0.083	0.073	0.092		44	115	44	112
6959	2007-08-01	0.058	0.049	0.067		0.084	0.074	0.094		2	58	12	58
683	2007-09-01	0.058	0.05	0.067		0.085	0.075	0.094		5	60	11	60
6621	2007-10-01	0.058	0.049	0.067		0.085	0.075	0.095		0	18	4	18
748	2007-10-01	0.058	0.05	0.067		0.084	0.074	0.094		6	18	0	18
798	2007-10-01	0.058	0.049	0.066		0.085	0.075	0.094		1	32	6	32
788	2007-10-01					0.084	0.075	0.094				5	61
746	2007-10-01	0.058	0.049	0.067		0.085	0.076	0.095		2	30	7	29
7119	2007-11-01	0.056	0.047	0.064		0.112	0.103	0.121		0	36	35	36
731	2007-12-01	0.057	0.048	0.065		0.113	0.104	0.123		14	50	22	50
682	2008-02-01	0.057	0.049	0.065		0.116	0.106	0.125		4	55	30	55
791	2008-02-01	0.058	0.049	0.066		0.108	0.099	0.117		9	111	17	111
7258	2008-03-01	0.057	0.049	0.065		0.109	0.1	0.118		2	45	15	45
732	2008-05-01	0.057	0.049	0.064		0.109	0.101	0.118		4	102	15	102
6975	2008-06-01	0.057	0.049	0.065		0.11	0.101	0.119		7	28	6	28
6911	2008-07-01	0.057	0.05	0.065		0.11	0.101	0.118		5	42	4	42
719	2008-07-01	0.059	0.051	0.067		0.11	0.101	0.119		18	104	13	104
6264	2008-07-01	0.059	0.051	0.067		0.11	0.102	0.119		4	41	7	44
7244	2008-08-01	0.059	0.052	0.067		0.112	0.103	0.12		8	17	14	17
6403	2008-09-01	0.06	0.052	0.068		0.113	0.104	0.121		10	54	13	54
7165	2008-09-01	0.06	0.053	0.068		0.113	0.104	0.121		2	18	6	30
6957	2008-10-01	0.058	0.051	0.066		0.113	0.105	0.122		0	36	6	36
5421	2008-11-01	0.058	0.051	0.066		0.113	0.105	0.122		0	9	3	10
6605	2009-01-01	0.058	0.05	0.065		0.114	0.105	0.122		1	36	7	40
6875	2009-01-01	0.061	0.054	0.069		0.114	0.106	0.123		42	54	12	54
7124	2009-02-01	0.061	0.054	0.069		0.115	0.107	0.124		4	41	16	46
7230	2009-02-01	0.06	0.052	0.067		0.117	0.108	0.125		1	54	25	64
6806	2009-03-01	0.062	0.054	0.069		0.119	0.111	0.128		45	97	49	97
785	2009-03-01	0.062	0.055	0.069		0.121	0.113	0.129		5	56	24	35
797	2009-07-01	0.063	0.056	0.07		0.122	0.114	0.131		22	50	21	50
6561	2009-08-01	0.063	0.056	0.071		0.123	0.115	0.132		4	33	20	37
7183	2009-10-07	0.063	0.056	0.07		0.124	0.115	0.132		1	26	10	45
7001	2010-04-01	0.061	0.054	0.069		0.124	0.116	0.132		0	34	6	34
6966	2010-08-01	0.062	0.055	0.07		0.124	0.116	0.133		22	40	9	40
6711	2011-01-01	0.061	0.054	0.068		0.124	0.116	0.132		0	37	3	43
C) PHASE III COMBINATION THERAPY
776	2005-05-01	0.119	0.065	0.174		0.507	0.423	0.592		16	134	68	134
6388	2005-06-01	0.176	0.144	0.208		0.51	0.468	0.553		84	410	201	393
790	2006-02-01	0.213	0.188	0.238		0.24	0.216	0.264		127	464	53	463
5600	2006-12-01	0.214	0.19	0.239		0.248	0.224	0.272		12	52	27	52
5865	2007-02-01	0.229	0.207	0.25		0.199	0.18	0.218		107	385	43	385

## Sheet: Figure 5
id	title	date_of_enrolment_all	date_of_closure_all	g5_sorafenib	g34_sorafenib	g35_sorafenib	received_sorafenib	cumulative_g35	cumulative_received_sorafenib
792	Phase I clinical and pharmacokinetic study of the Novel Raf kinase and vascular endothelial growth factor receptor inhibitor BAY 43-9006 in patients with advanced refractory solid tumors	2000-07-01	2003-02-01	0	6	6	69	6	69
684	Phase I study to determine the safety and pharmacokinetics of the novel Raf kinase and VEGFR inhibitor BAY 43-9006, administered for 28 days on/7 days off in patients with advanced, refractory solid tumors	2000-12-01	2003-01-01	0	4	4	41	10	110
693	Phase I safety and pharmacokinetics of BAY 43-9006 administered for 21 days on/7 days off in patients with advanced, refractory solid tumours	2000-12-01	2002-12-01	0	5	5	44	15	154
724	Safety and pharmacokinetics of the dual action Raf kinase and vascular endothelial growth factor receptor inhibitor, BAY 43-9006, in patients with advanced, refractory solid tumors	2000-12-01	NULL	0	4	4	19	19	173
804	A randomized phase I clinical and biologic study of two schedules of sorafenib in patients with myelodysplastic syndrome or acute myeloid leukemia: a NCIC (National Cancer Institute of Canada) Clinical Trials Group Study	2001-10-01	2004-04-01	1	3	4	42	23	215
729	A phase I trial of the oral, multikinase inhibitor sorafenib in combination with carboplatin and paclitaxel	2002-05-01	2007-11-01	0	31	31	39	54	254
733	Phase I trial of sorafenib and gemcitabine in advanced solid tumors with an expanded cohort in advanced pancreatic cancer	2002-05-21	2003-07-23	3	12	15	42	69	296
718	Phase I and pharmacokinetic study of sorafenib, an oral multikinase inhibitor, in Japanese patients with advanced refractory solid tumors	2002-05-24	2004-02-25	0	7	7	31	76	327
764	Phase II study of sorafenib in patients with advanced hepatocellular carcinoma	2002-08-01	2003-06-01	1	13	14	137	90	464
696	Sorafenib in advanced melanoma: a Phase II randomised discontinuation trial analysis	2002-09-01	NULL	0	5	5	37	95	501
787	Phase II placebo-controlled randomized discontinuation trial of sorafenib in patients with metastatic renal cell carcinoma	2002-09-01	2004-12-01	0	71	71	202	166	703
738	Results from an in vitro and a clinical/pharmacological phase I study with the combination irinotecan and sorafenib	2002-10-28	2004-06-04	0	14	14	34	180	737
795	Safety and pharmacokinetics of sorafenib combined with capecitabine in patients with advanced solid tumors: results of a phase 1 trial	2002-11-06	2005-06-29	0	10	10	35	190	772
711	Interaction of sorafenib and cytochrome P450 isoenzymes in patients with advanced melanoma: a phase I/II pharmacokinetic interaction study	2003-11-01	2008-12-01	0	4	4	21	194	793
809	Sorafenib in advanced clear-cell renal-cell carcinoma.[Erratum appears in N Engl J Med. 2007 Jul 12;357(2):203]	2003-11-01	2005-03-01	2	25	27	451	221	1244
772	Phase II trial of sorafenib in patients with recurrent or metastatic squamous cell carcinoma of the head and neck or nasopharyngeal carcinoma	2004-01-01	2006-01-01	0	5	5	27	226	1271
820	Safety and efficacy of sorafenib in patients with castrate resistant prostate cancer: a Phase II study	2004-01-01	2006-02-01	0	4	4	64	230	1335
7241	Randomized phase II trial of sorafenib alone or in combination with carboplatin/paclitaxel in women with recurrent platinum sensitive epithelial ovarian, peritoneal, or fallopian tube cancer	2004-01-01	2011-12-01	0	24	24	42	254	1377
686	Phase II multicenter, uncontrolled trial of sorafenib in patients with metastatic breast cancer	2004-02-01	2004-07-01	0	3	3	54	257	1431
722	Phase I trial of sorafenib in combination with gefitinib in patients with refractory or recurrent non-small cell lung cancer	2004-02-01	2004-12-01	0	5	5	31	262	1462
717	Phase I study of sorafenib in Japanese patients with hepatocellular carcinoma	2004-04-01	2005-01-01	0	17	17	27	279	1489
768	Phase II, multicenter, uncontrolled trial of single-agent sorafenib in patients with relapsed or refractory, advanced non-small-cell lung cancer	2004-04-01	2005-01-01	0	5	5	52	284	1541
7866	Sorafenib and dacarbazine as first-line therapy for advanced melanoma: phase I and open-label phase II studies (phase 2)	2004-04-01	2008-06-01	1	32	33	101	317	1642
6095	A double-blind randomized discontinuation phase-ii study of sorafenib (BAY 43-9006) in previously treated non-small-cell lung cancer patients: Eastern cooperative oncology group study E2501	2004-05-01	2007-05-01	8	46	54	333	371	1975
681	A phase II study of sorafenib in patients with chemo-naive castration-resistant prostate cancer	2004-07-01	2005-12-01	0	2	2	28	373	2003
700	A clinical phase II study with sorafenib in patients with progressive hormone-refractory prostate cancer: a study of the CESAR Central European Society for Anticancer Drug Research-EWIV	2004-08-01	2005-06-01	0	3	3	55	376	2058
725	A phase II clinical trial of sorafenib in androgen-independent prostate cancer	2004-09-01	2005-04-01	0	2	2	22	378	2080
752	Sorafenib in combination with gemcitabine in recurrent epithelial ovarian cancer: a study of the Princess Margaret Hospital Phase II Consortium	2004-09-01	2006-07-01	0	12	12	43	390	2123
755	Gemcitabine plus sorafenib in patients with advanced pancreatic cancer: a phase II trial of the University of Chicago Phase II Consortium	2004-09-01	2005-12-01	0	5	5	17	395	2140
789	Sorafenib with interferon alfa-2b as first-line treatment of advanced renal carcinoma: a phase II study of the Southwest Oncology Group	2004-09-01	2005-05-01	1	18	19	62	414	2202
778	Phase II trial of sorafenib in metastatic thyroid cancer	2004-10-01	2005-08-01	1	9	10	56	424	2258
781	Activity of sorafenib in recurrent ovarian cancer and primary peritoneal carcinomatosis: a gynecologic oncology group trial	2004-10-01	2007-09-01	0	14	14	71	438	2329
794	Phase II evaluation of sorafenib in advanced and metastatic squamous cell carcinoma of the head and neck: Southwest Oncology Group Study S0420	2004-10-01	2006-03-01	0	3	3	41	441	2370
799	A phase II study of sorafenib in malignant mesothelioma: results of Cancer and Leukemia Group B 30307	2004-10-01	2005-08-01	0	13	13	50	454	2420
728	Phase I trial of sorafenib in combination with IFN alpha-2a in patients with unresectable and/or metastatic renal cell carcinoma or malignant melanoma	2004-11-01	2005-03-01	0	3	3	13	457	2433
760	Phase II study to investigate the efficacy, safety, and pharmacokinetics of sorafenib in Japanese patients with advanced renal cell carcinoma	2004-11-01	2006-03-01	1	40	41	131	498	2564
766	Combination targeted therapy with sorafenib and bevacizumab results in enhanced toxicity and antitumor activity.[Erratum appears in J Clin Oncol. 2008 Sep 10;26(26):4363 Note: Figg, William D [added]]	2004-11-01	2007-09-01	0	12	12	39	510	2603
774	Phase II trial of sorafenib plus interferon alfa-2b as first- or second-line therapy in patients with metastatic renal cell cancer	2004-11-01	2006-10-01	0	15	15	40	525	2643
784	Phase II trial of sorafenib in patients with metastatic breast cancer previously exposed to anthracyclines or taxanes: North Central Cancer Treatment Group and Mayo Clinic Trial N0336	2004-11-01	2005-06-01	0	1	1	23	526	2666
702	A front-line window of opportunity phase 2 study of sorafenib in patients with advanced nonsmall cell lung cancer: North Central Cancer Treatment Group Study N0326	2004-12-01	2005-06-01	0	5	5	25	531	2691
753	A randomized phase II of gemcitabine and sorafenib versus sorafenib alone in patients with metastatic pancreatic cancer	2004-12-01	2007-03-01	0	7	7	52	538	2743
808	Phase I trial of sorafenib in patients with recurrent or progressive malignant glioma	2004-12-01	2010-10-01	0	5	5	47	543	2790
650	Evaluation of KRAS mutations, angiogenic biomarkers, and DCE-MRI in patients with advanced non-small-cell lung cancer receiving sorafenib	2005-01-01	2009-12-01	0	6	6	37	549	2827
783	Phase I and pharmacokinetic study of sorafenib in patients with hepatic or renal dysfunction: CALGB 60301	2005-01-01	2007-02-01	1	3	4	138	553	2965
745	A phase II study of sorafenib in advanced uterine carcinoma/carcinosarcoma: a trial of the Chicago, PMH, and California Phase II Consortia	2005-03-01	2007-08-01	0	7	7	56	560	3021
810	Sorafenib in advanced hepatocellular carcinoma	2005-03-01	2006-04-01	0	24	24	297	584	3318
734	Safety, efficacy, pharmacokinetics, and pharmacodynamics of the combination of sorafenib and tanespimycin	2005-04-01	2008-03-01	1	2	3	27	587	3345
759	Doxorubicin plus sorafenib vs doxorubicin alone in patients with advanced hepatocellular carcinoma: a randomized trial	2005-04-01	2006-10-01	3	18	21	47	608	3392
782	Double-blind randomized phase II study of the combination of sorafenib and dacarbazine in patients with advanced melanoma: a report from the 11715 Study Group	2005-04-01	2006-10-01	0	18	18	51	626	3443
776	Results of a phase III, randomized, placebo-controlled study of sorafenib in combination with carboplatin and paclitaxel as second-line treatment in patients with unresectable stage III or stage IV melanoma	2005-05-01	2006-05-01	4	64	68	134	694	3577
673	Upfront, randomized, phase 2 trial of sorafenib versus sorafenib and low-dose interferon alfa in patients with advanced renal cell carcinoma: clinical and biomarker analysis	2005-06-01	2007-06-01	0	28	28	79	722	3656
680	A phase I trial of sorafenib plus gemcitabine and capecitabine for patients with advanced renal cell carcinoma: New York Cancer Consortium Trial NCI 6981	2005-06-01	2007-08-01	0	3	3	15	725	3671
773	Randomized phase II trial of first-line treatment with sorafenib versus interferon Alfa-2a in patients with metastatic renal cell carcinoma.[Erratum appears in J Clin Oncol. 2009 May 1; 27(13):2305]	2005-06-01	2005-09-01	0	11	11	97	736	3768
855	Phase II Trial of Temozolomide and Sorafenib in Advanced Melanoma Patients with or without Brain Metastases	2005-06-01	2008-05-01	0	45	45	169	781	3937
6388	Phase III trial of carboplatin and paclitaxel with or without sorafenib in metastatic melanoma	2005-06-01	2008-04-01	9	192	201	393	982	4330
6749	Phase II trial of sorafenib in patients with advanced anaplastic carcinoma of the thyroid	2005-06-01	2011-04-01	0	3	3	20	985	4350
692	Phase I/II study of sorafenib with anastrozole in patients with hormone receptor positive aromatase inhibitor resistant metastatic breast cancer	2005-07-01	2009-05-01	0	12	12	35	997	4385
800	Sorafenib in platinum-treated patients with extensive stage small cell lung cancer: a Southwest Oncology Group (SWOG 0435) phase II trial	2005-07-01	2007-02-01	1	22	23	83	1020	4468
5258	A pharmacodynamic study of sorafenib in patients with relapsed and refractory acute leukemias	2005-07-25	2007-02-21	0	3	3	15	1023	4483
647	A phase I open-label study evaluating the cardiovascular safety of sorafenib in patients with advanced cancer	2005-08-01	2007-02-01	0	6	6	53	1029	4536
758	A phase II trial of sorafenib in first-line metastatic urothelial cancer: a study of the PMH Phase II Consortium	2005-08-01	2006-11-01	0	4	4	17	1033	4553
817	A phase II trial of sorafenib in metastatic melanoma with tissue correlates	2005-08-01	2007-09-01	0	2	2	35	1035	4588
710	Pharmacokinetic results of a phase I trial of sorafenib in combination with dacarbazine in patients with advanced solid tumors	2005-09-01	2006-08-01	0	5	5	23	1040	4611
727	Phase I targeted combination trial of sorafenib and erlotinib in patients with advanced solid tumors	2005-09-01	2011-05-01	0	16	16	17	1056	4628
803	Efficacy and safety of sorafenib in patients in the Asia-Pacific region with advanced hepatocellular carcinoma: a phase III randomised, double-blind, placebo-controlled trial	2005-09-01	2007-01-01	0	16	16	149	1072	4777
701	Phase 2 trial of sorafenib in patients with advanced urothelial cancer: a trial of the Eastern Cooperative Oncology Group	2005-10-01	2006-10-01	0	5	5	27	1077	4804
780	Phase II study of sorafenib in patients with metastatic or recurrent sarcomas	2005-10-01	2007-11-01	2	18	20	145	1097	4949
5541	SWOG 0514: A phase II study of sorafenib in patients with unresectable or metastatic gallbladder carcinoma and cholangiocarcinoma	2005-10-01	2007-01-01	1	4	5	31	1102	4980
6435	A phase II study of sorafenib (BAY 43-9006) in recurrent diffuse large B cell lymphoma: An eastern cooperative oncology group study (E1404)	2005-10-01	2006-12-01	0	5	5	14	1107	4994
730	Phase I trial of a combination of the multikinase inhibitor sorafenib and the farnesyltransferase inhibitor tipifarnib in advanced malignancies	2005-11-01	2007-12-01	0	10	10	50	1117	5044
5381	A phase II trial of intrapatient dose-escalated sorafenib in patients with metastatic renal cell carcinoma	2005-12-01	2006-11-01	0	30	30	44	1147	5088
6542	Phase 1 study of sorafenib in combination with bortezomib in patients with advanced malignancies	2005-12-01	2008-09-01	0	2	2	14	1149	5102
6227	Could interferon still play a role in metastatic renal cell carcinoma? A randomized study of two schedules of sorafenib plus interferon-alpha 2a (RAPSODY)	2006-01-01	2007-03-01	0	24	24	101	1173	5203
775	Phase II trial of sorafenib in advanced thyroid cancer	2006-02-01	2007-09-01	1	4	5	30	1178	5233
790	Phase III study of carboplatin and paclitaxel alone or with sorafenib in advanced non-small-cell lung cancer	2006-02-01	2007-05-01	14	39	53	463	1231	5696
707	Phase 2 Southwest Oncology Group-directed intergroup trial (S0505) of sorafenib in advanced soft tissue sarcomas	2006-03-01	2007-02-01	0	6	6	37	1237	5733
5426	Phase II Trial of Sorafenib in Combination with Carboplatin and Paclitaxel in Patients with Metastatic Uveal Melanoma: SWOG S0512	2006-03-01	2009-01-01	0	10	10	24	1247	5757
5726	Phase I/II study of sorafenib in combination with temsirolimus for recurrent glioblastoma or gliosarcoma: North American Brain Tumor Consortium study 05-02	2006-04-01	2010-02-01	0	8	8	31	1255	5788
6600	Phase II trial of sequential subcutaneous interleukin-2 plus interferon alpha followed by sorafenib in renal cell carcinoma (RCC)	2006-06-01	2007-07-01	0	4	4	41	1259	5829
694	Sorafenib in patients with advanced biliary tract carcinoma: a phase II trial	2006-08-01	2007-12-01	0	7	7	46	1266	5875
747	Phase I study of sorafenib in patients with refractory or relapsed acute leukemias	2006-08-01	2009-12-01	0	19	19	50	1285	5925
6103	A phase I trial and pharmacokinetic study of sorafenib in children with refractory solid tumors or leukemias: A Children's Oncology Group Phase I Consortium report	2006-08-01	2010-02-01	0	4	4	64	1289	5989
6191	Phase i pharmacokinetic and pharmacodynamic study of cetuximab, irinotecan and sorafenib in advanced colorectal cancer	2006-08-01	2010-09-01	0	3	3	18	1292	6007
7131	Phase II study evaluating the efficacy, safety, and pharmacodynamic correlative study of dual antiangiogenic inhibition using bevacizumab in combination with sorafenib in patients with advanced malignant melanoma	2006-08-01	2009-02-01	0	2	2	14	1294	6021
6767	Sorafenib in combination with intensive chemotherapy in elderly patients with acute myeloid leukemia: results from a randomized, placebo-controlled trial	2006-09-01	2008-06-01	0	58	58	102	1352	6123
7055	A Phase I, open-label study of Trebananib combined with sorafenib or sunitinib in patients with advanced renal cell carcinoma	2006-09-01	2010-04-01	0	1	1	17	1353	6140
699	Sorafenib with interleukin-2 vs sorafenib alone in metastatic renal cell carcinoma: the ROSORC trial	2006-10-01	2008-02-01	0	8	8	66	1361	6206
713	Phase II trial of sorafenib in combination with 5-fluorouracil infusion in advanced hepatocellular carcinoma	2006-10-01	2008-11-01	1	9	10	39	1371	6245
5769	Phase I study of sorafenib in combination with docetaxel and prednisone in chemo-naive patients with metastatic castration-resistant prostate cancer	2006-10-01	2009-05-01	1	18	19	37	1390	6282
7094	Prospective randomized double-blind multicentre phase II study comparing gemcitabine and cisplatin plus sorafenib chemotherapy with gemcitabine and cisplatin plus placebo in locally advanced and/or metastasized urothelial cancer: SUSE (AUO-AB 31/05)	2006-10-01	2010-10-01	0	5	5	40	1395	6322
708	Phase 2 open-label study of single-agent sorafenib in treating advanced hepatocellular carcinoma in a hepatitis B-endemic Asian population: presence of lung metastasis predicts poor response	2006-11-01	2008-01-01	0	10	10	51	1405	6373
779	Phase II clinical trial of sorafenib in metastatic medullary thyroid cancer	2006-11-01	2008-01-01	1	3	4	21	1409	6394
6221	Comprehensive biomarker analysis and final efficacy results of sorafenib in the BATTLE trial	2006-11-01	2009-10-01	0	17	17	105	1426	6499
6743	Phase ii prospective study with sorafenib in advanced soft tissue sarcomas after anthracycline-based therapy	2006-11-01	2010-01-01	0	7	7	100	1433	6599
6969	Phase 1 pharmacogenetic and pharmacodynamic study of sorafenib with concurrent radiation therapy and gemcitabine in locally advanced unresectable pancreatic cancer	2006-11-01	2009-11-01	1	12	13	27	1446	6626
716	Phase IB study of sorafenib in combination with gemcitabine and cisplatin in patients with refractory solid tumors	2006-11-07	2007-09-26	1	14	15	19	1461	6645
6883	Sorafenib in patients with refractory or recurrent multiple myeloma	2006-11-08	2008-08-01	0	1	1	11	1462	6656
802	Activity of a multitargeted chemo-switch regimen (sorafenib, gemcitabine, and metronomic capecitabine) in metastatic renal-cell carcinoma: a phase 2 study (SOGUG-02-06)	2006-12-01	2008-04-01	1	11	12	40	1474	6696
5600	BAYPAN study: A double-blind phase III randomized trial comparing gemcitabine plus sorafenib and gemcitabine plus placebo in patients with advanced pancreatic cancer	2006-12-01	2009-09-01	1	26	27	52	1501	6748
5950	Safety and pharmacokinetics of ganitumab (AMG 479) combined with sorafenib, panitumumab, erlotinib, or gemcitabine in patients with advanced solid tumors	2006-12-01	2009-09-01	0	3	3	13	1504	6761
7148	A phase i study of high-dose interleukin-2 with sorafenib in patients with metastatic renal cell carcinoma and melanoma	2006-12-01	2013-12-01	0	10	10	17	1514	6778
763	Safety and efficacy of sorafenib in patients with advanced hepatocellular carcinoma in consideration of concomitant stage of liver cirrhosis	2007-01-01	2008-03-01	0	8	8	34	1522	6812
5183	The combination of sorafenib with transarterial chemoembolisation for hepatocellular carcinoma	2007-01-01	2010-12-01	0	12	12	47	1534	6859
5383	Phase i trial of everolimus plus sorafenib for Patients with advanced renal cell cancer	2007-01-01	2008-03-01	0	2	2	15	1536	6874
5820	Phase i study investigating the safety and feasibility of combining imatinib mesylate (Gleevec) with sorafenib in patients with refractory castration-resistant prostate cancer	2007-01-01	2012-02-01	0	3	3	17	1539	6891
6448	Sorafenib and everolimus in advanced clear cell renal carcinoma: A phase I/II trial of the SCRI oncology research consortium	2007-01-01	2011-05-01	1	13	14	78	1553	6969
6682	NABTT 0502: A phase II and pharmacokinetic study of erlotinib and sorafenib for patients with progressive or recurrent glioblastoma multiforme	2007-01-01	2007-10-01	0	5	5	56	1558	7025
793	Phase II study of sorafenib in combination with docetaxel and cisplatin in the treatment of metastatic or advanced gastric and gastroesophageal junction adenocarcinoma: ECOG 5203	2007-02-01	2012-03-01	2	28	30	44	1588	7069
819	Response to sorafenib at a low dose in patients with radioiodine-refractory pulmonary metastases from papillary thyroid carcinoma	2007-02-01	2008-05-01	0	0	0	9	1588	7078
5865	Phase III, randomized, double-blind, placebo-controlled trial of gemcitabine/cisplatin alone or with sorafenib for the first-line treatment of advanced, nonsquamous non-small-cell lung cancer	2007-02-01	2009-03-01	5	38	43	385	1631	7463
739	Analysis of the efficacy and toxicity of sorafenib in thyroid cancer: a phase II study in a UK based population	2007-02-23	ongoing according to EU registry	0	15	15	34	1646	7497
796	Phase II study of combining sorafenib with metronomic tegafur/uracil for advanced hepatocellular carcinoma	2007-04-01	2008-04-01	0	8	8	53	1654	7550
5413	A phase II study of sorafenib in combination with bicalutamide in patients with chemotherapy-naive castration resistant prostate cancer	2007-04-01	2008-11-01	1	13	14	39	1668	7589
6693	Sorafenib in patients with child-pugh class A and B advanced hepatocellular carcinoma: A prospective feasibility analysis	2007-04-01	2008-07-01	0	44	44	297	1712	7886
811	Continuous administration of sorafenib in combination with transarterial chemoembolization in patients with hepatocellular carcinoma: results of a phase I study	2007-05-01	2009-01-01	0	3	3	15	1715	7901
5940	AMG 386 in combination with sorafenib in patients with metastatic clear cell carcinoma of the kidney: A randomized, double-blind, placebo-controlled, phase 2 study	2007-05-01	2008-11-01	1	19	20	101	1735	8002
697	A phase I/II trial of sorafenib and infliximab in advanced renal cell carcinoma	2007-06-01	2009-02-01	0	5	5	16	1740	8018
6433	A double-blind, randomised, placebo-controlled, phase 2b study evaluating sorafenib in combination with paclitaxel as a first-line therapy in patients with HER2-negative advanced breast cancer	2007-06-01	2009-01-01	2	36	38	115	1778	8133
6759	Sorafenib or placebo with either gemcitabine or capecitabine in patients with HER-2-negative advanced breast cancer that progressed during or after bevacizumab	2007-06-01	2010-08-01	1	39	40	79	1818	8212
695	A phase I dose-escalation study to evaluate safety and tolerability of sorafenib combined with sirolimus in patients with advanced solid cancer	2007-07-01	2009-05-01	0	5	5	19	1823	8231
714	Sorafenib in combination with carboplatin and paclitaxel as neoadjuvant chemotherapy in patients with advanced ovarian cancer	2007-07-01	2007-11-01	0	3	3	4	1826	8235
715	Sorafenib plus octreotide is an effective and safe treatment in advanced hepatocellular carcinoma: multicenter phase II So.LAR. study	2007-07-01	2008-07-01	0	6	6	50	1832	8285
6588	A phase I/II study of sorafenib in combination with low dose cytarabine in elderly patients with acute myeloid leukemia or high-risk myelodysplastic syndrome from the National Cancer Institute of Canada Clinical Trials Group: Trial IND.186	2007-07-01	2010-03-01	0	20	20	21	1852	8306
767	Sorafenib in Combination With Capecitabine: An Oral Regimen for Patients With HER2-Negative Locally Advanced or Metastatic Breast Cancer	2007-08-01	2008-12-01	0	44	44	112	1896	8418
6959	Sorafenib does not improve efficacy of chemotherapy in advanced pancreatic cancer: A GISCAD randomized phase II study	2007-08-01	2009-08-01	0	12	12	58	1908	8476
683	Sorafenib in combination with erlotinib or with gemcitabine in elderly patients with advanced non-small-cell lung cancer: a randomized phase II study	2007-09-01	2009-05-01	2	9	11	60	1919	8536
805	A phase I trial of sorafenib combined with cisplatin/etoposide or carboplatin/pemetrexed in refractory solid tumor patients	2007-09-01	2008-09-01	1	13	14	20	1933	8556
741	Beneficial effects of sorafenib on tumor progression, but not on radioiodine uptake, in patients with differentiated thyroid carcinoma	2007-10-01	2008-10-01	0	7	7	31	1940	8587
746	Sorafenib in combination with weekly topotecan in recurrent ovarian cancer, a phase I/II study of the Hoosier Oncology Group	2007-10-01	2009-05-01	0	7	7	29	1947	8616
748	Role of cetuximab and sorafenib in treatment of metastatic colorectal cancer	2007-10-01	2009-06-01	0	0	0	18	1947	8634
754	Phase I dose-finding study of sorafenib in combination with capecitabine and cisplatin as a first-line treatment in patients with advanced gastric cancer	2007-10-01	2008-07-01	1	14	15	21	1962	8655
788	Phase I/II study of combination therapy with sorafenib, idarubicin, and cytarabine in younger patients with acute myeloid leukemia	2007-10-01	2009-02-01	0	5	5	61	1967	8716
798	Effect of CYP3A-inducing anti-epileptics on sorafenib exposure: results of a phase II study of sorafenib plus daily temozolomide in adults with recurrent glioblastoma	2007-10-01	2008-11-01	0	6	6	32	1973	8748
5415	A phase I multi-institutional study of systemic sorafenib in conjunction with regional melphalan for in-transit melanoma of the extremity	2007-10-01	2009-08-01	0	4	4	20	1977	8768
6621	A phase II study of combined VEGF inhibitor (bevacizumab+sorafenib) in patients with metastatic breast cancer: Hoosier Oncology Group Study BRE06-109	2007-10-01	2009-03-01	0	4	4	18	1981	8786
7137	Phase i trial of sorafenib in combination with ifosfamide in patients with advanced sarcoma: A Spanish group for research on sarcomas (GEIS) study	2007-10-01	2009-02-01	0	5	5	12	1986	8798
7119	Sorafenib in the treatment of early breast cancer: Results of the neoadjuvant phase II study - SOFIA*	2007-11-01	2010-12-01	0	35	35	36	2021	8834
731	A multicenter phase II study of erlotinib and sorafenib in chemotherapy-naive patients with advanced non-small cell lung cancer	2007-12-01	2008-10-01	1	21	22	50	2043	8884
6932	A phase I, dose-finding study of sorafenib in combination with gemcitabine and radiation therapy in patients with unresectable pancreatic adenocarcinoma: A Grupo Espanol Multidisciplinario en Cancer Digestivo (GEMCAD) study	2007-12-01	2009-09-01	0	1	1	12	2044	8896
5606	A phase II trial of sorafenib in relapsed and unresectable high-grade osteosarcoma after failure of standard multimodal therapy: An Italian sarcoma group study	2008-01-01	2009-12-01	0	3	3	35	2047	8931
682	Sorafenib and pegylated interferon-alpha2b in advanced metastatic melanoma: a multicenter phase II DeCOG trial	2008-02-01	2009-02-01	4	26	30	55	2077	8986
712	A drug interaction study evaluating the pharmacokinetics and toxicity of sorafenib in combination with capecitabine	2008-02-01	2009-04-01	0	16	16	32	2093	9018
791	Randomized, double-blind, placebo-controlled, phase II trial of sorafenib and erlotinib or erlotinib alone in previously treated advanced non-small-cell lung cancer	2008-02-01	2009-02-01	0	17	17	111	2110	9129
6580	A phase i study of sorafenib, oxaliplatin and 2 days of high dose capecitabine in advanced pancreatic and biliary tract cancer: A Wisconsin oncology network study	2008-02-01	2010-07-01	0	3	3	16	2113	9145
5616	Phase II study of sorafenib in patients with relapsed or refractory lymphoma	2008-03-01	2010-07-01	0	6	6	30	2119	9175
6326	A phase i study of the combination of sorafenib with temozolomide and radiation therapy for the treatment of primary and recurrent high-grade gliomas	2008-03-01	2009-07-01	0	4	4	18	2123	9193
7258	Efficacy and safety of sorafenib in combination with gemcitabine in patients with advanced hepatocellular carcinoma: A multicenter, open-label, single-arm phase II study	2008-03-01	2010-10-01	0	15	15	45	2138	9238
6316	A phase i study of sorafenib and vorinostat in patients with advanced solid tumors with expanded cohorts in renal cell carcinoma and non-small cell lung cancer	2008-04-01	2010-10-01	1	4	5	35	2143	9273
732	Randomized phase II trial of sorafenib with temsirolimus or tipifarnib in untreated metastatic melanoma (S0438)	2008-05-01	2009-11-01	2	13	15	102	2158	9375
7301	A phase i study of sorafenib in combination with S-1 plus cisplatin in patients with advanced gastric cancer	2008-05-01	2009-01-01	0	8	8	13	2166	9388
5926	Sorafenib for patients with advanced angiosarcoma: A phase ii trial from the french sarcoma group (GSF/GETO)	2008-06-01	2009-06-01	0	6	6	39	2172	9427
6975	Multicenter phase II study of sequential radioembolization-sorafenib therapy for inoperable hepatocellular carcinoma	2008-06-01	2009-05-01	1	5	6	28	2178	9455
719	Cryotherapy is Associated with Improved Clinical Outcomes of Sorafenib Therapy for Advanced Hepatocellular Carcinoma	2008-07-01	2010-07-01	0	13	13	104	2191	9559
6264	Sorafenib and bevacizumab combination targeted therapy in advanced neuroendocrine tumour: A phase II study of Spanish Neuroendocrine Tumour Group (GETNE0801)	2008-07-01	2009-04-01	0	7	7	44	2198	9603
6911	Sorafenib plus daily low-dose temozolomide for relapsed glioblastoma: A phase ii study	2008-07-01	2011-10-01	0	4	4	42	2202	9645
7244	Phase II trial of Sorafenib in conjunction with chemotherapy and as maintenance therapy in extensive-stage small cell lung cancer	2008-08-01	2011-11-01	3	11	14	17	2216	9662
6403	Phase II study of bevacizumab in combination with sorafenib in recurrent glioblastoma (N0776): A North Central Cancer Treatment Group Trial	2008-09-01	2010-10-01	0	13	13	54	2229	9716
7165	Efficacy and safety of sorafenib-gemcitabine combination therapy in advanced hepatocellular carcinoma: An open-label Phase II feasibility study	2008-09-01	2009-12-01	0	6	6	30	2235	9746
6022	Conventional transarterial chemoembolisation in combination with sorafenib for patients with hepatocellular carcinoma: A pilot study	2008-10-01	2010-06-01	4	3	7	15	2242	9761
6957	Phase II trial of sorafenib and erlotinib in advanced pancreatic cancer	2008-10-01	2011-02-01	1	5	6	36	2248	9797
5421	Phase II study of weekly paclitaxel and sorafenib as second/third-line therapy in patients with adrenocortical carcinoma	2008-11-01	2009-02-01	0	3	3	10	2251	9807
6672	Phase 2 study of sorafenib in malignant mesothelioma previously treated with platinum-containing chemotherapy	2008-11-01	2011-04-01	0	8	8	53	2259	9860
744	Sorafenib as a third line therapy in patients with epithelial ovarian cancer or primary peritoneal cancer: a phase II study	2008-12-01	2009-09-01	0	1	1	11	2260	9871
5999	Feasibility study of intra-patient sorafenib dose-escalation or re-escalation in patients with previously treated advanced solid tumors	2008-12-01	2009-10-01	1	11	12	50	2272	9921
6382	Phase i study investigating everolimus combined with sorafenib in patients with advanced hepatocellular carcinoma	2008-12-01	2011-06-01	0	7	7	30	2279	9951
7041	Phase I study of combination chemotherapy using sorafenib and transcatheter arterial infusion with cisplatin for advanced hepatocellular carcinoma	2008-12-01	2010-08-01	0	6	6	20	2285	9971
6605	Multicenter phase II study of oxaliplatin and sorafenib in advanced gastric adenocarcinoma after failure of cisplatin and fluoropyrimidine treatment. A gemcad study	2009-01-01	2011-08-01	0	7	7	40	2292	10011
6875	Phase ii study of sorafenib in combination with cisplatin and 5-fluorouracil to treat recurrent or metastatic nasopharyngeal carcinoma	2009-01-01	2011-05-01	1	11	12	54	2304	10065
7124	Phase I/II trial of vinorelbine and sorafenib in metastatic breast cancer	2009-02-01	2010-07-01	0	16	16	46	2320	10111
7230	Sorafenib and irinotecan (NEXIRI) as second- or later-line treatment for patients with metastatic colorectal cancer and KRAS-mutated tumours: A multicentre Phase I/II trial	2009-02-01	2009-12-01	0	25	25	64	2345	10175
785	Phase II trial of sorafenib combined with concurrent transarterial chemoembolization with drug-eluting beads for hepatocellular carcinoma	2009-03-01	2011-01-01	0	24	24	35	2369	10210
6806	Sorafenib in combination with oxaliplatin, leucovorin, and fluorouracil (modified FOLFOX6) as first-line treatment of metastatic colorectal cancer: The RESPECT trial	2009-03-01	2010-02-01	2	47	49	97	2418	10307
709	PR-104 plus sorafenib in patients with advanced hepatocellular carcinoma	2009-04-01	2009-12-01	0	5	5	14	2423	10321
7058	Phase i study of sorafenib combined with radiation therapy and temozolomide as first-line treatment of high-grade glioma	2009-04-01	2011-03-01	0	5	5	15	2428	10336
726	Phase I study of the combination of sorafenib and temsirolimus in patients with metastatic melanoma	2009-06-01	NULL	0	8	8	25	2436	10361
6286	Sorafenib in patients with progressive epithelioid hemangioendothelioma: A phase 2 study by the French Sarcoma Group (GSF/GETO)	2009-06-01	2011-02-01	0	3	3	15	2439	10376
797	Phase II study of concurrent transarterial chemoembolization and sorafenib in patients with unresectable hepatocellular carcinoma	2009-07-01	2011-05-01	0	21	21	50	2460	10426
6274	Phase i study of sorafenib in combination with everolimus (RAD001) in patients with advanced neuroendocrine tumors	2009-07-01	2013-03-01	1	4	5	21	2465	10447
6956	Phase i trial of neoadjuvant conformal radiotherapy plus sorafenib for patients with locally advanced soft tissue sarcoma of the extremity	2009-07-01	2011-11-01	0	4	4	8	2469	10455
5733	Phase 1 trial of S-1 in combination with sorafenib for patients with advanced hepatocellular carcinoma	2009-08-01	2010-07-01	0	5	5	20	2474	10475
6561	A phase II study of gemcitabine and cisplatin plus sorafenib in patients with advanced biliary adenocarcinomas	2009-08-01	2010-12-01	0	20	20	37	2494	10512
777	Phase I pharmacokinetic and pharmacodynamic study of the multikinase inhibitor sorafenib in combination with clofarabine and cytarabine in pediatric relapsed/refractory leukemia	2009-09-01	2010-10-01	0	8	8	12	2502	10524
6617	Phase i trial of preoperative chemoradiation plus sorafenib for high-risk extremity soft tissue sarcomas with dynamic contrast-enhanced MRI correlates	2009-09-01	2011-07-01	0	15	15	16	2517	10540
7183	A phase I/II study of S-1 with sorafenib in patients with advanced hepatocellular carcinoma	2009-10-07	2013-09-01	0	10	10	45	2527	10585
6782	Phase i pharmacokinetic and pharmacodynamic study of lapatinib in combination with sorafenib in patients with advanced refractory solid tumors	2009-11-01	2010-10-01	0	2	2	30	2529	10615
6950	Sorafenib in radioactive iodine-refractory, locally advanced or metastatic differentiated thyroid cancer: a randomised, double-blind, phase 3 trial	2009-11-01	2011-08-01	1	42	43	207	2572	10822
5859	Sorafenib in patients with metastatic gastrointestinal stromal tumors who failed two or more prior tyrosine kinase inhibitors: A phase II study of Korean gastrointestinal stromal tumors study group	2009-12-01	2010-06-01	0	5	5	31	2577	10853
6516	Temsirolimus combined with sorafenib in hepatocellular carcinoma: A phase I dose-finding trial with pharmacokinetic and biomarker correlates	2009-12-01	2012-04-01	1	11	12	25	2589	10878
5763	Sorafenib treatment of FLT3-ITD(+) acute myeloid leukemia: favorable initial outcome and mechanisms of subsequent nonresponsiveness associated with the emergence of a D835 mutation	2009-12-30	2011-09-22	0	0	0	13	2589	10891
7001	S0941: A phase 2 SWOG study of sorafenib and erlotinib in patients with advanced gallbladder carcinoma or cholangiocarcinoma	2010-04-01	2011-03-01	1	5	6	34	2595	10925
6341	A phase II study of sorafenib in patients with platinum-pretreated, advanced (Stage IIIb or IV) non-small cell lung cancer with a KRAS mutation	2010-05-01	2011-02-01	0	4	4	57	2599	10982
6966	Phase 2 study of combined sorafenib and radiation therapy in patients with advanced hepatocellular carcinoma	2010-08-01	2013-09-01	0	9	9	40	2608	11022
7025	Phase i clinical trial of lenalidomide in combination with sorafenib in patients with advanced cancer	2010-08-01	2012-09-01	1	7	8	41	2616	11063
6711	Phase 2 study of azacytidine plus sorafenib in patients with acute myeloid leukemia and FLT-3 internal tandem duplication mutation	2011-01-01	2012-09-01	0	3	3	43	2619	11106
NO DATE OF ENROLMENT, EXCLUDED
157	Two drug interaction studies of sirolimus in combination with sorafenib or sunitinib in patients with advanced malignancies	NULL	NULL	0	9	9	34
685	Results of a Phase I trial of sorafenib (BAY 43-9006) in combination with doxorubicin in patients with refractory solid tumors	NULL	NULL	0	19	19	34
705	A phase 1 study of everolimus and sorafenib for metastatic clear cell renal cell carcinoma	NULL	NULL	0	7	7	20
735	Results of a phase I trial of sorafenib (BAY 43-9006) in combination with oxaliplatin in patients with refractory solid tumors, including colorectal cancer	NULL	NULL	0	2	2	37
736	Phase I trial to investigate the safety, pharmacokinetics and efficacy of sorafenib combined with docetaxel in patients with advanced refractory solid tumours	NULL	NULL	0	24	24	27
756	Phase I clinical and pharmacokinetic study of sorafenib in combination with carboplatin and paclitaxel in patients with advanced non-small cell lung cancer	NULL	NULL	0	9	9	13
5830	Phase i trial of sorafenib in combination with interferon-alpha in Japanese patients with unresectable or metastatic renal cell carcinoma	NULL	NULL	1	14	15	18
6003	Phase i trial of sorafenib in combination with 5-fluorouracil/leucovorin in advanced solid tumors	NULL	2007-01-01	0	7	7	47
6650	Phase I and clinical pharmacology study of bevacizumab, sorafenib, and low-dose cyclophosphamide in children and young adults with refractory/recurrent solid tumors	NULL	NULL	1	14	15	19
							11355
